# Supplementary material for: Tailored Supramolecular Soft Robotics by Intermolecular Interactions Defined Aspect-Ratio of Nanoassemblies for Photocontrolled Cell-Material Interfaces
Source: Research Square preprint supplement (doi:10.21203/rs.3.rs-7996724/v1), 2025-11-06
Supplement: Supplementary file 1 [file 436b220593464aef85c518a7.pdf]

# Supplementary Information

## Tailored Supramolecular Soft Robotics by Intermolecular Interactions Defined Aspect-Ratio of Nanoassemblies for Photocontrolled Cell-Material Interfaces

Ka-Lung Hung,<sup>1,2,5</sup> Wai-Ki Wong,<sup>1,2,3,5</sup> Leong-Hung Cheung,<sup>1,2,5</sup> Ming-Hin Chau,<sup>1,2</sup> Takashi Kajitani,<sup>4</sup> and Franco King-Chi Leung<sup>\*1,2,3</sup>

<sup>1</sup> The Hong Kong Polytechnic University Shenzhen Research Institute, Shenzhen, 518057, People's Republic of China.

<sup>2</sup> Department of Applied Biology and Chemical Technology, Research Institute of Future Food, The Hong Kong Polytechnic University, Hong Kong, China.

<sup>3</sup> Centre for Eye and Vision Research, 17W Hong Kong Science Park, Hong Kong, China.

<sup>4</sup> Core Facility Center, Research Infrastructure Management Center, Institute of Science Tokyo 4259 Nagatsuta, Midori-ku, Yokohama 226-8501, Japan.

<sup>5</sup> These authors contributed equally to this work.

\*Corresponding Author: [kingchifranco.leung@polyu.edu.hk](mailto:kingchifranco.leung@polyu.edu.hk) (F.K.-C. Leung)

## Table of Contents

|                                                                                                         |    |
|---------------------------------------------------------------------------------------------------------|----|
| <b>1. Materials and Method.</b> .....                                                                   | 3  |
| <b>General</b> .....                                                                                    | 3  |
| <b>Fourier-Transform Infrared Spectroscopy (FTIR)</b> .....                                             | 3  |
| <b>Circular Dichroism (CD)</b> .....                                                                    | 3  |
| <b>Transmission Electron Microscopy (TEM)</b> .....                                                     | 3  |
| <b>Pyrene Fluorescence Assay</b> .....                                                                  | 3  |
| <b>Polarized Optical Microscopy Analysis and Scanning Electron Microscopy (SEM)</b> .....               | 4  |
| <b>Preparation of Fluorescence Microsphere Loaded Macroscopic Soft Scaffold of DA<sub>A</sub></b> ..... | 4  |
| <b>2. Description of Supplementary Movies.</b> .....                                                    | 5  |
| <b>3. Synthesis</b> .....                                                                               | 7  |
| <b>4. Analytical Data</b> .....                                                                         | 61 |
| <b>5. References</b> .....                                                                              | 79 |

## 1. Materials and Method.

All commercial reagents are purchased from Dieckmann, Macklin, Sigma Aldrich and Tokyo Chemical Industry Co. Ltd, and were used as received unless otherwise specified. All reactions were performed under nitrogen unless otherwise specified. Analytical thin layer chromatography (TLC) was performed with Macherey-Nagel Silica gel 60 UV254 aluminum plates and visualization was accomplished by UV light (254 / 365 nm) or staining with phosphomolybdic acid followed by heating. Flash column chromatography was performed using Macherey-Nagel Silica gel 60 (230–400 mesh). Deuterated solvents were purchased from Cambridge Isotope Laboratories Inc.

### General.

NMR spectra were recorded at 25 °C on Bruker Avance III Ultrashield 400 Plus NMR spectrometer ( $^1\text{H}$ : 400 MHz,  $^{13}\text{C}$ : 101 MHz) and Bruker Avance III Ultrashield 600 Plus NMR spectrometer ( $^1\text{H}$ : 600 MHz,  $^{13}\text{C}$ : 151 MHz). Chemical shifts ( $\delta$ ) are expressed relative to the resonances of the residual non-deuterated solvent for  $^1\text{H}$  [tetramethylsilane (TMS) in  $\text{CDCl}_3$ :  $^1\text{H}(\delta) = 7.26$  ppm or  $^1\text{H}(\delta) = 0$  ppm,  $\text{CD}_3\text{OD}$ :  $^1\text{H}(\delta) = 3.31$  ppm and  $^{13}\text{C}$  [ $\text{CDCl}_3$ :  $^{13}\text{C}(\delta) = 77.16$  ppm,  $\text{CD}_3\text{OD}$ :  $^{13}\text{C}(\delta) = 49.00$  ppm]<sup>1</sup>. Absolute values of the coupling constants are given in Hertz (Hz), regardless of their sign. Multiplicities are abbreviated as singlet (s), double doublet (dd), doublet (d), triplet (t), quartet (q), p = pentet and multiplet (m). High-resolution mass spectrometry (HR-MS) was performed on an Agilent 6540 Q-TOF Mass Spectrometer with ESI ionization.

### Fourier-Transform Infrared Spectroscopy (FTIR)

The FTIR measurement was performed on Thermo Scientific Nicolet iS50 Fourier Transform Infrared Spectrometer in a range of 650–4000  $\text{cm}^{-1}$ , where data were selected in a range of 1800–1500  $\text{cm}^{-1}$  for observing hydrogen bonding. The corresponding solvent blank was acquired before sample measurement. The THF and  $\text{D}_2\text{O}$  of **DA<sub>A</sub>** (8.0 wt.% and 8.0 wt.%, respectively) were directly dropped on a  $\text{CaF}_2$  window with a 0.2 mm spacer.

### Circular Dichroism (CD)

CD spectra were recorded on Jasco J-1500 Circular Dichroism Spectrophotometer. A quartz cuvette with an optical pathlength of 4.0 mm was used for the CD spectroscopy measurements.

### Transmission Electron Microscopy (TEM)

The TEM was performed on a ThermoFisher Talos L120C Transmission Electron Microscope with a LaB6 filament operating at 120 kV equipped with a Ceta 16M CCD camera. TEM samples were prepared by depositing sample solutions (5.0  $\mu\text{L}$ ) onto a carbon grid (Micro to Nano, EMR Carbon support film on copper, 400 square mesh) for 60 s and removed by blotting. Subsequently, the UranyLess EM stain solution (Electron Microscopy Science, 5.0  $\mu\text{L}$ ) was directly deposited onto the grid for 15 s and the stain was removed by blotting.

### Pyrene Fluorescence Assay<sup>2</sup>

The critical aggregation concentration (CAC) of **DA<sub>A</sub>** was analysed by incorporation of the hydrophobic fluorescence probe of pyrene, which the  $I_1/I_3$  ratio will be decreased when there are more aggregates formation. Pyrene was dissolved at 0.5 mM in ethanol and diluted into sample stock solutions, with a final concentration of 1.2  $\mu$ M. As a result, all samples contain 0.25% ethanol, which is expected to not interfere with the supramolecular assembly behavior. Using an Agilent G9800AA Cary Eclipse fluorescence spectrophotometer, the aqueous solutions of **DA<sub>A</sub>** (concentration:  $1.0 \times 10^{-4}$  to 1.0 mM) and Pyrene (1.2  $\mu$ M) were excited at 335 nm and the spectra were recorded over a wavelength range of 360–500 nm. The  $I_1/I_3$  ratio were calculated by fluorescence intensity of  $I_{373}/I_{393}$  wavelength of pyrene in MilliQ water from the emission wavelength of the sample. The  $I_1/I_3$  ratio were plotted against sample concentrations to determine CAC.

### **Polarized Optical Microscopy Analysis and Scanning Electron Microscopy (SEM)**

Polarized optical microscopy (POM) was performed on a Leica DM2700-P optical polarizing microscope. When an aqueous solution of **DA<sub>A</sub>** (5.0 wt.%) was manually drawn from a pipette into an aqueous solution of CaCl<sub>2</sub> (150 mM) on a glass substrate, a noodle-like soft scaffold with an arbitrary length was formed. The arbitrary length of the macroscopic soft scaffold of **DA<sub>A</sub>** was directly subjected to perform and observe under POM on a Leica DM2700-P optical polarizing microscope. The SEM was performed on a Tescan VEGA3 Scanning Electron Microscope. An aqueous solution of **DA<sub>A</sub>** (5.0 wt.%) was manually drawn into an aqueous solution of CaCl<sub>2</sub> (150 mM) on a stage with conductive carbon adhesive tape from a pipette, a string with arbitrary length was formed. After removal the solution of metal chloride, the string of **DA<sub>A</sub>** was washed with MilliQ water for three times and dried in air for 48 hours before measurement. The air-dried samples were subject to gold sputtering for 20 min prior to SEM measurement.

### **Preparation of Fluorescence Microsphere Loaded Macroscopic Soft Scaffold of DA<sub>A</sub>**

An annealed aqueous solution of 5.0 wt.% **DA<sub>LPhe</sub>** (68.6 mM) was mixed with FluoSpheres™ Polystyrene Microspheres (Invitrogen™, thermofisher: F8836) at 3:2 volume ratio to obtain a 3.0 wt.% **DA<sub>LPhe</sub>** aqueous mixture solution. The solution mixture was then manually drawn from a pipette into an aqueous solution of CaCl<sub>2</sub> (150 mM) in a quartz container, forming a noodle-like with arbitrary length of macroscopic soft scaffold **DA<sub>LPhe</sub>** composing microspheres. After that, the microsphere was observed using Leica DM 2700P microscope equipped with Leica I3 filter and excited with 470 nm light source (M470L4-C2, 1.0 A). The actuation motion was induced by a red-laser (0.2W, 650 nm).

### **Photoirradiation Induced Volume Changes**

The macroscopic soft scaffolds of **DA<sub>A</sub>** (3.0 wt.%) were fabricated in a small petri dish containing CaCl<sub>2</sub> solution (150 mM). The CaCl<sub>2</sub> solution was removed and washed with MilliQ water for 3 times, followed by removing excessive water around the macroscopic soft scaffolds of **DA<sub>A</sub>** and refilling *n*-dodecane solution into petri dish. The macroscopic soft scaffolds of **DA<sub>A</sub>** were irradiated with red-laser (0.2 W, 650 nm) for 60 min to reveal volume reduction and recorded by Leica DM2700-P optical polarizing microscope.

## 2. Description of Supplementary Movies.

Photoirradiation studies were performed with red-light laser (0.2W, 650 nm). The movies are recorded directly with an iPhone Camera or Lumenera INFINITY3-6URC 6.0 Megapixel USB 3 Microscopy Camera for actuation studies under Leica DM2700-P optical polarizing microscope.

### **Movie S1: Photoactuation of a macroscopic soft scaffold $\text{DA}_{\text{LPh}} (3.0 \text{ wt.}\%)$ in $\text{CaCl}_2$ Solution.**

A macroscopic soft scaffold composed of  $\text{DA}_{\text{LPh}} (3.0 \text{ wt.}\%)$  in an aqueous solution was fabricated by manually drawing from a pipette into an aqueous solution of  $\text{CaCl}_2$  (150 mM) in a quartz container, a noodle-like soft scaffold with an arbitrary length was formed. Upon red laser (0.2W, 650 nm) irradiation for 60 min at a distance of 5 cm, the macroscopic soft scaffold of  $\text{DA}_{\text{LPh}}$  was bent toward the red laser-light source.

### **Movie S2: Photoactuation of a macroscopic soft scaffold $\text{DA}_{\text{LVal}} (3.0 \text{ wt.}\%)$ in $\text{CaCl}_2$ Solution.**

A macroscopic soft scaffold composed of  $\text{DA}_{\text{LVal}} (3.0 \text{ wt.}\%)$  in an aqueous solution was fabricated by manually drawing from a pipette into an aqueous solution of  $\text{CaCl}_2$  (150 mM) in a quartz container, a noodle-like soft scaffold with an arbitrary length was formed. Upon red laser (0.2W, 650 nm) irradiation for 60 min at a distance of 5 cm, the macroscopic soft scaffold of  $\text{DA}_{\text{LVal}}$  was bent toward the red-laser light source.

### **Movie S3: Photoactuation of a macroscopic soft scaffold $\text{DA}_{\text{LAla}} (3.0 \text{ wt.}\%)$ in $\text{CaCl}_2$ Solution.**

A macroscopic soft scaffold composed of  $\text{DA}_{\text{LAla}} (3.0 \text{ wt.}\%)$  in an aqueous solution was fabricated by manually drawing from a pipette into an aqueous solution of  $\text{CaCl}_2$  (150 mM) in a quartz container, a noodle-like soft scaffold with an arbitrary length was formed. Upon red laser (0.2W, 650 nm) irradiation for 60 min at a distance of 5 cm, the macroscopic soft scaffold of  $\text{DA}_{\text{LAla}}$  was bent toward the red laser-light source.

### **Movie S4: Photoactuation of a macroscopic soft scaffold $\text{DA}_{\text{DPh}} (3.0 \text{ wt.}\%)$ in $\text{CaCl}_2$ Solution.**

A macroscopic soft scaffold composed of  $\text{DA}_{\text{DPh}} (3.0 \text{ wt.}\%)$  in an aqueous solution was fabricated by manually drawing from a pipette into an aqueous solution of  $\text{CaCl}_2$  (150 mM) in a quartz container, a noodle-like soft scaffold with an arbitrary length was formed. Upon red laser (0.2W, 650 nm) irradiation for 60 min at a distance of 5 cm, the macroscopic soft scaffold of  $\text{DA}_{\text{DPh}}$  was bent toward the red laser-light source.

**Movie S5: Photoactuation of FluoSpheres™ Polystyrene Microspheres encapsulated macroscopic soft scaffold  $\text{DA}_{\text{LPh}} (3.0 \text{ wt.}\%)$  in  $\text{CaCl}_2$  Solution.** A FluoSpheres™ Polystyrene Microspheres encapsulated macroscopic soft scaffold  $\text{DA}_{\text{LPh}} (3.0 \text{ wt.}\%)$  in an aqueous solution was fabricated by manually drawing from a pipette into an aqueous solution of  $\text{CaCl}_2$  (150 mM) in a quartz container, a noodle-like soft scaffold with an arbitrary length was formed. The photoactuation was observed under microscope with 470 nm excitation. Upon photoirradiation

with red laser (0.2W, 650 nm) for 70 s, the microspheres encapsulated macroscopic soft scaffold **DA<sub>L</sub>Phe** were bent toward the red laser light source, accompany by the movement of microspheres.

**Movie S6: Photoirradiation induced volume change of a macroscopic soft scaffold DA<sub>L</sub>Phe (3.0 wt.%) immersed in *n*-dodecane solution.** A macroscopic soft scaffold composed of **DA<sub>L</sub>Phe** (3.0 wt.%) in an aqueous solution was fabricated by manually drawing from a pipette into an aqueous solution of CaCl<sub>2</sub> (150 mM) in a quartz container, a noodle-like soft scaffold with an arbitrary length was formed. The excessive aqueous solution of CaCl<sub>2</sub> was removed and refilled with *n*-dodecane solution. Under optical microscope, the macroscopic soft scaffold **DA<sub>L</sub>Phe** was slightly shrunk upon red laser irradiation (0.2W, 650 nm) for 60 min.

**Movie S7: Photoirradiation induced volume change of a macroscopic soft scaffold DA<sub>L</sub>Val (3.0 wt.%) immersed in *n*-dodecane solution.** A macroscopic soft scaffold composed of **DA<sub>L</sub>Val** (3.0 wt.%) in an aqueous solution was fabricated by manually drawing from a pipette into an aqueous solution of CaCl<sub>2</sub> (150 mM) in a quartz container, a noodle-like soft scaffold with an arbitrary length was formed. The excessive aqueous solution of CaCl<sub>2</sub> was removed and refilled with *n*-dodecane solution. Under optical microscope, the macroscopic soft scaffold **DA<sub>L</sub>Val** was significantly shrunk upon red laser irradiation (0.2W, 650 nm) for 60 min.

**Movie S8: Photoirradiation induced volume change of a macroscopic soft scaffold DA<sub>L</sub>Ala (3.0 wt.%) immersed in *n*-dodecane solution.** A macroscopic soft scaffold composed of **DA<sub>L</sub>Ala** (3.0 wt.%) in an aqueous solution was fabricated by manually drawing from a pipette into an aqueous solution of CaCl<sub>2</sub> (150 mM) in a quartz container, a noodle-like soft scaffold with an arbitrary length was formed. The excessive aqueous solution of CaCl<sub>2</sub> was removed and refilled with *n*-dodecane solution. Under optical microscope, the macroscopic soft scaffold **DA<sub>L</sub>Ala** was significantly shrunk upon red laser irradiation (0.2W, 650 nm) for 60 min.

**Movie S9: Photoirradiation of a cell cultured macroscopic soft scaffold DA<sub>L</sub>Phe (3.0 wt.%) after 2 % FBS medium incubation for 1 day.** A macroscopic soft scaffold of **DA<sub>L</sub>Phe** (3.0 wt.%) in an aqueous solution was fabricated by manually drawn from a pipette into an aqueous solution of CaCl<sub>2</sub> (150 mM) in a bioinert culture dish, a noodle-like soft scaffold with an arbitrary length was formed. The macroscopic soft scaffold was cultured with hMSCs in 2% FBS medium over 1 day incubation. The actuation motion of cell cultured macroscopic soft scaffold **DA<sub>L</sub>Phe** was performed and irradiated with red-laser (0.2 W, 650 nm) for 30 min.

### 3. Synthesis

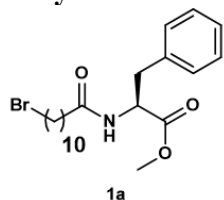

#### Compound 1a

A mixture of 11-Bromoundecanoic Acid (2.0 g, 7.54 mmol, 1.0 equiv.), HBTU (3.21 g, 8.29 mmol, 1.1 equiv.) and DIPEA (5.36 mL, 30.16 mmol, 4.0 equiv.) in DMF (20 mL) was stirred at 20 °C for 1 h. After that, the mixture was added with *L*-Phenylalanine Methyl Ester Hydrochloride (1.82 g, 7.54 mmol, 1.1 equiv.) and stirred at 20 °C for 1 h. The reaction mixture was diluted with ethyl acetate (20 mL), washed with brine (1 x 20 mL), water (2 x 20 mL) and Na<sub>2</sub>CO<sub>3</sub> (1 x 20 mL) and brine (1 x 20 mL), sequentially. The organic layer was dried over Na<sub>2</sub>SO<sub>4</sub> and the filtrate was concentrated under reduced pressure. The residue was purified by flash column chromatography on SiO<sub>2</sub> (*n*-hexane/ethyl acetate = 5/1, *R<sub>f</sub>* = 0.6) to afford **Compound 1a** (1.55 g, 3.63 mmol, 48% yield) as a white solid.

<sup>1</sup>H NMR (600 MHz, CDCl<sub>3</sub>) δ 7.31 – 7.22 (m, 3H), 7.11 – 7.07 (m, 2H), 5.88 (d, *J* = 7.8 Hz, 1H), 4.94 – 4.87 (m, 1H), 3.73 (s, 3H), 3.41 (t, *J* = 6.9 Hz, 2H), 3.18 – 3.07 (m, 2H), 2.17 (m, 2H), 1.85 (m, 2H), 1.58 (m, 2H), 1.42 (m, 2H), 1.31 – 1.27 (s, 10H).

<sup>13</sup>C NMR (151 MHz, CDCl<sub>3</sub>) δ 172.76, 172.32, 136.01, 129.38, 128.68, 127.24, 53.01, 52.44, 38.04, 36.66, 34.18, 32.94, 29.51, 29.48, 29.43, 29.38, 29.28, 28.97, 28.85, 28.27, 25.63.

HR-MS (ESI) calculated for C<sub>21</sub>H<sub>32</sub>BrNO<sub>3</sub> [M+H]<sup>+</sup> *m/z* 426.1644, found 426.1642.

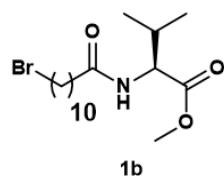

#### Compound 1b

A mixture of 11-Bromoundecanoic Acid (3.10 g, 11.7 mmol, 1.0 equiv.), HBTU (4.87 g, 12.8 mmol, 1.1 equiv.) and DIPEA (8.1 mL, 46.5 mmol, 4.0 equiv.) in DMF (20 mL) was stirred at 20 °C for 1 h. After that, the mixture was added with *L*-valine Methyl Ester Hydrochloride (2.15 g, 12.8 mmol, 1.1 equiv.) and stirred at 20 °C for 1 h. The reaction mixture was diluted with ethyl acetate (20 mL), washed with brine (1 x 20 mL), water (2 x 20 mL) and Na<sub>2</sub>CO<sub>3</sub> (1 x 20 mL) and brine (1 x 20 mL), sequentially. The organic layer was dried over Na<sub>2</sub>SO<sub>4</sub> and the filtrate was concentrated under reduced pressure. The residue was purified by flash column chromatography on SiO<sub>2</sub> (*n*-hexane/ethyl acetate = 5/1, *R<sub>f</sub>* = 0.6) to afford **Compound 1b** (2.26 g, 5.97 mmol, 51% yield) as a white solid.

$^1\text{H}$  NMR (600 MHz,  $\text{CDCl}_3$ )  $\delta$  6.02 (d,  $J = 9.5$  Hz, 1H), 4.54 (m, 1H), 3.69 (s, 3H), 3.37 – 3.34 (m, 2H), 2.22 – 2.17 (m, 2H), 1.83 – 1.78 (m, 2H), 1.63 – 1.58 (m, 2H), 1.39 – 1.36 (m, 2H), 1.29 – 1.24 (m, 10H), 0.90 – 0.85 (m, 6H).

$^{13}\text{C}$  NMR (151 MHz,  $\text{CDCl}_3$ )  $\delta$  173.10, 172.81, 56.85, 52.15, 36.69, 34.08, 32.84, 31.32, 29.38, 29.36, 29.30, 29.24, 28.75, 28.17, 25.71, 18.99, 17.88.

HR-MS (ESI) calculated for  $\text{C}_{17}\text{H}_{32}\text{BrNO}_3$   $[\text{M}+\text{H}]^+$   $m/z$  378.1644, found 378.1642.

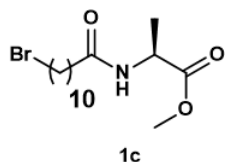

### Compound 1c

A mixture of 11-Bromoundecanoic Acid (4.98 g, 18.78 mmol, 1.0 equiv.), HBTU (7.83 g, 20.66 mmol, 1.1 equiv.) and DIPEA (13.1 mL, 75.12 mmol, 4.0 equiv.) in DMF (40 mL) was stirred at 20 °C for 1 h. After that, the mixture was added with *L*-alanine Methyl Ester Hydrochloride (2.88 g, 20.66 mmol, 1.1 equiv.) and stirred at 20 °C for 1 h. The reaction mixture was diluted with ethyl acetate (20 mL), washed with brine (1 x 20 mL), water (2 x 20 mL) and  $\text{Na}_2\text{CO}_3$  (1 x 20 mL) and brine (1 x 20 mL), sequentially. The organic layer was dried over  $\text{Na}_2\text{SO}_4$  and the filtrate was concentrated under reduced pressure. The residue was purified by flash column chromatography on  $\text{SiO}_2$  (*n*-hexane/ethyl acetate = 5/1,  $R_f$  = 0.6) to afford **Compound 1c** (4.28 g, 12.22 mmol, 65% yield) as a white solid.

$^1\text{H}$  NMR (600 MHz,  $\text{CDCl}_3$ )  $\delta$  6.00 (d,  $J = 7.4$  Hz, 1H), 4.63 – 4.58 (m, 1H), 3.75 (s, 3H), 3.40 (t,  $J = 6.9$  Hz, 2H), 2.20 (t,  $J = 7.6$  Hz, 2H), 1.86 – 1.82 (m, 2H), 1.65 – 1.62 (m, 2H), 1.43 – 1.40 (m, 5H), 1.32 – 1.27 (m, 10H).

$^{13}\text{C}$  NMR (151 MHz,  $\text{CDCl}_3$ )  $\delta$  173.90, 172.75, 52.62, 47.99, 36.70, 34.24, 32.95, 29.49, 29.46, 29.40, 29.31, 28.86, 28.28, 25.67, 18.77.

HR-MS (ESI) calculated for  $\text{C}_{15}\text{H}_{28}\text{BrNO}_3$   $[\text{M}+\text{H}]^+$   $m/z$  350.1331, found 350.1330.

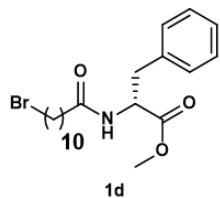

### Compound 1d

A mixture of 11-Bromoundecanoic Acid (2.02 g, 7.62 mmol, 1.0 equiv.), HBTU (3.18 g, 8.39 mmol, 1.1 equiv.) and DIPEA (5.3 mL, 33.5 mmol, 4.0 equiv.) in DMF (20 mL) was stirred at 20 °C for 1 h. After that, the mixture was added with *D*-Phenylalanine Methyl Ester Hydrochloride (1.81 g, 8.39 mmol, 1.1 equiv.) and stirred at 20 °C for 1 h. The reaction mixture was diluted with



ethyl acetate (20 mL), washed with brine (1 x 20 mL), water (2 x 20 mL) and Na<sub>2</sub>CO<sub>3</sub> (1 x 20 mL) and brine (1 x 20 mL), sequentially. The organic layer was dried over Na<sub>2</sub>SO<sub>4</sub> and the filtrate was concentrated under reduced pressure. The residue was purified by flash column chromatography on SiO<sub>2</sub> (*n*-hexane/ethyl acetate = 5/1, *R<sub>f</sub>* = 0.6) to afford **Compound 1d** (2.33 g, 5.46 mmol, 72% yield) as a white solid.

<sup>1</sup>H NMR (600 MHz, CDCl<sub>3</sub>) δ 7.30 – 7.23 (m, 3H), 7.10 – 7.08 (m, 2H), 5.87 (d, *J* = 7.8 Hz, 1H), 4.92 – 4.89 (m, 1H), 3.73 (s, 3H), 3.41 (t, *J* = 6.9 Hz, 2H), 3.17 – 3.08 (m, 2H), 2.18 – 2.15 (m, 2H), 1.87 – 1.83 (m, 2H), 1.61 – 1.56 (m, 2H), 1.44 – 1.39 (m, 2H), 1.31 – 1.26 (m, 10H).

<sup>13</sup>C NMR (151 MHz, CDCl<sub>3</sub>) δ 172.75, 172.31, 136.00, 129.38, 128.68, 127.25, 53.00, 52.46, 38.03, 36.67, 34.21, 32.94, 29.49, 29.44, 29.39, 29.28, 28.85, 28.28, 25.64.

HR-MS (ESI) calculated for C<sub>21</sub>H<sub>32</sub>BrNO<sub>3</sub> [M+H]<sup>+</sup> *m/z* 426.1644, found 426.1643.

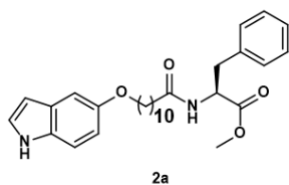

### Compound 2a

A mixture of Compound **1a** (1.43 g, 3.36 mmol, 1.0 equiv.), 5-hydroxyindole (0.49 g, 3.70 mmol, 1.1 equiv.) and potassium carbonate (1.16 g, 8.40 mmol, 2.5 equiv.) in DMF (10 mL) was heated at 85 °C for 16 h. After cooling to room temperature, the reaction mixture was diluted with ethyl acetate (20 mL), washed with brine (1 x 20 mL), water (2 x 20 mL) and brine (1 x 20 mL) sequentially. The organic layer was dried over Na<sub>2</sub>SO<sub>4</sub> and the filtrate was concentrated under reduced pressure. The residue was purified by flash column chromatography on SiO<sub>2</sub> (*n*-hexane/ethyl acetate = 3/1, *R<sub>f</sub>* = 0.30) to afford **Compound 2a** (0.783 g, 1.64 mmol, 49% yield) as a white solid.

<sup>1</sup>H NMR (600 MHz, CDCl<sub>3</sub>) δ 8.13 (s, 1H), 7.30 – 7.23 (m, 4H), 7.16 (t, *J* = 2.8 Hz, 1H), 7.10 – 7.08 (m, 3H), 6.85 (dd, *J* = 8.8, 2.4 Hz, 1H), 6.46 (t, *J* = 3.1 Hz, 1H), 5.85 (d, *J* = 7.8 Hz, 1H), 4.92 – 4.89 (m, 1H), 3.99 (t, *J* = 6.6 Hz, 2H), 3.72 (s, 3H), 3.17 – 3.07 (m, 2H), 2.19 – 2.11 (m, 2H), 1.82 – 1.77 (m, 2H), 1.60 – 1.55 (m, 2H), 1.49 – 1.44 (m, 2H), 1.37 – 1.32 (m, 2H), 1.31 – 1.26 (m, 10H).

<sup>13</sup>C NMR (151 MHz, CDCl<sub>3</sub>) δ 172.84, 172.34, 153.79, 136.02, 131.12, 129.39, 128.70, 128.46, 127.26, 124.89, 113.09, 111.72, 103.67, 102.46, 68.96, 53.04, 52.44, 38.06, 36.69, 29.65, 29.61, 29.51, 29.42, 29.32, 26.24, 25.68.

HR-MS (ESI) calculated for C<sub>29</sub>H<sub>38</sub>N<sub>2</sub>O<sub>4</sub> [M+H]<sup>+</sup> *m/z* 479.2910, found 479.2908.

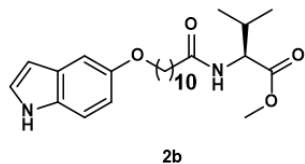

### Compound 2b

A mixture of Compound **1b** (1.89 g, 4.99 mmol, 1.0 equiv.), 5-hydroxyindole (0.73 g, 5.49 mmol, 1.1 equiv.) and potassium carbonate (1.72 g, 12.47 mmol, 2.5 equiv.) in DMF (10 mL) was heated at 85 °C for 20 h. After cooling to room temperature, the reaction mixture was diluted with ethyl acetate (20 mL), washed with brine (1 x 20 mL), water (2 x 20 mL) and brine (1 x 20 mL) sequentially. The organic layer was dried over Na<sub>2</sub>SO<sub>4</sub> and the filtrate was concentrated under reduced pressure. The residue was purified by flash column chromatography on SiO<sub>2</sub> (*n*-hexane/ethyl acetate = 2/1, *R<sub>f</sub>* = 0.30) to afford **Compound 2b** (1.05 g, 2.44 mmol, 49% yield) as a white solid.

<sup>1</sup>H NMR (600 MHz, CDCl<sub>3</sub>) δ 8.32 (s, 1H), 7.25 (d, *J* = 8.1 Hz, 1H), 7.15 (s, 1H), 7.10 (s, 1H), 6.85 (d, *J* = 8.8 Hz, 1H), 6.45 (s, 1H), 5.97 (d, *J* = 8.8 Hz, 1H), 4.59 (dd, *J* = 9.1, 4.9 Hz, 1H), 3.99 (t, *J* = 6.6 Hz, 2H), 3.73 (s, 3H), 2.22 (t, *J* = 7.6 Hz, 2H), 2.14 (p, *J* = 6.8 Hz, 1H), 1.79 (t, *J* = 7.1 Hz, 2H), 1.63 (t, *J* = 7.5 Hz, 2H), 1.46 (t, *J* = 7.6 Hz, 2H), 1.34 – 1.29 (m, 10H), 0.92 (dd, *J* = 22.23, 6.9 Hz, 6H).

<sup>13</sup>C NMR (151 MHz, CDCl<sub>3</sub>) δ 173.28, 172.87, 153.65, 131.10, 128.38, 124.94, 112.95, 111.75, 103.53, 102.26, 68.90, 56.94, 52.24, 36.82, 31.39, 29.60, 29.56, 29.50, 29.48, 29.39, 29.32, 26.20, 25.80, 19.05, 17.94.

HR-MS (ESI) calculated for C<sub>25</sub>H<sub>38</sub>N<sub>2</sub>O<sub>4</sub> [M+H]<sup>+</sup> *m/z* 431.2910, found 431.2908.

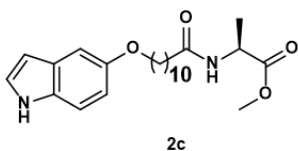

### Compound 2c

A mixture of Compound **1b** (1.82 g, 5.20 mmol, 1.0 equiv.), 5-hydroxyindole (0.76 g, 5.72 mmol, 1.1 equiv.) and potassium carbonate (1.16 g, 12.99 mmol, 2.5 equiv.) in DMF (10 mL) was heated at 85 °C for 16 h. After cooling to room temperature, the reaction mixture was diluted with ethyl acetate (20 mL), washed with brine (1 x 20 mL), water (2 x 20 mL) and brine (1 x 20 mL) sequentially. The organic layer was dried over Na<sub>2</sub>SO<sub>4</sub> and the filtrate was concentrated under reduced pressure. The residue was purified by flash column chromatography on SiO<sub>2</sub> (*n*-hexane/ethyl acetate = 3/1, *R<sub>f</sub>* = 0.30) to afford **Compound 2c** (1.29 g, 3.20 mmol, 62% yield) as a white solid.

<sup>1</sup>H NMR (600 MHz, CDCl<sub>3</sub>) δ 8.11 (s, 1H), 7.28 (d, *J* = 8.6 Hz, 1H), 7.18 (s, 1H), 7.10 (s, 1H), 6.86 (d, *J* = 8.8, 2.1 Hz, 1H), 6.47 (s, 1H), 5.99 (d, *J* = 7.4 Hz, 1H), 4.64 – 4.59 (m, 1H), 3.99 (t,

$J = 6.6$  Hz, 2H), 3.75 (s, 3H), 2.20 (t,  $J = 7.7$  Hz, 2H), 1.82 – 1.77 (m, 2H), 1.65 – 1.63 (m, 2H), 1.49 – 1.44 (m, 2H), 1.40 (d,  $J = 7.1$  Hz, 3H), 1.33 – 1.29 (m, 10H).

$^{13}\text{C}$  NMR (151 MHz,  $\text{CDCl}_3$ )  $\delta$  173.90, 172.81, 153.77, 131.06, 128.43, 124.89, 113.09, 111.73, 103.59, 102.48, 68.93, 52.62, 48.00, 36.72, 29.65, 29.60, 29.52, 29.44, 29.34, 26.24, 25.71, 18.76.

HR-MS (ESI) calculated for  $\text{C}_{23}\text{H}_{34}\text{N}_2\text{O}_4$   $[\text{M}+\text{H}]^+$   $m/z$  403.2597, found 403.2595.

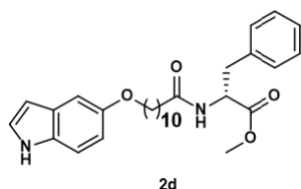

### Compound 2d

A mixture of Compound **1d** (1.19 g, 2.79 mmol, 1.0 equiv.), 5-hydroxyindole (0.41 g, 2.79 mmol, 1.1 equiv.) and potassium carbonate (1.16 g, 6.98 mmol, 2.5 equiv.) in DMF (10 mL) was heated at 85 °C for 16 h. After cooling to room temperature, the reaction mixture was diluted with ethyl acetate (20 mL), washed with brine (1 x 20 mL), water (2 x 20 mL) and brine (1 x 20 mL) sequentially. The organic layer was dried over  $\text{Na}_2\text{SO}_4$  and the filtrate was concentrated under reduced pressure. The residue was purified by flash column chromatography on  $\text{SiO}_2$  (*n*-hexane/ethyl acetate = 3/1,  $R_f$  = 0.30) to afford **Compound 2d** (0.64 g, 1.34 mmol, 48% yield) as a white solid.

$^1\text{H}$  NMR (600 MHz,  $\text{CDCl}_3$ )  $\delta$  8.15 (s, 1H), 7.32 – 7.22 (m, 4H), 7.17 (t,  $J = 2.8$  Hz, 1H), 7.12 – 7.06 (m, 3H), 6.86 (dd,  $J = 8.8, 2.4$  Hz, 1H), 6.46 (t,  $J = 2.5$  Hz, 1H), 5.87 (d,  $J = 7.8$  Hz, 1H), 4.92 – 4.89 (m, 1H), 3.99 (t,  $J = 6.6$  Hz, 2H), 3.73 (s, 3H), 3.15 (m, 1H), 3.09 (dd,  $J = 13.9, 5.8$  Hz, 1H), 2.18 – 2.12 (m, 2H), 1.82 – 1.77 (m, 2H), 1.59 – 1.55 (m, 2H), 1.49 – 1.44 (m, 2H), 1.37 – 1.25 (m, 10H)

$^{13}\text{C}$  NMR (151 MHz,  $\text{CDCl}_3$ )  $\delta$  172.87, 172.33, 153.73, 135.98, 131.06, 129.38, 128.70, 128.41, 127.26, 124.90, 113.05, 111.73, 103.55, 102.42, 68.90, 53.01, 52.47, 38.02, 36.68, 29.64, 29.59, 29.51, 29.42, 29.31, 26.23, 25.67.

HR-MS (ESI) calculated for  $\text{C}_{29}\text{H}_{38}\text{N}_2\text{O}_4$   $[\text{M}+\text{H}]^+$   $m/z$  479.2910, found 479.2910.

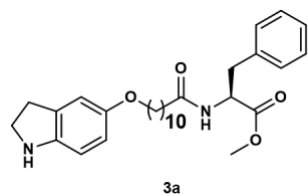

### Compound 3a

To a solution of Compound **2a** (0.7680 g, 1.60 mmol, 1.0 equiv.) in acetic acid (8 mL), sodium cyanoborohydride (0.3025 g, 4.81 mmol, 3.0 equiv.) was added in one portion. The reaction

mixture was stirred at 20 °C for 3 h. The reaction was cooled to 0 °C and quenched by adding H<sub>2</sub>O (5 mL). The pH of reaction mixture was adjusted to ~7 by adding 4 M NaOH solution. The reaction mixture was extracted with ethyl acetate (3 x 15 mL). The combined organic layer was washed with brine (1 x 15 mL). The organic layer was dried over Na<sub>2</sub>SO<sub>4</sub> and the filtrate was concentrated under reduced pressure. The residue was purified by flash column chromatography on SiO<sub>2</sub> (*n*-hexane/ethyl acetate = 2/1, *R<sub>f</sub>* = 0.15) to afford **Compound 3a** (0.61 g, 1.27 mmol, 79% yield) as white solid.

<sup>1</sup>H NMR (600 MHz, CDCl<sub>3</sub>) δ 7.31 – 7.25 (m, 5H), 7.10 (d, *J* = 7.2 Hz, 2H), 6.77 (s, 1H), 6.60 (s, 2H), 5.89 (d, *J* = 7.8 Hz, 1H), 4.92 (q, *J* = 6.8, 5.8 Hz, 1H), 3.89 (td, *J* = 6.6, 2.0 Hz, 2H), 3.75 (s, 3H), 3.54 (t, *J* = 8.2 Hz, 2H), 3.19 – 3.09 (m, 2H), 3.01 (t, *J* = 8.3 Hz, 2H), 2.18 (t, *J* = 7.7 Hz, 2H), 1.77 – 1.72 (m, 2H), 1.62 – 1.57 (m, 2H), 1.46 – 1.41 (m, 2H), 1.35 – 1.28 (m, 10H).

<sup>13</sup>C NMR (151 MHz, CDCl<sub>3</sub>) δ 172.80, 172.33, 153.18, 145.32, 136.01, 131.22, 129.40, 128.70, 127.26, 113.22, 112.50, 110.29, 69.07, 53.02, 52.47, 47.93, 38.05, 36.70, 30.61, 29.65, 29.59, 29.51, 29.43, 29.32, 26.19, 25.68.

HR-MS (ESI) calculated for C<sub>29</sub>H<sub>40</sub>N<sub>2</sub>O<sub>4</sub> [M+H]<sup>+</sup> *m/z* 481.3066, found 481.3065.

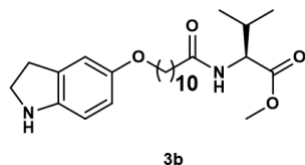

### Compound 3b

To a solution of Compound **2b** (0.99 g, 2.30 mmol, 1.0 equiv.) in acetic acid (7 mL), sodium cyanoborohydride (0.43 g, 6.90 mmol, 3.0 equiv.) was added in one portion. The reaction mixture was stirred at 20 °C for 3 h. The reaction was cooled to 0 °C and quenched by adding H<sub>2</sub>O (5 mL). The pH of reaction mixture was adjusted to ~7 by adding 4 M NaOH solution. The reaction mixture was extracted with ethyl acetate (3 x 15 mL). The combined organic layer was washed with brine (1 x 15 mL). The organic layer was dried over Na<sub>2</sub>SO<sub>4</sub> and the filtrate was concentrated under reduced pressure. The residue was purified by flash column chromatography on SiO<sub>2</sub> (*n*-hexane/ethyl acetate = 2/1, *R<sub>f</sub>* = 0.15) to afford **Compound 3b** (0.77 g, 1.78 mmol, 78% yield) as white solid.

<sup>1</sup>H NMR (600 MHz, CDCl<sub>3</sub>) δ 6.76 (s, 1H), 6.58 (s, 2H), 5.92 (d, *J* = 8.9 Hz, 1H), 4.60 – 4.58 (m, 1H), 3.87 (t, *J* = 6.7 Hz, 2H), 3.74 (s, 3H), 3.53 (t, *J* = 8.3 Hz, 2H), 3.00 (t, *J* = 8.3 Hz, 2H), 2.23 (t, *J* = 7.8 Hz, 2H), 2.18 – 2.13 (m, 1H), 1.75 – 1.70 (m, 2H), 1.66 – 1.61 (m, 2H), 1.45 – 1.40 (m, 2H), 1.34 – 1.29 (m, 10H), 0.94 (dd, *J* = 6.8, 1.9 Hz, 3H), 0.90 (dd, *J* = 6.9, 1.9 Hz, 3H).

<sup>13</sup>C NMR (151 MHz, CDCl<sub>3</sub>) δ 173.17, 172.90, 153.18, 145.33, 131.22, 113.23, 112.51, 110.29, 69.09, 56.92, 52.27, 47.93, 36.89, 31.47, 30.61, 29.64, 29.59, 29.53, 29.50, 29.44, 29.37, 26.19, 25.83, 19.08, 17.97.

HR-MS (ESI) calculated for C<sub>25</sub>H<sub>40</sub>N<sub>2</sub>O<sub>4</sub> [M+H]<sup>+</sup> *m/z* 433.3066, found 433.3065.

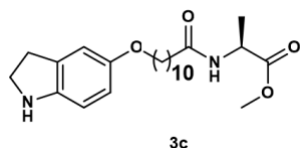

### Compound 3c

To a solution of Compound **2c** (1.28 g, 3.17 mmol, 1.0 equiv.) in acetic acid (8 mL), sodium cyanoborohydride (0.60 g, 9.52 mmol, 3.0 equiv.) was added in one portion. The reaction mixture was stirred at 20 °C for 3 h. The reaction was cooled to 0 °C and quenched by adding H<sub>2</sub>O (5 mL). The pH of reaction mixture was adjusted to ~7 by adding 4 M NaOH solution. The reaction mixture was extracted with ethyl acetate (3 x 15 mL). The combined organic layer was washed with brine (1 x 15 mL). The organic layer was dried over Na<sub>2</sub>SO<sub>4</sub> and the filtrate was concentrated under reduced pressure. The residue was purified by flash column chromatography on SiO<sub>2</sub> (*n*-hexane/ethyl acetate = 2/1, *R<sub>f</sub>* = 0.15) to afford **Compound 3c** (0.82 g, 2.02 mmol, 64 % yield) as white solid.

<sup>1</sup>H NMR (600 MHz, CDCl<sub>3</sub>) δ 6.76 (s, 1H), 6.58 (s, 2H), 6.00 (d, *J* = 7.3 Hz, 1H), 4.64 – 4.59 (m, 1H), 3.87 (t, *J* = 6.6 Hz, 2H), 3.75 (s, 3H), 3.53 (t, *J* = 8.3 Hz, 2H), 3.00 (t, *J* = 8.3 Hz, 2H), 2.20 (t, *J* = 7.6 Hz, 2H), 1.75 – 1.70 (m 2H), 1.65 – 1.61 (m, 3H), 1.45 – 1.40 (m, 5H), 1.34 – 1.28 (m, 10H).

<sup>13</sup>C NMR (151 MHz, CDCl<sub>3</sub>) δ 173.90, 172.77, 153.17, 145.36, 131.22, 113.22, 112.51, 110.27, 69.09, 52.61, 48.00, 47.94, 36.73, 30.62, 29.64, 29.60, 29.53, 29.51, 29.44, 29.34, 26.19, 25.71, 18.78.

HR-MS (ESI) calculated for C<sub>23</sub>H<sub>36</sub>N<sub>2</sub>O<sub>4</sub> [M+H]<sup>+</sup> *m/z* 405.2753, found 405.2752.

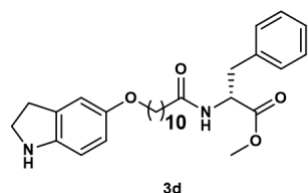

### Compound 3d

To a solution of Compound **2d** (0.63 g, 1.32 mmol, 1.0 equiv.) in acetic acid (7 mL), sodium cyanoborohydride (0.25 g, 3.96 mmol, 3.0 equiv.) was added in one portion. The reaction mixture was stirred at 20 °C for 3 h. The reaction was cooled to 0 °C and quenched by adding H<sub>2</sub>O (5 mL). The pH of reaction mixture was adjusted to ~7 by adding 4 M NaOH solution. The reaction mixture was extracted with ethyl acetate (3 x 15 mL). The combined organic layer was washed with brine (1 x 15 mL). The organic layer was dried over Na<sub>2</sub>SO<sub>4</sub> and the filtrate was concentrated under reduced pressure. The residue was purified by flash column chromatography on SiO<sub>2</sub> (*n*-hexane/ethyl acetate = 2/1, *R<sub>f</sub>* = 0.15) to afford **Compound 3d** (0.32 g, 0.66 mmol, 50% yield) as white solid.

<sup>1</sup>H NMR (600 MHz, CDCl<sub>3</sub>) δ 7.30 – 7.23 (m, 5H), 7.09 (d, *J* = 7.2, 2H), 6.76 (s, 1H), 6.58 (s, 1H), 5.90 (d, *J* = 7.9 Hz, 1H), 4.91 (q, *J* = 6.8 Hz, 1H), 3.87 (t, *J* = 6.6 Hz, 2H), 3.73 (s, 3H), 3.52

(t,  $J = 8.3$  Hz, 2H), 3.17 – 3.08 (m, 2H), 3.00 (t,  $J = 8.3$  Hz, 2H), 2.16 (t,  $J = 7.8$  Hz, 2H), 1.75 – 1.73 (p,  $J = 6.7$  Hz, 2H), 1.58 (p,  $J = 7.2$  Hz, 2H), 1.42 (p,  $J = 7.8$  Hz, 2H), 1.35 – 1.26 (m, 10H).

$^{13}\text{C}$  NMR (151 MHz,  $\text{CDCl}_3$ )  $\delta$  172.81, 172.33, 153.16, 145.34, 136.01, 131.22, 129.40, 128.70, 127.26, 113.21, 112.50, 110.28, 69.07, 53.01, 52.47, 47.94, 38.05, 36.70, 30.61, 29.65, 29.59, 29.51, 29.43, 29.32, 26.19, 25.68.

HR-MS (ESI) calculated for  $\text{C}_{29}\text{H}_{40}\text{N}_2\text{O}_4$   $[\text{M}+\text{H}]^+$   $m/z$  481.3066, found 481.3065.

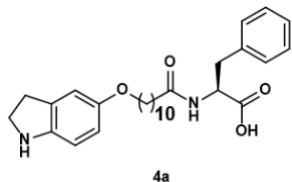

### Compound 4a

To a solution of Compound **3a** (186.5 mg, 0.39 mmol, 1.0 equiv.) in methanol (2 mL) and THF (2 mL), an aqueous solution of NaOH (4M, 1 mL) was added the reaction mixture and then heated at 80 °C for 1 h. After cooling to room temperature, volatile solvents were removed under reduced pressure. The pH of reaction mixture was adjusted to ~7 by adding 1 M HCl solution that off-white precipitate formed. The filtered precipitate was washed with  $\text{H}_2\text{O}$  (0.5 mL) to afford **Compound 4a** as an off-white solid (116.9 mg, 0.25 mmol, 65% yield).

$^1\text{H}$  NMR (600 MHz, DMSO)  $\delta$  8.01 (d,  $J = 8.2$  Hz, 1H), 7.25 – 7.16 (m, 5H), 6.68 (s, 1H), 6.48 (d,  $J = 8.4$  Hz, 1H), 6.40 (d,  $J = 8.3$  Hz, 1H), 4.37 (q,  $J = 8.2$  Hz, 1H), 3.80 (t,  $J = 6.6$  Hz, 2H), 3.04 (dd,  $J = 13.8, 4.7$  Hz, 1H), 2.86 – 2.78 (m, 3H), 2.01 (t,  $J = 7.3$  Hz, 2H), 1.63 (p,  $J = 6.9$  Hz, 2H), 1.39 – 1.16 (m, 12H), 1.10 – 1.08 (m, 2H).

$^{13}\text{C}$  NMR (151 MHz, DMSO)  $\delta$  173.24, 172.01, 151.36, 146.39, 138.01, 130.31, 129.13, 128.04, 126.24, 112.76, 112.02, 108.89, 68.09, 53.49, 46.94, 36.83, 35.16, 29.89, 29.02, 28.95, 28.91, 28.84, 28.82, 28.47, 25.61, 25.23.

HR-MS (ESI) calculated for  $\text{C}_{28}\text{H}_{38}\text{N}_2\text{O}_4$   $[\text{M}+\text{H}]^+$   $m/z$  467.2910, found 467.2909.

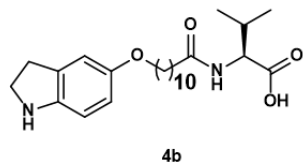

### Compound 4b

To a solution of Compound **3b** (150 mg, 0.35 mmol, 1.0 equiv.) in methanol (2 mL) and THF (2 mL), an aqueous solution of NaOH (4M, 1 mL) was added the reaction mixture and then heated at 80 °C for 1 h. After cooling to room temperature, volatile solvents were removed under reduced pressure. The pH of reaction mixture was adjusted to ~7 by adding 1 M HCl solution that off-white

precipitate formed. The filtered precipitate was washed with H<sub>2</sub>O (0.5 mL) to afford **Compound 4b** as an off-white solid (114 mg, 0.27 mmol, 78% yield).

<sup>1</sup>H NMR (600 MHz, DMSO) δ 7.91 (d, *J* = 8.6 Hz, 1H), 6.67 (s, 1H), 6.48 (d, *J* = 8.4 Hz, 1H), 6.40 (d, *J* = 8.3 Hz, 1H), 4.13 (t, *J* = 7.2 Hz, 1H), 3.80 (t, *J* = 6.6 Hz, 2H), 2.84 (t, *J* = 8.4 Hz, 2H), 2.20 – 2.09 (m, 2H), 2.05 – 1.99 (m, 1H), 1.65 – 1.60 (m, 2H), 1.50 – 1.44 (m, 2H), 1.38 – 1.34 (m, 2H), 1.30 – 1.24 (m, 10H), 0.86 (d, *J* = 6.8 Hz, 6H).

<sup>13</sup>C NMR (151 MHz, DMSO) δ 173.29, 172.51, 151.37, 146.38, 130.32, 112.77, 112.02, 108.89, 68.10, 57.04, 46.93, 34.97, 29.89, 29.77, 29.00, 28.94, 28.81, 28.78, 28.61, 25.60, 25.40, 19.20, 18.07.

HR-MS (ESI) calculated for C<sub>24</sub>H<sub>39</sub>N<sub>2</sub>O<sub>4</sub> [M+H]<sup>+</sup> *m/z* 419.2190, found 419.2189.

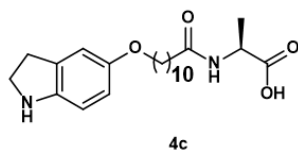

### Compound 4c

To a solution of Compound **3c** (0.14 g, 0.34 mmol, 1.0 equiv.) in methanol (2 mL) and THF (2 mL), an aqueous solution of NaOH (4M, 1 mL) was added the reaction mixture and then heated at 80 °C for 1 h. After cooling to room temperature, volatile solvents were removed under reduced pressure. The pH of reaction mixture was adjusted to ~7 by adding 1 M HCl solution that off-white precipitate formed. The filtered precipitate was washed with H<sub>2</sub>O (0.5 mL) to afford **Compound 4c** as an off-white solid (0.11 g, 0.28 mmol, 84 % yield).

<sup>1</sup>H NMR (400 MHz, 9 : 1 CDCl<sub>3</sub> with 0.03% v/v TMS : CD<sub>3</sub>OD) δ 6.70 (s, 1H), 6.66 – 6.62 (m, 1H), 6.57 – 6.54 (m, 1H), 4.39 – 4.33 (m, 1H), 3.82 (t, *J* = 6.3 Hz, 2H), 3.46 (t, *J* = 8.2 Hz, 2H), 2.98 – 2.32 (m, 2H), 2.14 – 2.09 (m, 2H), 1.69 – 1.62 (m, 2H), 1.54 – 1.50 (m, 2H), 1.38 – 1.30 (m, 5H), 1.26 – 1.20 (d, *J* = 11.6 Hz, 10H).

<sup>13</sup>C NMR (101 MHz, 9 : 1 CDCl<sub>3</sub> with 0.03% v/v TMS : CD<sub>3</sub>OD) δ 175.61, 173.76, 154.26, 142.77, 132.17, 113.45, 112.19, 112.10, 68.97, 47.33, 36.36, 30.38, 29.41, 29.31, 29.29, 29.24, 29.22, 29.17, 25.92, 25.61, 18.12.

HR-MS (ESI) calculated for C<sub>22</sub>H<sub>34</sub>N<sub>2</sub>O<sub>4</sub> [M+H]<sup>+</sup> *m/z* 391.2597, found 391.2598.

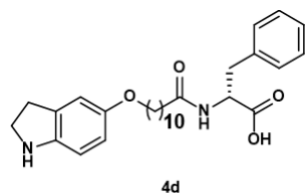

### Compound 4d

To a solution of Compound **3d** (114 mg, 0.24 mmol, 1.0 equiv.) in methanol (2 mL) and THF (2 mL), an aqueous solution of NaOH (4M, 1 mL) was added the reaction mixture and then heated at 80 °C for 1 h. After cooling to room temperature, volatile solvents were removed under reduced pressure. The pH of reaction mixture was adjusted to ~7 by adding 1 M HCl solution that off-white precipitate formed. The filtered precipitate was washed with H<sub>2</sub>O (0.5 mL) to afford **Compound 4d** as an off-white solid (83 mg, 0.18 mmol, 75% yield).

<sup>1</sup>H NMR (600 MHz, DMSO) δ 8.02 (d, *J* = 8.1 Hz, 1H), 7.25 – 7.16 (m, 5H), 6.67 (s, 1H), 6.48 (dd, *J* = 8.3, 2.5 Hz, 1H), 6.39 (d, *J* = 8.3 Hz, 1H), 4.38 – 4.35 (m, 1H), 3.80 (t, *J* = 6.5 Hz, 2H), 3.04 (dd, *J* = 13.8, 4.7 Hz, 1H), 2.85 – 2.80 (m, 3H), 2.01 (t, *J* = 7.3 Hz, 2H), 1.63 (p, *J* = 6.7 Hz, 2H), 1.39 – 1.16 (m, 12H), 1.12 – 1.08 (m, 2H).

<sup>13</sup>C NMR (151 MHz, DMSO) δ 173.24, 172.01, 151.36, 146.39, 138.01, 130.31, 129.13, 128.04, 126.24, 112.76, 112.02, 108.89, 68.09, 53.49, 46.94, 36.83, 35.16, 29.89, 29.02, 28.95, 28.91, 28.84, 28.82, 28.47, 25.61, 25.23.

HR-MS (ESI) calculated for C<sub>28</sub>H<sub>38</sub>N<sub>2</sub>O<sub>4</sub> [M+H]<sup>+</sup> *m/z* 467.2910, found 465.2911.

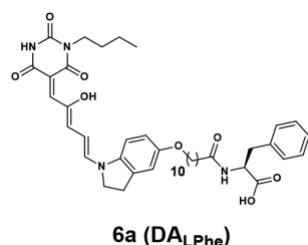

### Compound 6a (DALPhe)

Compound **4a** (89.63 mg, 0.192 mmol, 1.0 equiv.) and Compound **5** (50.41 mg, 0.192 mmol, 1.0 equiv.) were suspended in dichloromethane (0.8 mL). After hexafluoro-2-propanol (0.2 mL) was added, the reaction mixture was stirred at 20 °C for 24 h under air. Undissolved solid was filtered off and washed with THF solution. The filtrate was concentrated under reduced pressure. The residue was dissolved in THF (1 mL). After introducing *n*-hexane (10 mL), the recrystallized **Compound 6a (DALPhe)** (112 mg, 0.154 mmol, 80 % yield) was collected as a black solid.

<sup>1</sup>H NMR (400 MHz, THF) δ 12.49 – 12.31 (m, 0.4 H), 10.84 – 10.58 (m, 0.6 H), 10.11 – 9.94 (m, 0.5 H), 7.96 (d, *J* = 12.4 Hz, 1H), 7.65 (dd, *J* = 6.0, 2.1 Hz, 1H), 7.22 – 7.12 (m, 5H), 7.03 (d, *J* = 8.0 Hz, 0.83H), 6.87 (s, 0.42H), 6.81 (d, *J* = 11.3 Hz, 0.85H), 6.69 (s, 0.22H), 6.63 (d, *J* = 7.6 Hz, 0.23H), 6.52 – 6.48 (m, 0.39H), 6.41 (t, *J* = 7.7 Hz, 0.27H), 6.32 – 6.30 (m, 0.24H), 6.13 (t, *J* = 12.2 Hz, 0.5H), 5.29 (d, *J* = 27.5 Hz, 0.35H), 4.77 – 4.72 (m, 1H), 4.13 (t, *J* = 8.0 Hz, 1H), 3.94 (t,



$J = 6.4$  Hz, 1H), 3.88 – 3.72 (m, 2H), 3.27 – 3.11 (m, 3H), 2.98 – 2.92 (m, 2H), 2.07 (t,  $J = 7.4$  Hz, 2H), 1.54 – 1.44 (m, 6H), 1.36 – 1.22 (m, 12H), 0.95 – 0.85 (m, 3H).

HR-MS (ESI-) calculated for  $C_{41}H_{51}N_4O_8$   $[M-H]^-$   $m/z$  727.3707, found 727.3705.

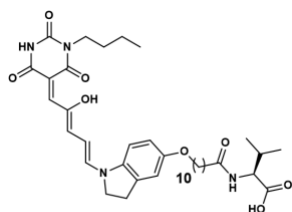

**6b (DALVal)**

### Compound 6b (DALVal)

Compound **4b** (50.2 mg, 0.120 mmol, 1.0 equiv.) and Compound **5** (31.4 mg, 0.120 mmol, 1.0 equiv.) were suspended in dichloromethane (0.8 mL). After hexafluoro-2-propanol (0.2 mL) was added, the reaction mixture was stirred at 20 °C for 24 h under air. Undissolved solid was filtered off and washed with THF solution. The filtrate was concentrated under reduced pressure. The residue was dissolved in THF (1 mL). After introducing *n*-hexane (10 mL), the recrystallized **Compound 6b (DALVal)** (73.2 mg, 0.11 mmol, 90 % yield) was collected as a black solid.

$^1H$  NMR (400 MHz, THF)  $\delta$  12.49 – 12.31(m, 0.9H), 10.85 – 10.58 (m, 1.1H), 10.11 – 9.95 (m, 0.8H), 7.96 (d,  $J = 12.4$  Hz, 0.59H), 7.65 (dd,  $J = 5.9, 2.0$  Hz, 0.26H), 7.18 (t,  $J = 7.7$  Hz, 0.93H), 6.98 (d,  $J = 9.0$  Hz, 0.88H), 6.87 (d,  $J = 2.4$  Hz, 0.51H), 6.84 – 6.77 (m, 0.97H), 6.69 (s, 0.26H), 6.52 – 6.48 (m, 0.42H), 6.41 (t,  $J = 7.8$  Hz, 0.34H), 6.32 – 6.30 (m, 0.25H), 6.16 – 6.10 (t,  $J = 12.2$  Hz, 0.59H), 5.29 (d,  $J = 26.5$  Hz, 0.5H), 4.73 (s, 1H), 4.48 (m, 1H), 4.13 (t,  $J = 7.9$  Hz, 1H), 3.86 – 3.80 (m, 2H), 3.26 (t,  $J = 8.1$  Hz, 2H), 2.93 – 2.82 (m, 1H), 2.15 (t,  $J = 7.4$  Hz, 2H), 1.62 – 1.51 (m, 6H), 1.38 – 1.28 (m, 12H), 0.95 – 0.87 (m, 9H).

HR-MS (ESI-) calculated for  $C_{41}H_{51}N_4O_8$   $[M-H]^-$   $m/z$  679.3707, found 679.3710.

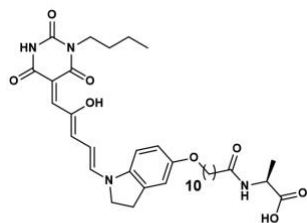

**6c (DALAla)**

### Compound 6c (DALAla)

Compound **4c** (77.8 mg, 0.20 mmol, 1.0 equiv.) and Compound **5** (52.2 mg, 0.20 mmol, 1.0 equiv.) were suspended in dichloromethane (0.8 mL). After hexafluoro-2-propanol (0.2 mL) was added, the reaction mixture was stirred at 20 °C for 24 h under air. Undissolved solid was filtered off and washed with THF solution. The filtrate was concentrated under reduced pressure. The residue was

dissolved in THF (1 mL). After introducing *n*-hexane (10 mL), the recrystallized **Compound 6c** (**DA<sub>LAla</sub>**) (78.3 mg, 0.12 mmol, 60 % yield) was collected as a black solid.

<sup>1</sup>H NMR (400 MHz, THF) δ 12.49 – 12.31(m, 0.56H), 10.85 – 10.58 (m, 0.91H), 10.11 – 9.95 (m, 0.75H), 7.97 (d, *J* = 12.2 Hz, 0.43H), 7.65 (dd, *J* = 5.9, 2.0 Hz, 0.2H), 7.20 – 7.10 (m, 2H), 6.87 (s, 0.44H), 6.83 – 6.80 (m, 0.91H), 6.69 – 6.62 (m, 0.5H), 6.52 – 6.48 (m, 0.39H), 6.41 (t, *J* = 7.7 Hz, 0.3H), 6.32 – 6.30 (m, 0.22H), 6.13 (t, *J* = 12.2 Hz, 0.51H), 5.32 – 5.26 (m, 0.44H), 4.73 (s, 0.29H), 4.45 (p, *J* = 7.3 Hz, 1H), 4.15 – 4.10 (m, 1H), 3.94 (t, *J* = 6.5 Hz, 1H), 3.86 – 3.79 (m, 2H), 3.28 – 3.21 (m, 2H), 2.10 (t, *J* = 7.4 Hz, 2H), 1.61 – 1.44 (m, 6H), 1.36 – 1.28 (m, 15H), 0.95 – 0.85 (m, 3H).

HR-MS (ESI-) calculated for C<sub>41</sub>H<sub>51</sub>N<sub>4</sub>O<sub>8</sub> [M-H]<sup>-</sup> *m/z* 651.3394, found 651.3397.

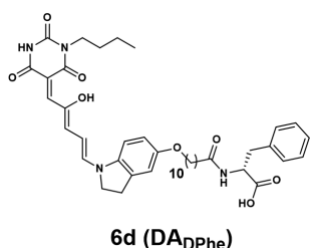

### Compound 6d (**DA<sub>DPh</sub>**)

Compound **4d** (73 mg, 0.16 mmol, 1.0 equiv.) and Compound **5** (41 mg, 0.16 mmol, 1.0 equiv.) were suspended in dichloromethane (0.8 mL). After hexafluoro-2-propanol (0.2 mL) was added, the reaction mixture was stirred at 20 °C for 24 h under air. Undissolved solid was filtered off and washed with THF solution. The filtrate was concentrated under reduced pressure. The residue was dissolved in THF (1 mL). After introducing *n*-hexane (10 mL), the recrystallized **Compound 6d** (**DA<sub>DPh</sub>**) (93 mg, 0.13 mmol, 82 % yield) was collected as a black solid.

<sup>1</sup>H NMR (600 MHz, DMSO) δ 12.72 – 12.46 (m, 0.98H), 10.93 – 10.80 (m, 0.39H), 8.56 – 8.50 (m, 0.43H), 8.11 (d, *J* = 8.2 Hz, 0.92H), 7.48 – 7.45 (m, 0.48H), 7.27 – 7.17 (m, 5H), 7.09 (d, *J* = 12.8 Hz, 0.48H), 6.99 (s, 0.49H), 6.94 (d, *J* = 9.0 Hz, 0.50H), 6.82 (s, 0.49H), 6.70 (d, *J* = 34.3 Hz, 0.34H), 6.51 (d, *J* = 64.2 Hz, 0.36H), 6.38 – 6.21 (m, 0.29H), 6.16 – 6.13 (m, 0.48H), 5.08 – 4.95 (m, 0.20), 4.43 – 4.39 (m, 1H), 4.25 (t, *J* = 7.7 Hz, 1H), 3.97 (t, *J* = 6.6 Hz, 1H), 3.80 – 3.70 (m, 2H), 3.25 (t, *J* = 7.8 Hz, 1H), 3.04 (dd, *J* = 13.8, 4.6 Hz, 1H), 2.84 – 2.80 (m, 1H), 2.02 (t, *J* = 7.4 Hz, 2H), 1.72 – 1.63 (m, 2H), 1.50 – 1.44 (m, 2H), 1.42 – 1.05 (m, 16H), 0.90 – 0.82 (m, 3H).

HR-MS (ESI-) calculated for C<sub>41</sub>H<sub>51</sub>N<sub>4</sub>O<sub>8</sub> [M-H]<sup>-</sup> *m/z* 727.3707, found 727.3710.

## 4. Supporting Figures

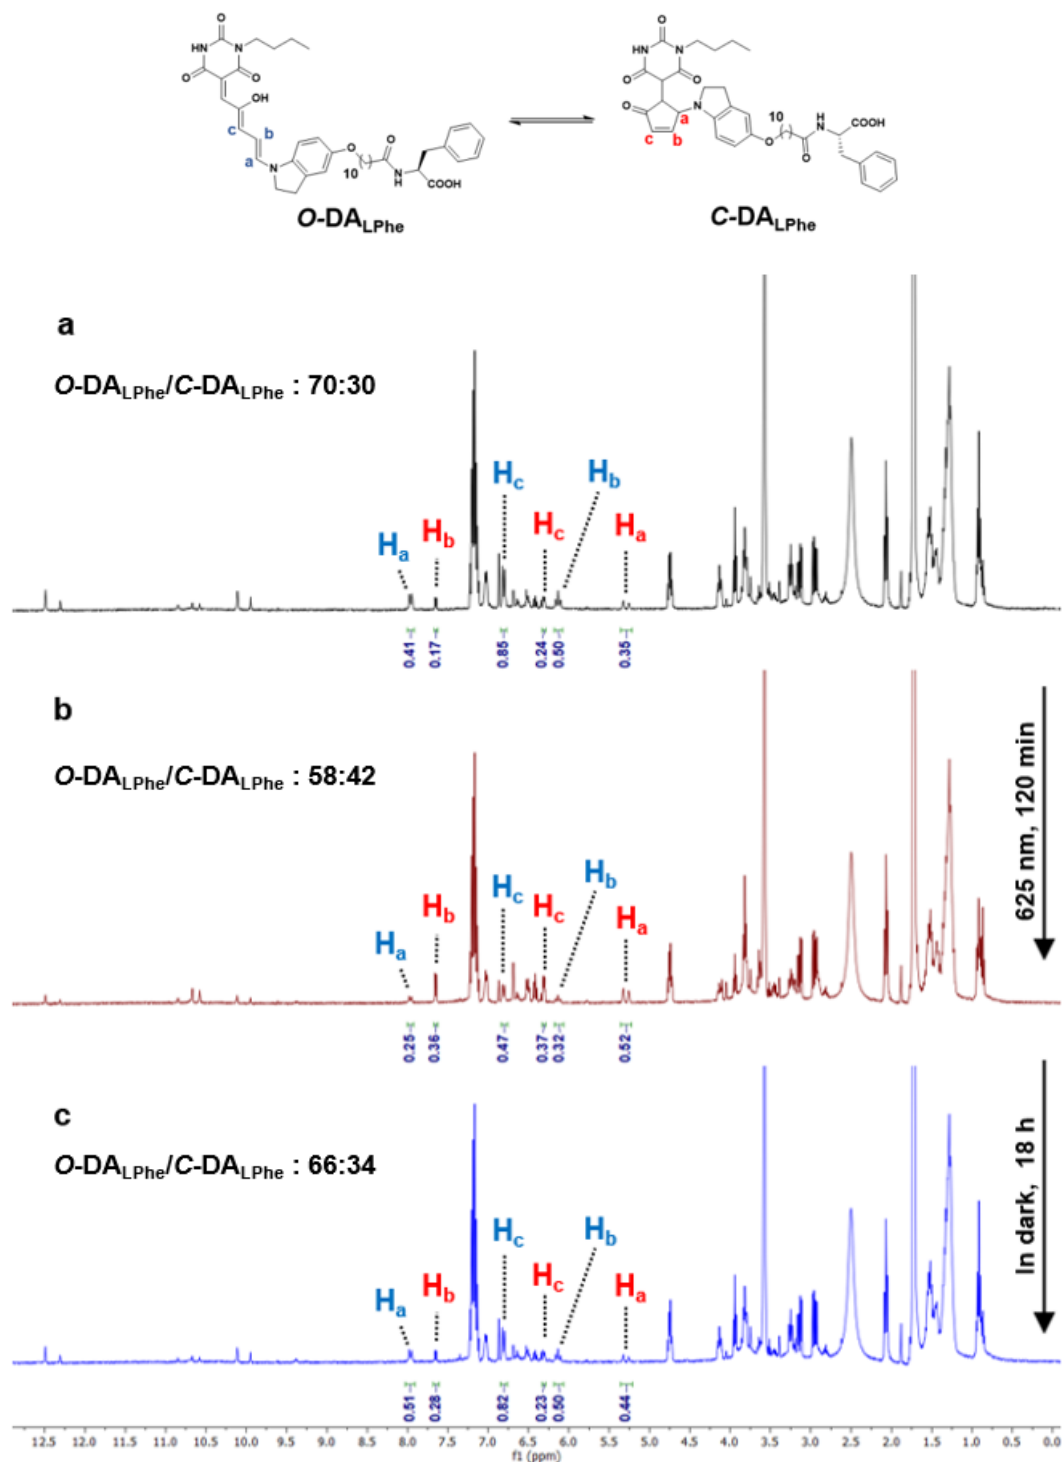

**Supplementary Fig. 1 | Stacked  $^1\text{H}$  NMR spectra of photoisomerisation and thermal recovery of  $\text{DALPhe}$ .** A  $\text{THF-}d_8$  solution of synthetically prepared  $\text{DALPhe}$  (5.65 mM, 400 MHz, 25 °C) **a** before irradiation (black), **b** after irradiation with 625 nm light for 120 min (red), and **c** thermal recovery at 20 °C in dark for 18 h (blue) were recorded.

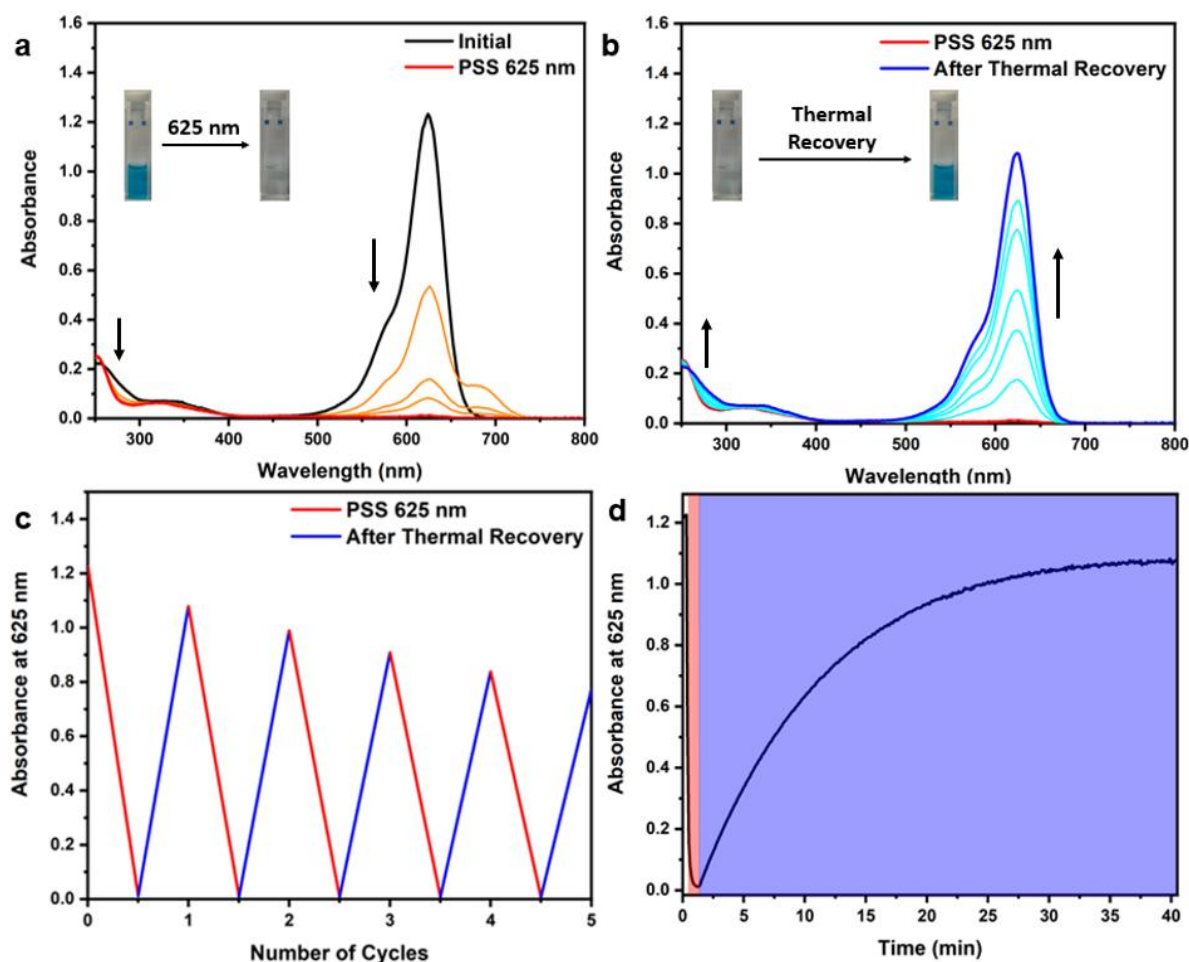

**Supplementary Fig. 2 | Photoisomerisation and thermal recovery of **DALVal** in THF solution.** UV-vis absorption spectra of **DALVal** in THF (20  $\mu$ M). **a** Absorption spectra of **DALVal** at initial (black-line), photoirradiation of 625 nm over 1 min (orange-line) and after reached PSS 625 nm for 1 min (red-line). **b** Absorption spectra of **DALVal** at PSS 625 nm (red-line), thermal recovery over 40 min (cyan-line) and after thermal recovery for 40 min (blue-line). **c** Multiple photoswitching cycles of **DALVal** in THF (20  $\mu$ M), alternative photoirradiation at 625 nm (red-line) for 1.0 min and thermal recovery for 40 min (blue-line). **d** Time-course of the photoisomerisation process of **DALVal** in THF, monitored at  $\lambda_{\max}$  625 nm of **DALVal** (red area: photoirradiation period and blue area: thermal recovery process).

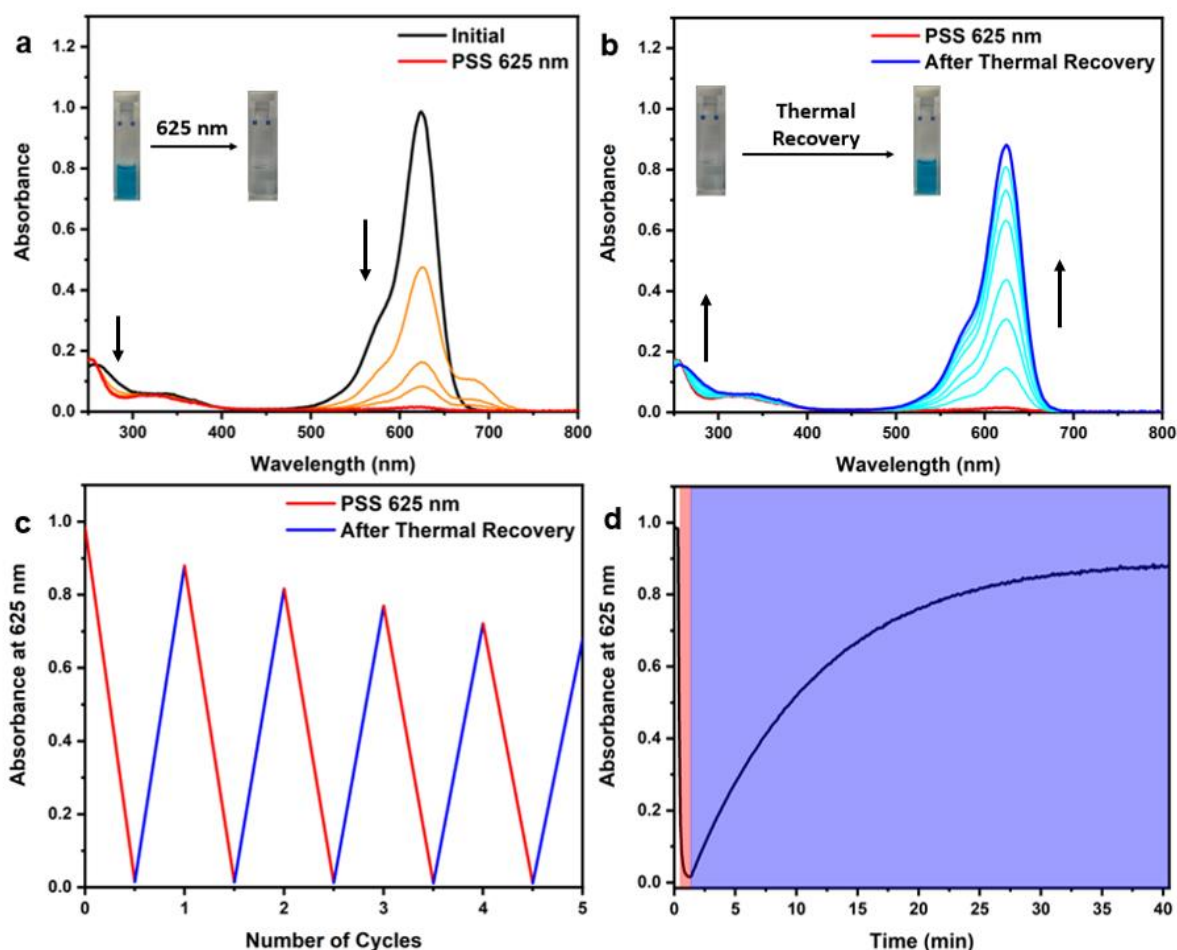

**Supplementary Fig. 3 | Photoisomerisation and thermal recovery of **DA<sub>L</sub>Ala** in THF solution.** UV-vis absorption spectra of **DA<sub>L</sub>Ala** in THF (20  $\mu$ M). **a** Absorption spectra of **DA<sub>L</sub>Ala** at initial (black-line), photoirradiation of 625 nm over 1 min (orange-line) and after reached PSS 625 nm for 1 min (red-line). **b** Absorption spectra of **DA<sub>L</sub>Ala** at PSS 625 nm (red-line), thermal recovery over 40 min (cyan-line) and after thermal recovery for 40 min (blue-line). **c** Multiple photoswitching cycles of **DA<sub>L</sub>Ala** in THF (20  $\mu$ M), alternative photoirradiation at 625 nm (red-line) for 1.0 min and thermal recovery for 40 min (blue-line). **d** Time-course of the photoisomerisation process of **DA<sub>L</sub>Ala** in THF, monitored at  $\lambda_{\text{max}}$  625 nm of **DA<sub>L</sub>Ala** (red area: photoirradiation period and blue area: thermal recovery period)

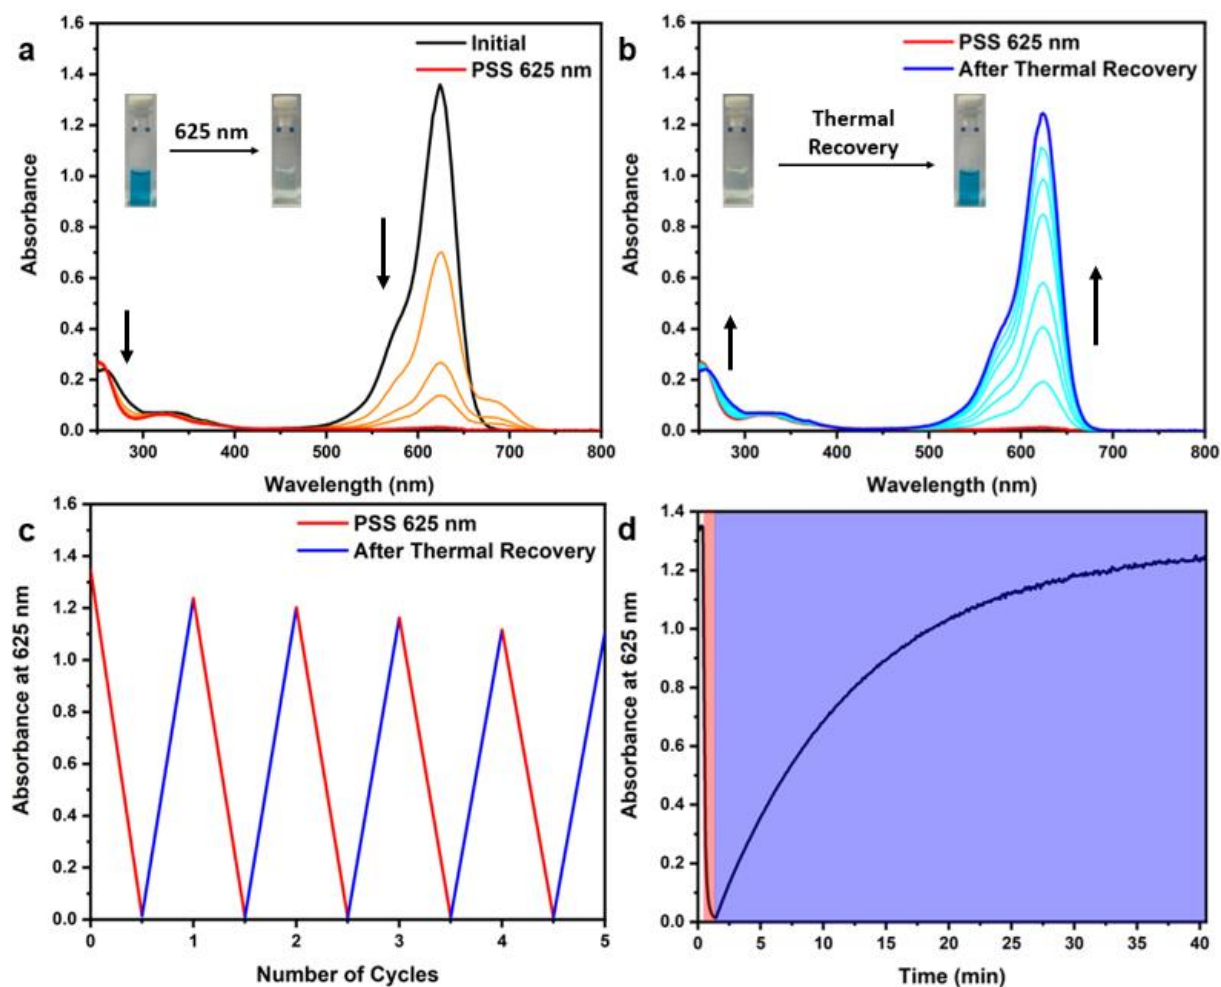

**Supplementary Fig. 4 | Photoisomerisation and thermal recovery of **DADphe** in THF solution.** UV-vis absorption spectra of **DADphe** in THF (20  $\mu$ M). **a** Absorption spectra of **DADphe** at initial (black-line), photoirradiation of 625 nm over 1 min (orange-line) and after reached PSS 625 nm for 1 min (red-line). **b** Absorption spectra of **DADphe** at PSS 625 nm (red-line), thermal recovery over 40 min (cyan-line) and after thermal recovery for 40 min (blue-line). **c** Multiple photoswitching cycles of **DADphe** in THF (20  $\mu$ M), alternative photoirradiation at 625 nm (red-line) for 1.0 min and thermal recovery for 40 min (blue-line). **d** Time-course of the photoisomerisation process of **DADphe** in THF, monitored at  $\lambda_{\text{max}}$  625 nm of **DADphe** (red area: photoirradiation period and blue area: thermal recovery period).

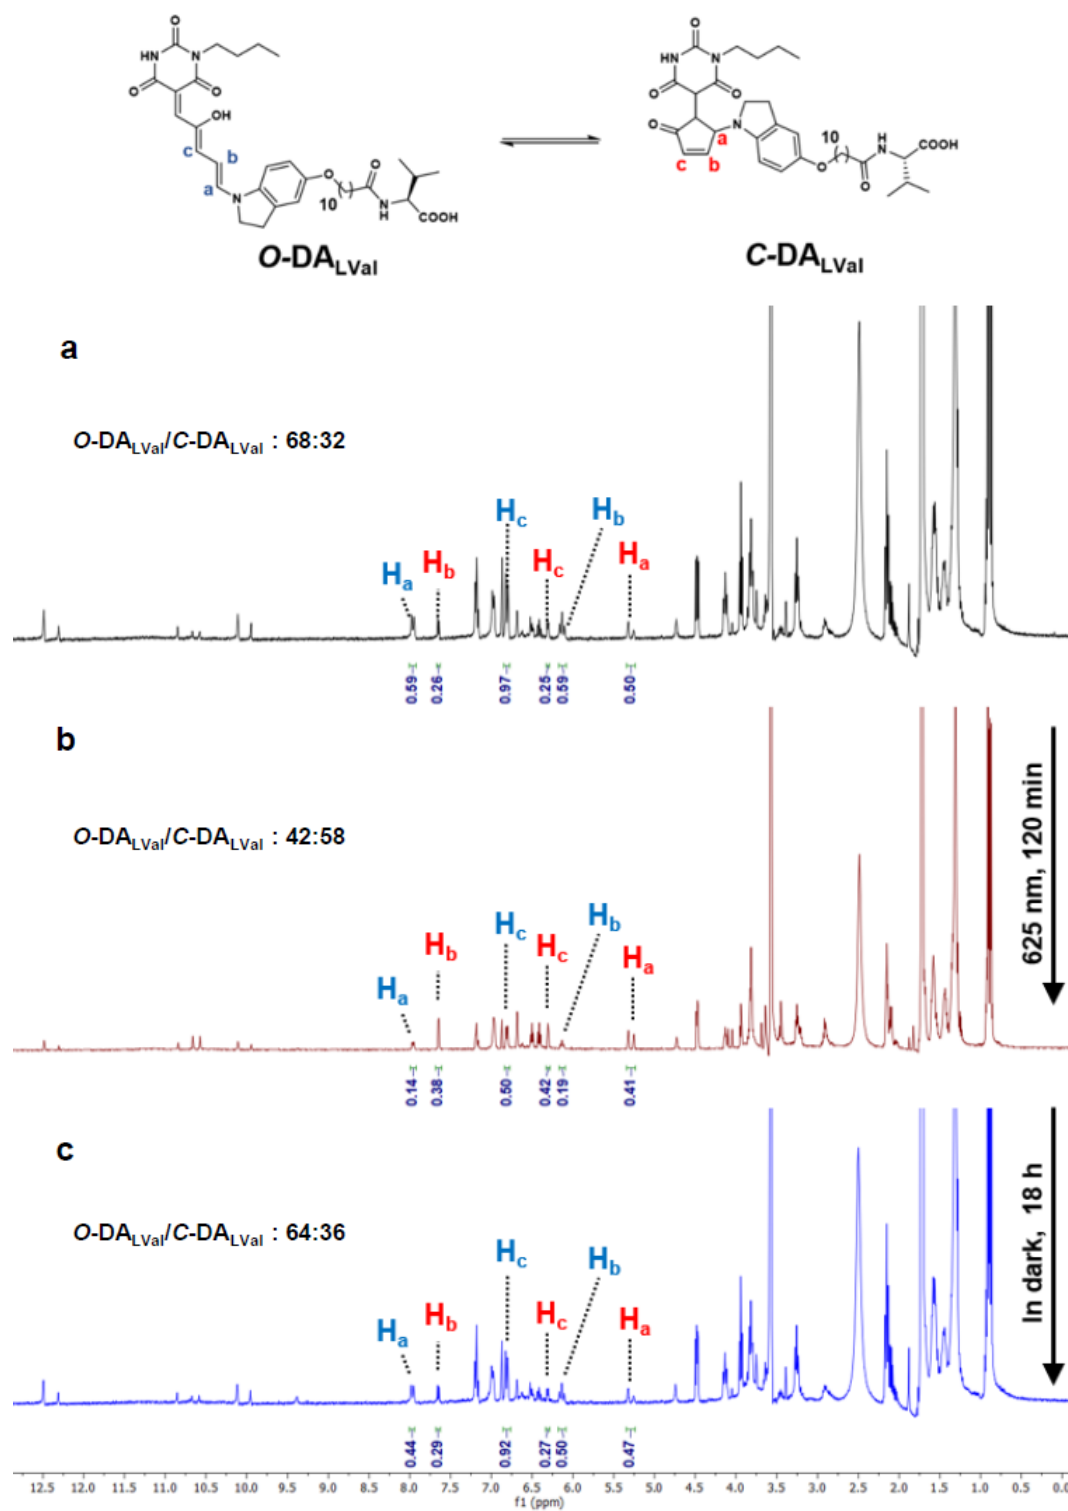

**Supplementary Fig. 5 | Stacked <sup>1</sup>H NMR spectra of photoisomerisation and thermal recovery of DA<sub>LVal</sub>.** A THF-*d*<sub>8</sub> solution of synthetically prepared DA<sub>LVal</sub> (5.7 mM 400 MHz, 25 °C). **a** before irradiation (black), **b** after irradiation with 625 nm light for 120 min (red), and **c** thermal recovery at 20 °C in dark for 18 h (blue) were recorded.

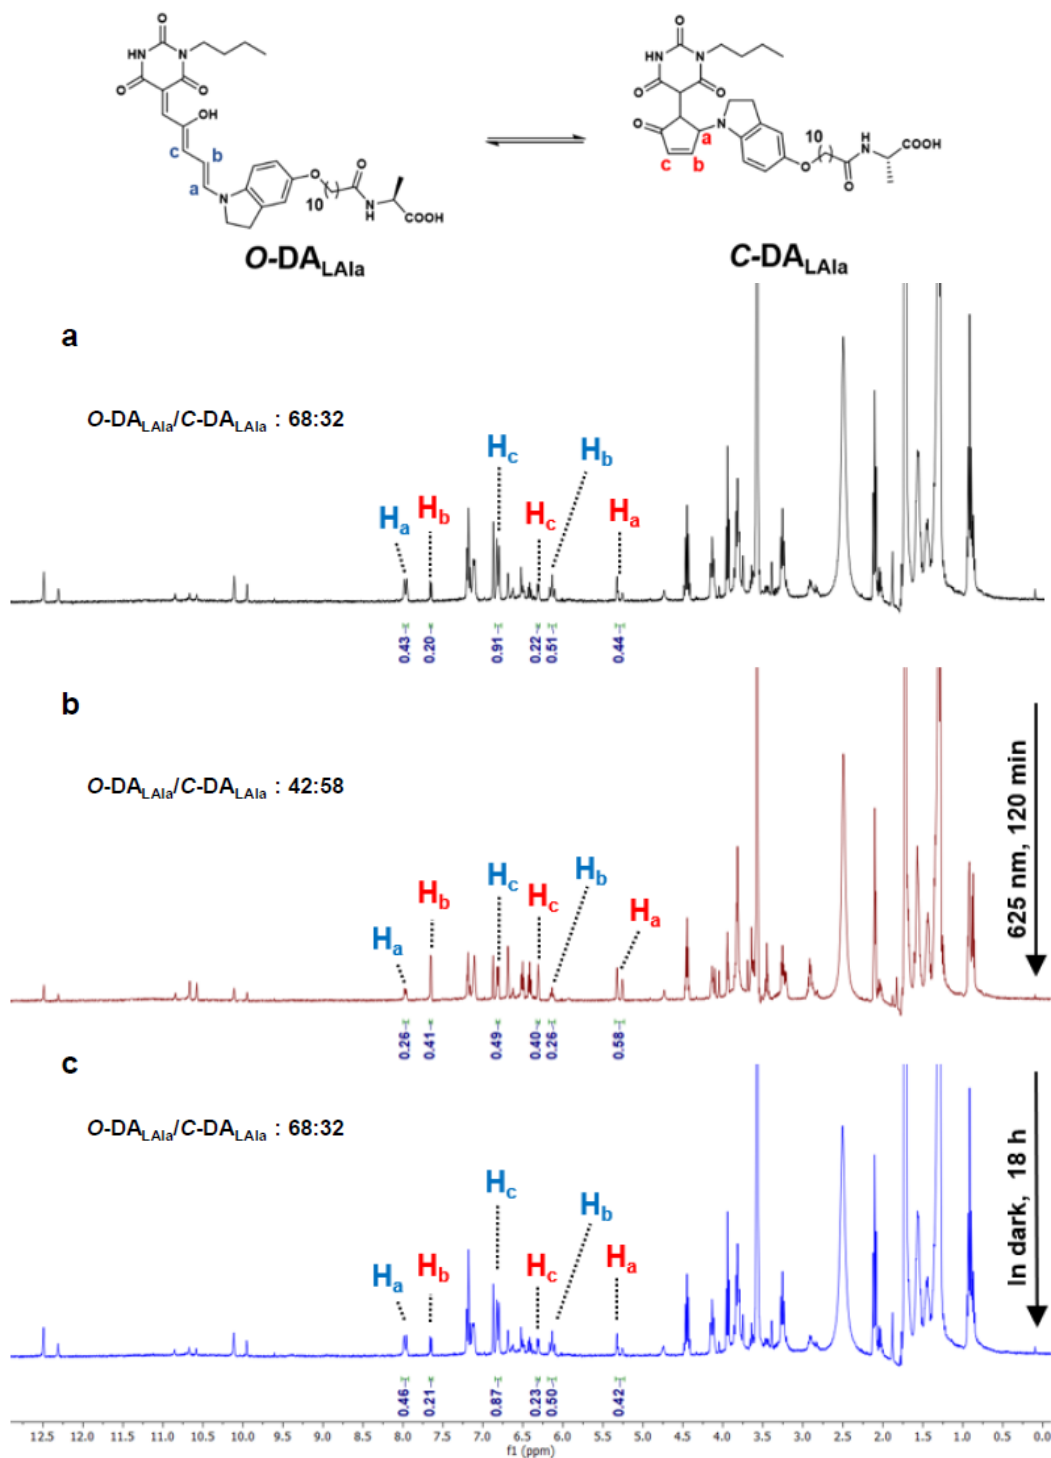

**Supplementary Fig. 6 | Stacked  $^1\text{H}$  NMR spectra of photoisomerisation and thermal recovery of  $\text{DA}_{\text{LAla}}$ .** A  $\text{THF-}d_8$  solution of synthetically prepared  $\text{DA}_{\text{LAla}}$  (5.9 mM, 400 MHz, 25 °C) **a** before irradiation (black), **b** after irradiation with 625 nm light for 120 min (red), and **c** thermal recovery at 20 °C in dark for 18 h (blue) were recorded.



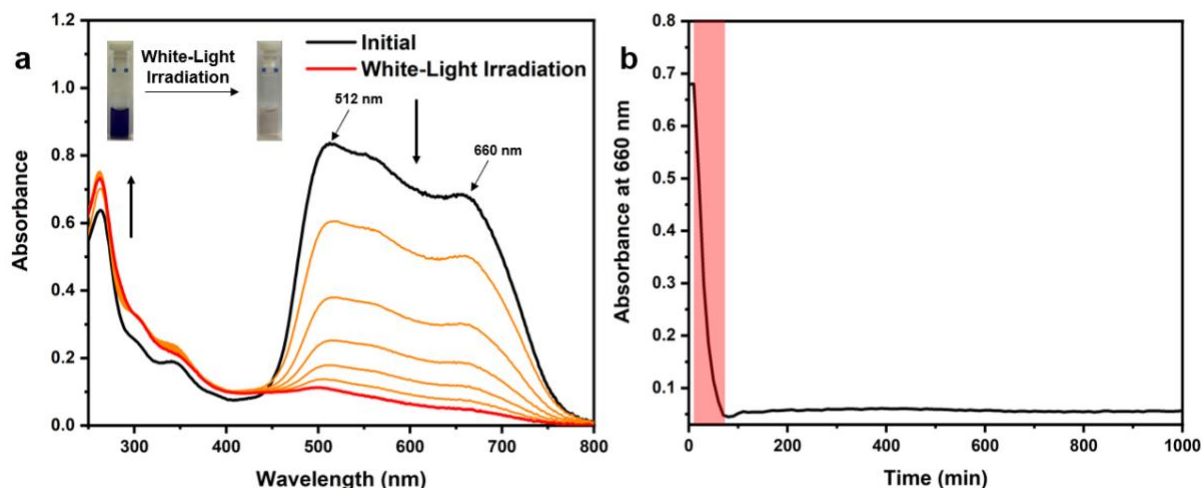

**Supplementary Fig. 7 | Photoisomerisation of  $\text{DADPhe}$  in aqueous solution.** UV-vis absorption spectra of  $\text{DADPhe}$  in aqueous solution ( $50 \mu\text{M}$ ). **a** before irradiation, upon white-light irradiation over 60 min (orange-line) and after white-light irradiation for 60 min (red-line). **b** Time-course of the white-light irradiation of an aqueous solution of  $\text{DADPhe}$ , monitored at 660 nm (black-line). Photoirradiation of UV-vis sample was carried out at  $20^\circ\text{C}$  using a light guide equipped BBZM-I xenon light source (380–800 nm, 300 W) positioned at a distance of 1 cm from the sample.

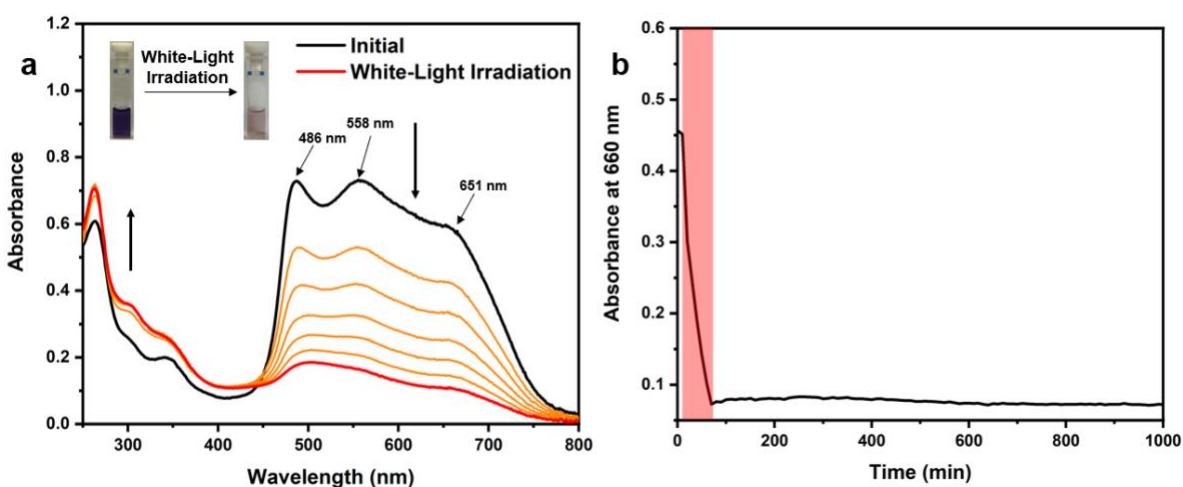

**Supplementary Fig. 8 | Photoisomerisation of  $\text{DALVal}$  in aqueous solution.** UV-vis absorption spectra of  $\text{DALVal}$  in aqueous solution ( $50 \mu\text{M}$ ). **a** before irradiation, upon white-light irradiation over 60 min (orange-line) and after white-light irradiation for 60 min (red-line). **b** Time-course of the white-light irradiation of an aqueous solution of  $\text{DALVal}$ , monitored at 660 nm (black-line). Photoirradiation of UV-vis sample was carried out at  $20^\circ\text{C}$  using a light guide equipped BBZM-I xenon light source (380–800 nm, 300 W) positioned at a distance of 1 cm from the sample.

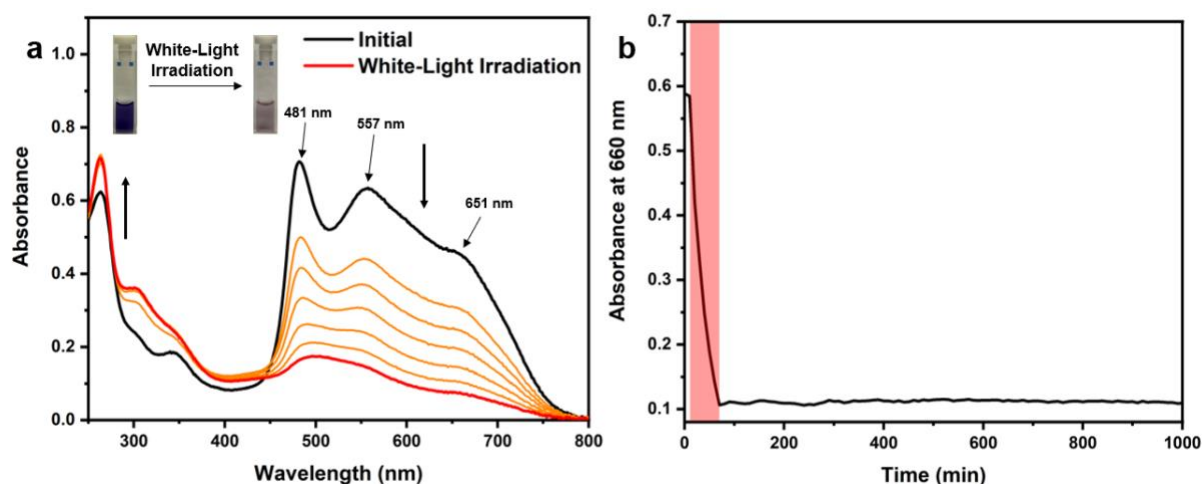

**Supplementary Fig. 9 | Photoisomerisation of DALaLa in aqueous solution.** UV-vis absorption spectra of DALaLa in aqueous solution (50  $\mu$ M). **a** before irradiation, upon white-light irradiation over 60 min (orange-line) and after white-light irradiation for 60 min (red-line). **b** Time-course of the white-light irradiation of an aqueous solution of DALaLa, monitored at 660 nm (black-line). Photoirradiation of UV-vis sample was carried out at 20  $^{\circ}$ C using a light guide equipped BBZM-I xenon light source (380–800 nm, 300 W) positioned at a distance of 1 cm from the sample.

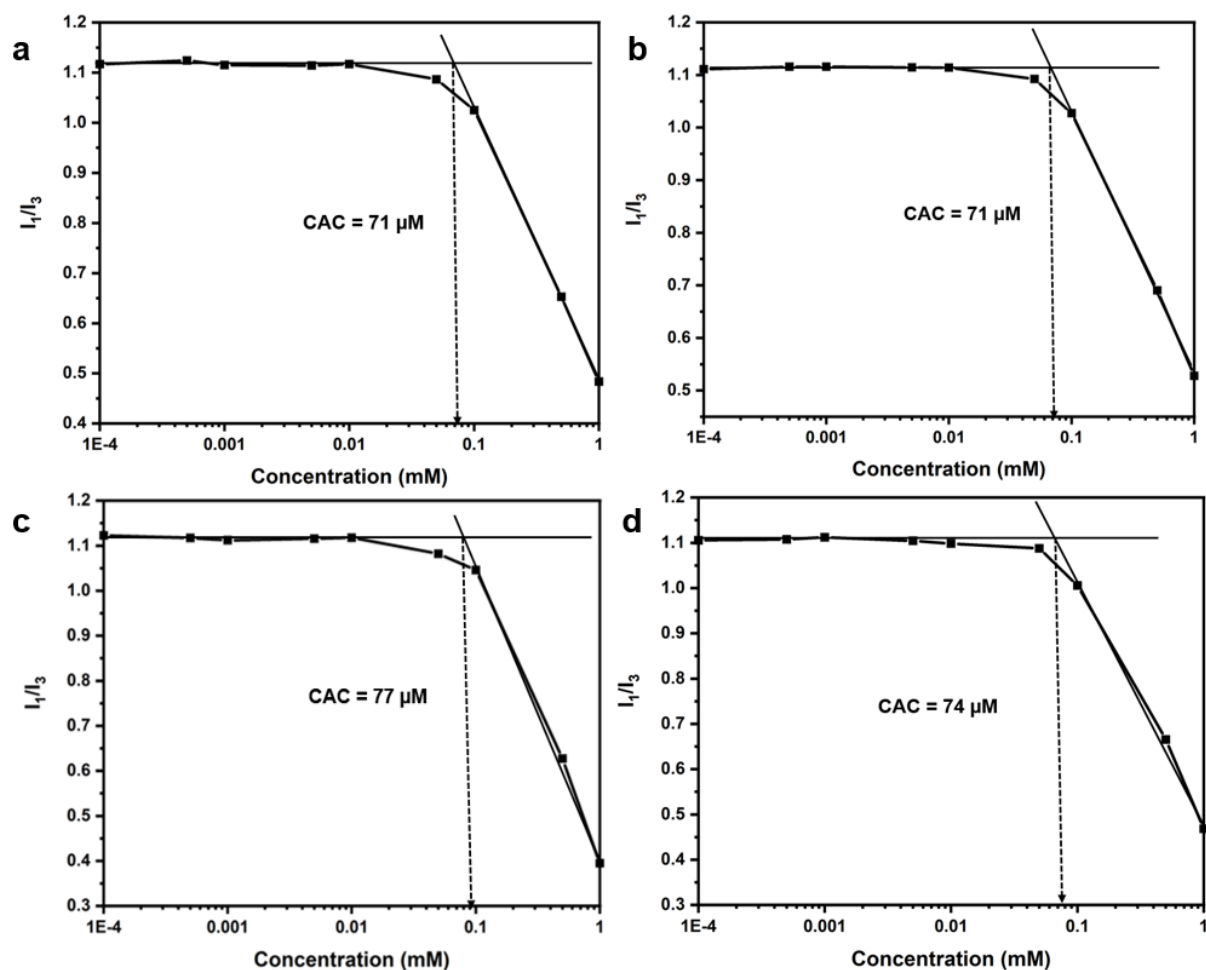

**Supplementary Fig. 10 | Pyrene Fluorescent Assay of  $\text{DA}_A$ .** Plot of pyrene fluorescence assay of  $I_{373}/I_{393}$  ratio for determination of the critical aggregation concentration of **a**  $\text{DA}_{\text{LPhc}}$ , **b**  $\text{DA}_{\text{DPhc}}$ , **c**  $\text{DA}_{\text{LVal}}$  and **d**  $\text{DA}_{\text{LAla}}$  with a ranged of concentration of  $1.0 \times 10^{-4}$  to 1.0 mM.

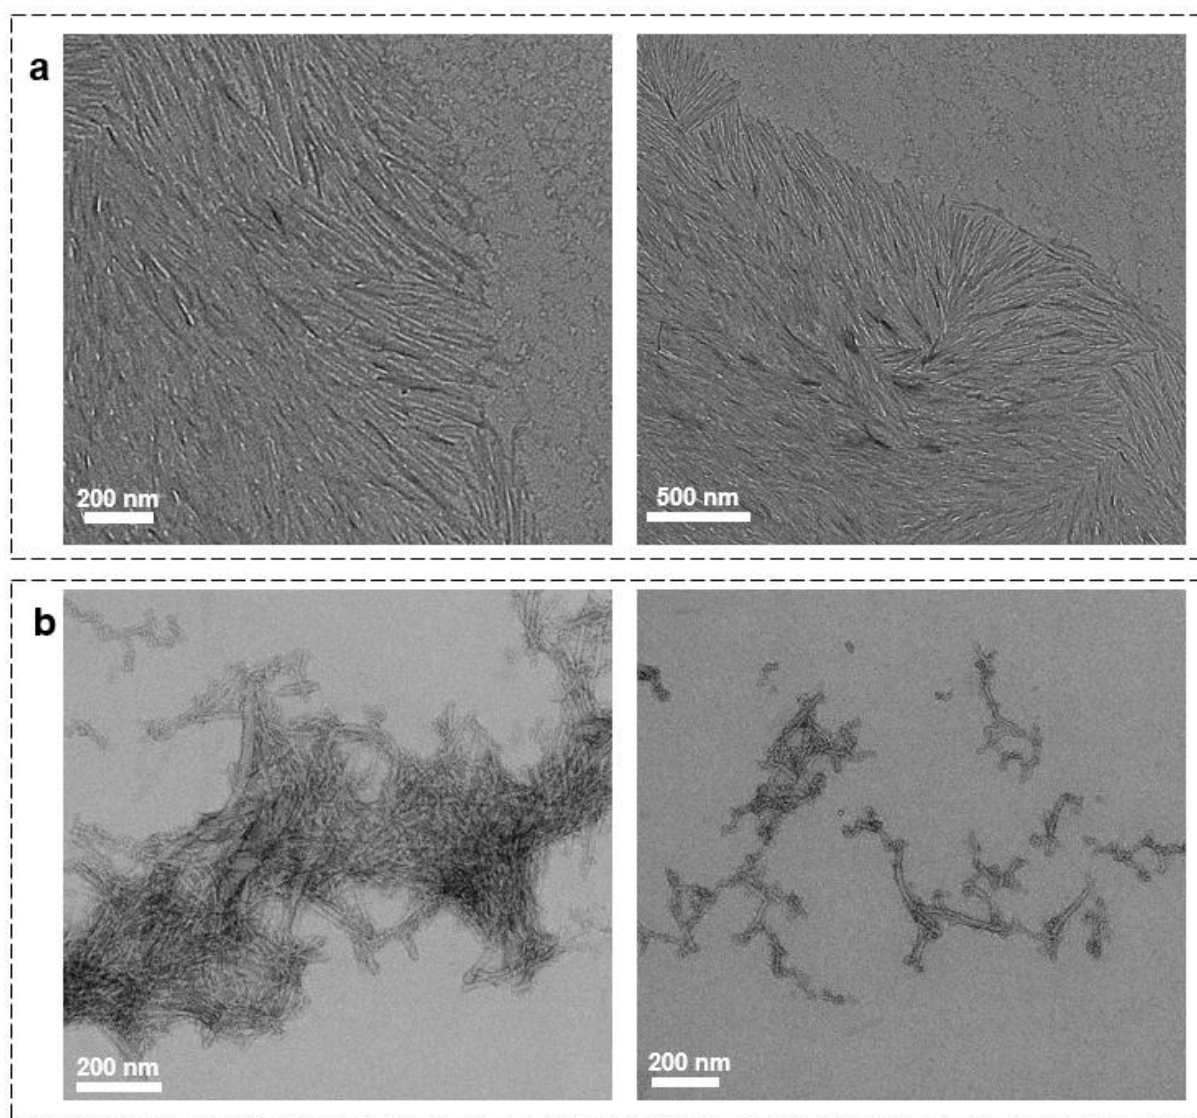

**Supplementary Fig. 11 | TEM images of DALPhe in aqueous solution.** Representative TEM images of aqueous solution of **a** DALPhe (0.25 wt.%, 3.43 mM) before and **b** after 60 min white light irradiation

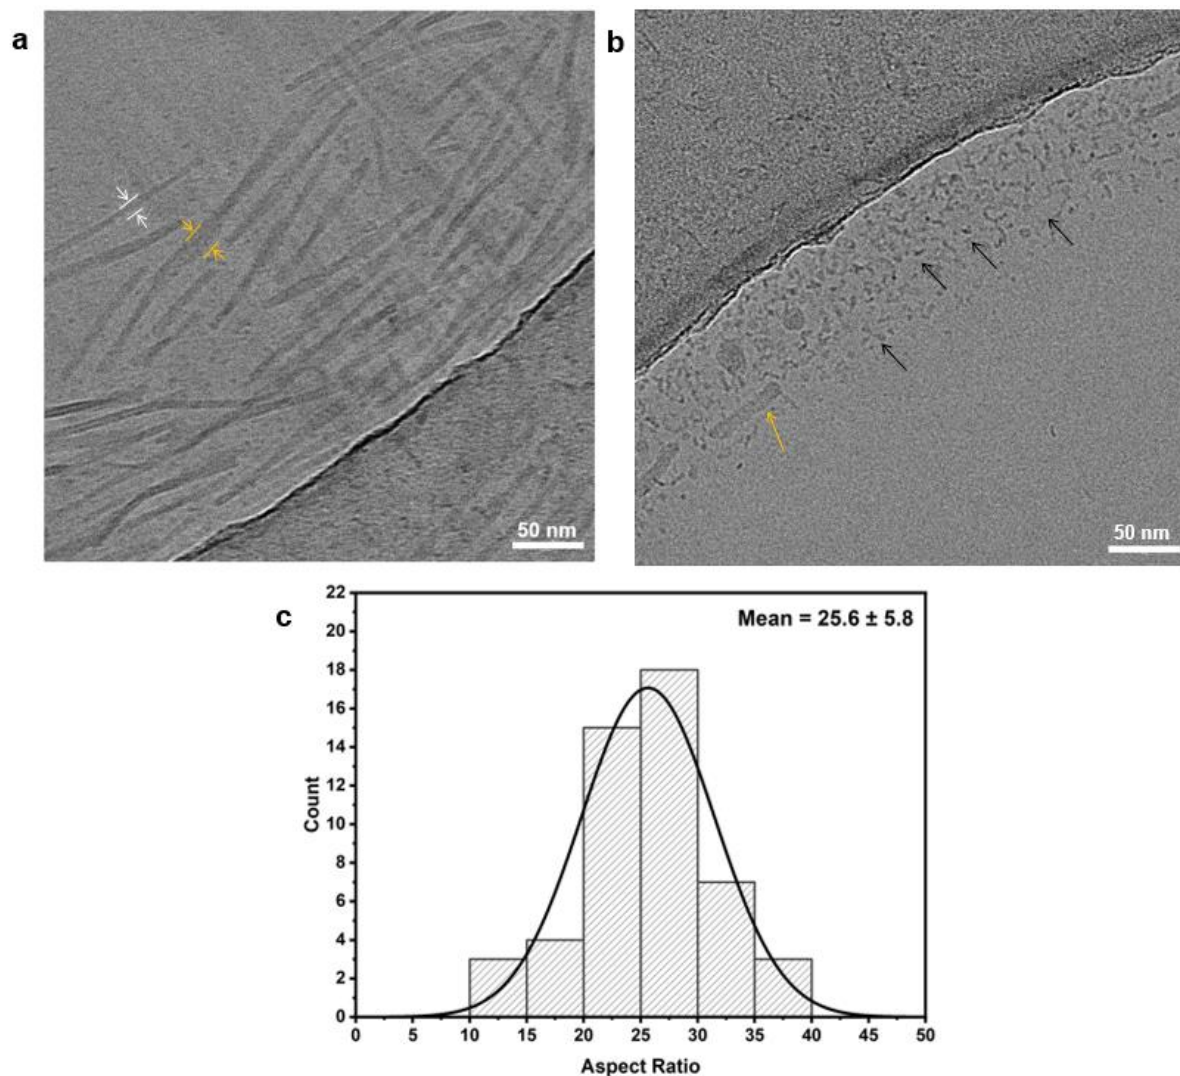

**Supplementary Fig. 12 | Cryo-TEM images of DADPhe in aqueous solution.** Representative of cryo-TEM images of DADPhe (1.0 wt. %, 13.7 mM) **a** before irradiation (yellow arrow: wide diameter and white arrow: narrow diameter) **b** after white light irradiation for 60 min (yellow arrows: shortened nanoribbon and black arrows: micelles). **c** Histogram profile of DADPhe aspect-ratio before irradiation.

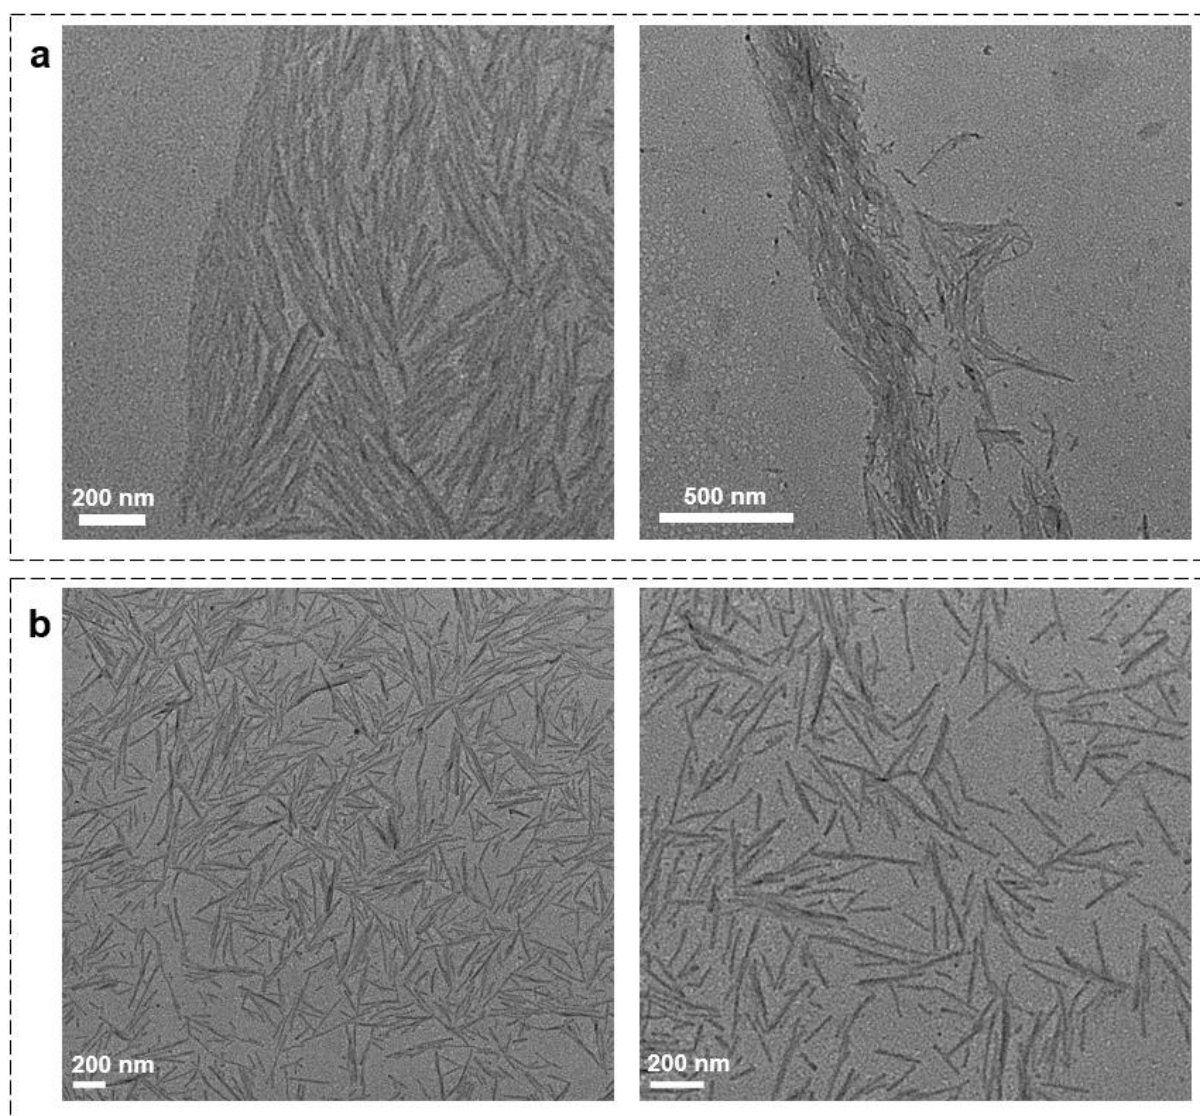

**Supplementary Fig. 13 | TEM images of DADPhe in aqueous solution.** Representative of TEM images of DADPhe (0.25 wt. %, 3.43 mM) **a** before and **b** after white light irradiation for 60 min.



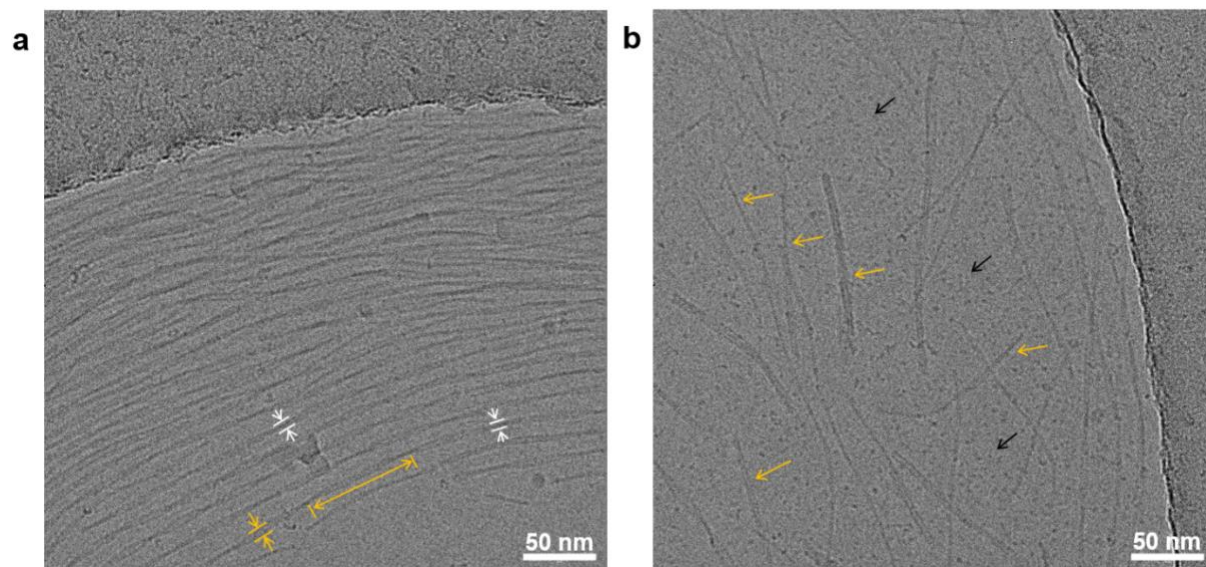

**Supplementary Fig. 14 | Cryo-TEM images of DALVal in aqueous solution.** Representative cryo-TEM images of aqueous solution of DALVal (1.0 wt.%, 14.7 mM) **a** before irradiation (white arrows: diameter of nanofibres and yellow arrows: helical pitch length). **b** After white light irradiation for 60 min (yellow arrows: shortened nanofibres and black arrows: micelles).

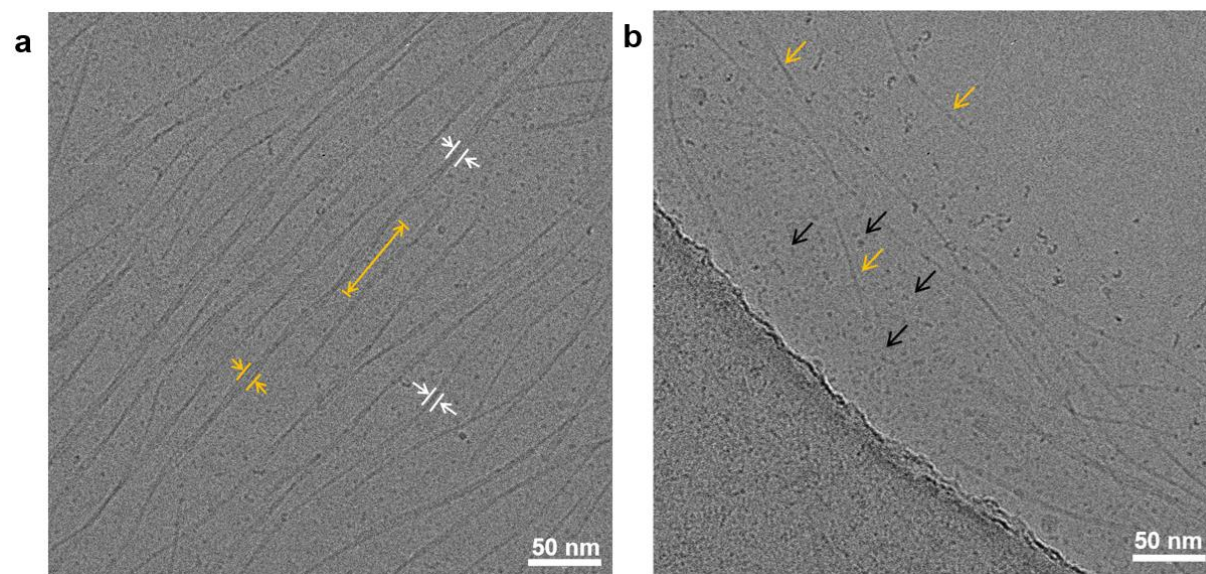

**Supplementary Fig. 15 | Cryo-TEM images of DALAla in aqueous solution.** Representative cryo-TEM images of aqueous solution of DALAla (1.0 wt.%, 15.3 mM) **a** before irradiation (white arrows: diameter of nanofibres and yellow arrows: helical pitch length). **b** After white light irradiation for 60 min (yellow arrows: shortened nanofibres and black arrows: micelles).

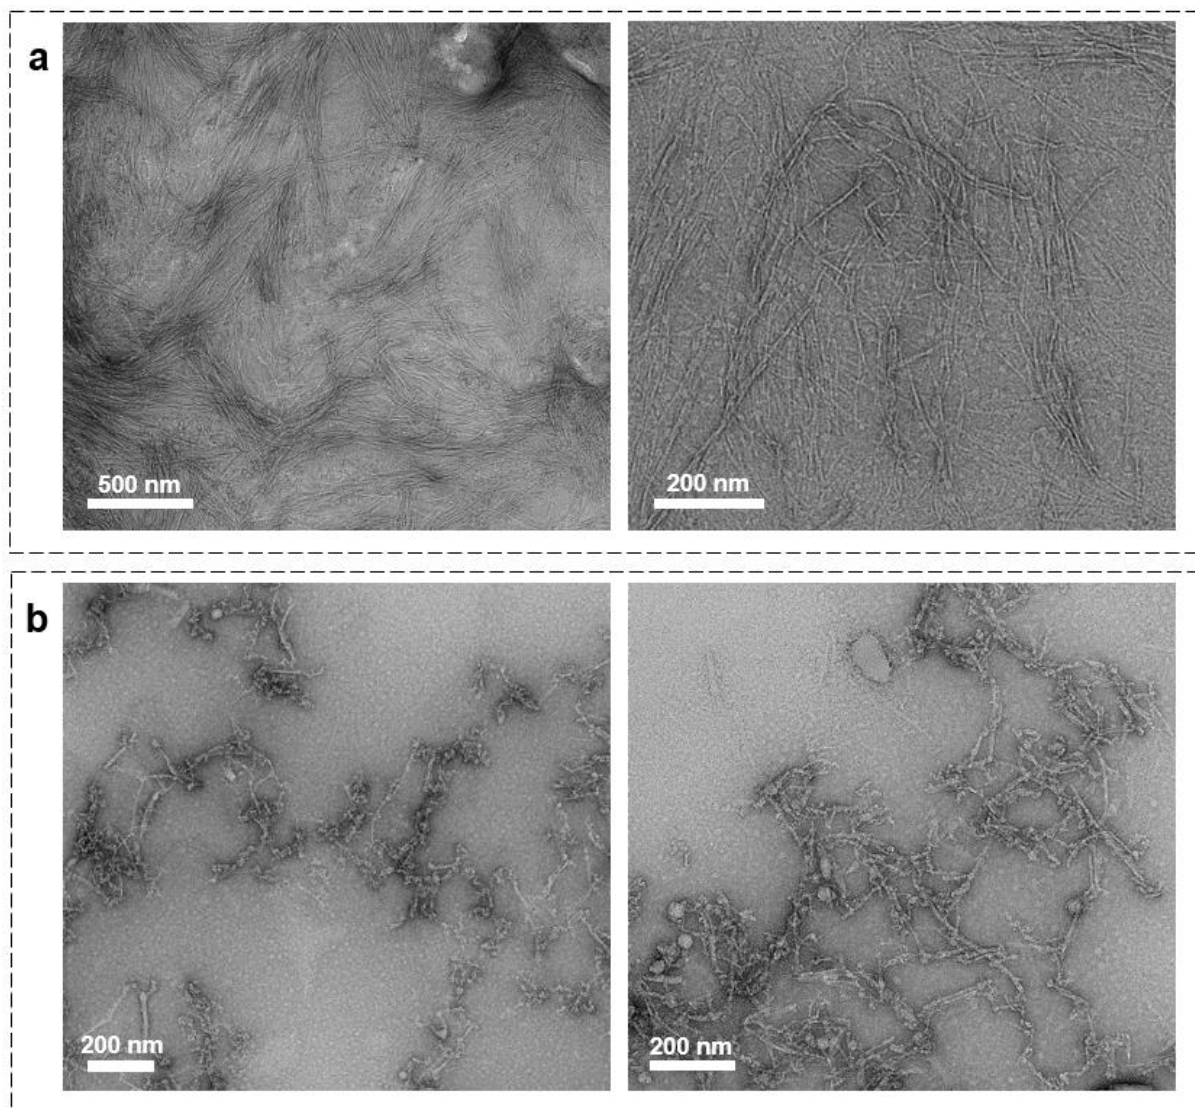

**Supplementary Fig. 16 | TEM images of DALVal in aqueous solution.** Representative of TEM images of DALVal (0.25 wt. %, 3.67 mM) **a** before and **b** after white light irradiation for 60 min.



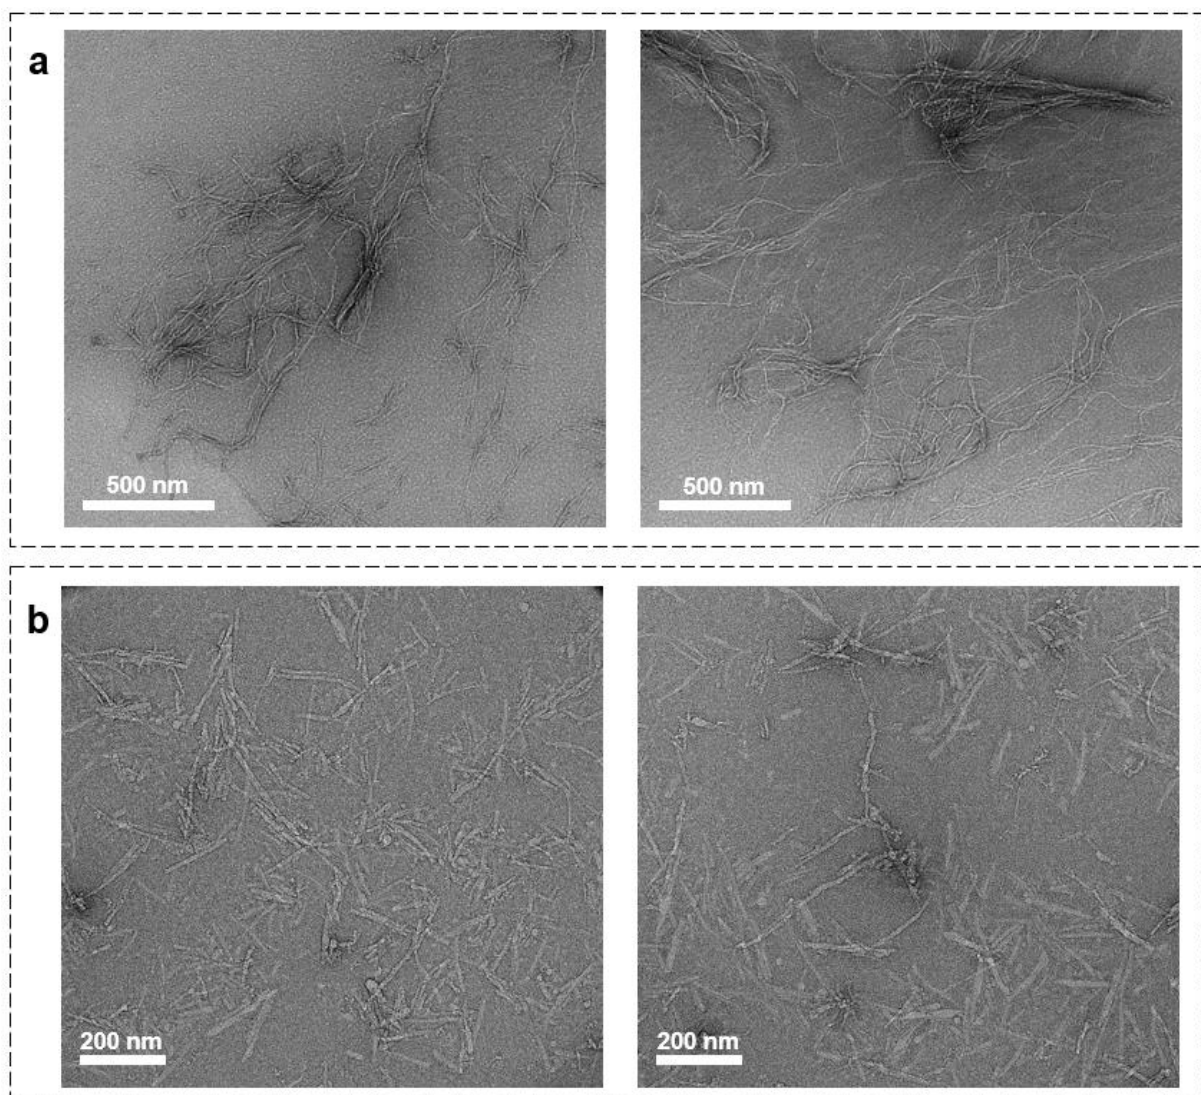

**Supplementary Fig. 17 | TEM images of DALaIa in aqueous solution.** Representative of TEM images of DALaIa (0.25 wt. %, 3.83 mM) **a** before irradiation and **b** after white light irradiation for 60 min.

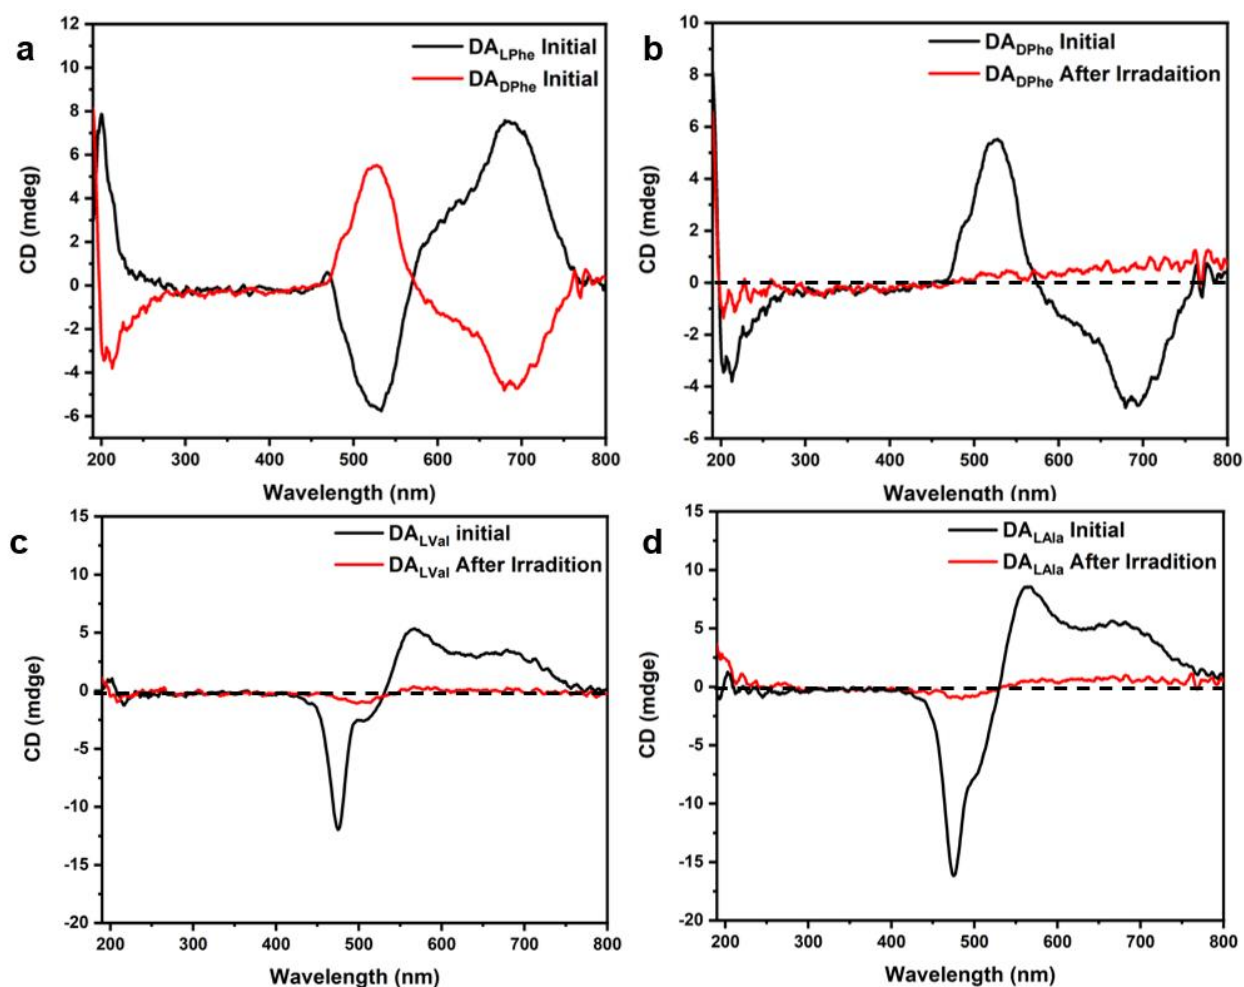

**Supplementary Fig. 18 | Circular dichroism of  $DA_A$  in aqueous solution.** **a** Complementary circular dichroism spectrum of  $DA_{DPhe}$  and  $DA_{LPhe}$  in aqueous solution before photoirradiation. **b** Circular dichroism spectra of the aqueous solution of  $DA_{DPhe}$  (50  $\mu$ M, black-line) and after white-light irradiation for 60 min (red-line). **c** Circular dichroism spectra of the aqueous solution of  $DA_{LVal}$  (50  $\mu$ M, black-line) and after white-light irradiation for 60 min (red-line). **d** Circular dichroism spectra of the aqueous solution of  $DA_{LAla}$  (50  $\mu$ M, black-line) and after white-light irradiation for 60 min (red-line).

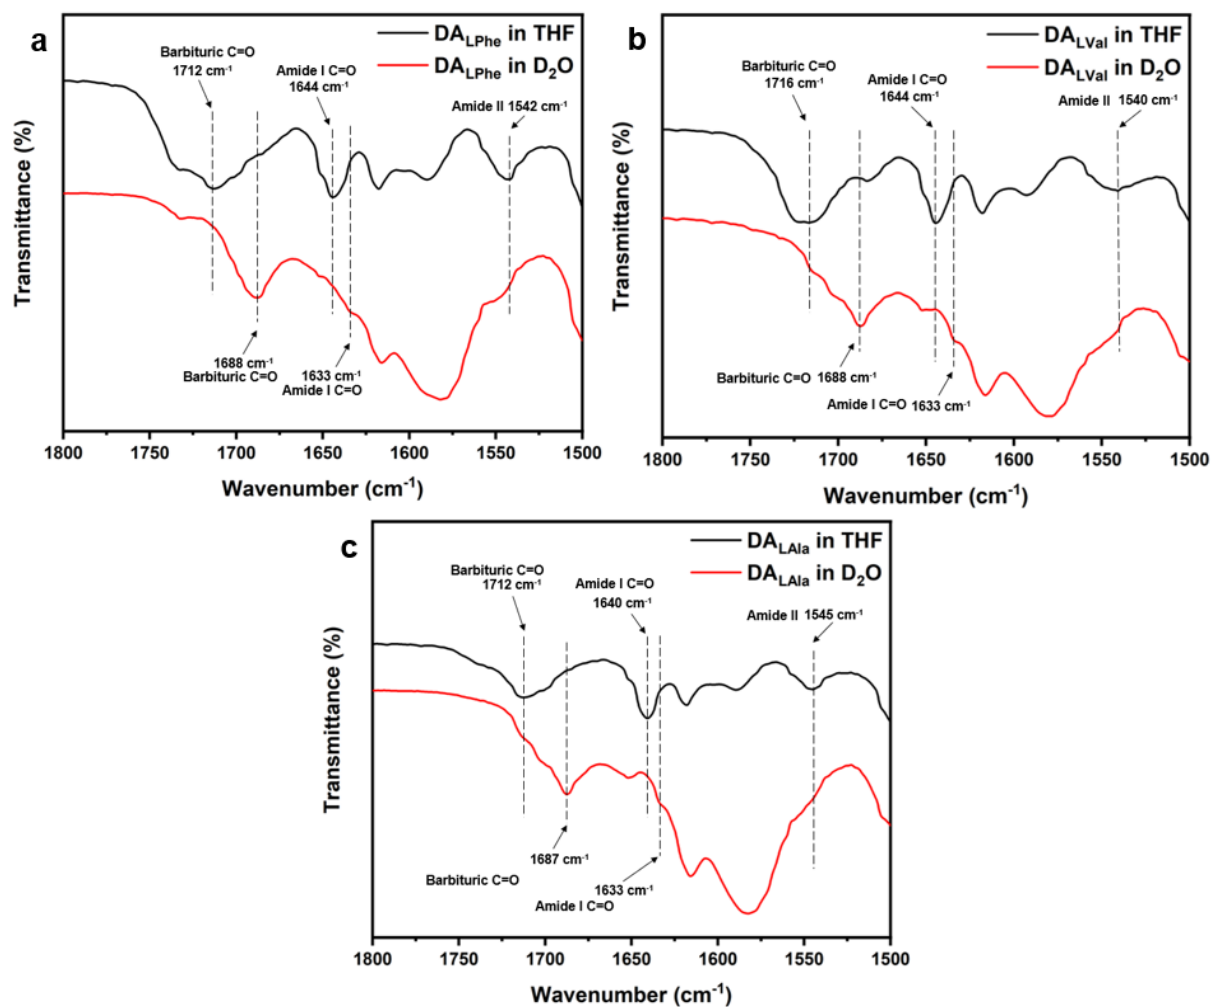

**Supplementary Fig. 19 | FTIR of DA<sub>A</sub> in organic and aqueous solution.** Partial FTIR spectra of **a** DA<sub>L</sub>Phe in THF and D<sub>2</sub>O (8 wt.%), **b** DA<sub>L</sub>Val in THF and D<sub>2</sub>O (8 wt.%) and **c** DA<sub>L</sub>Ala in THF and D<sub>2</sub>O (8 wt.%), recorded at 20 °C.

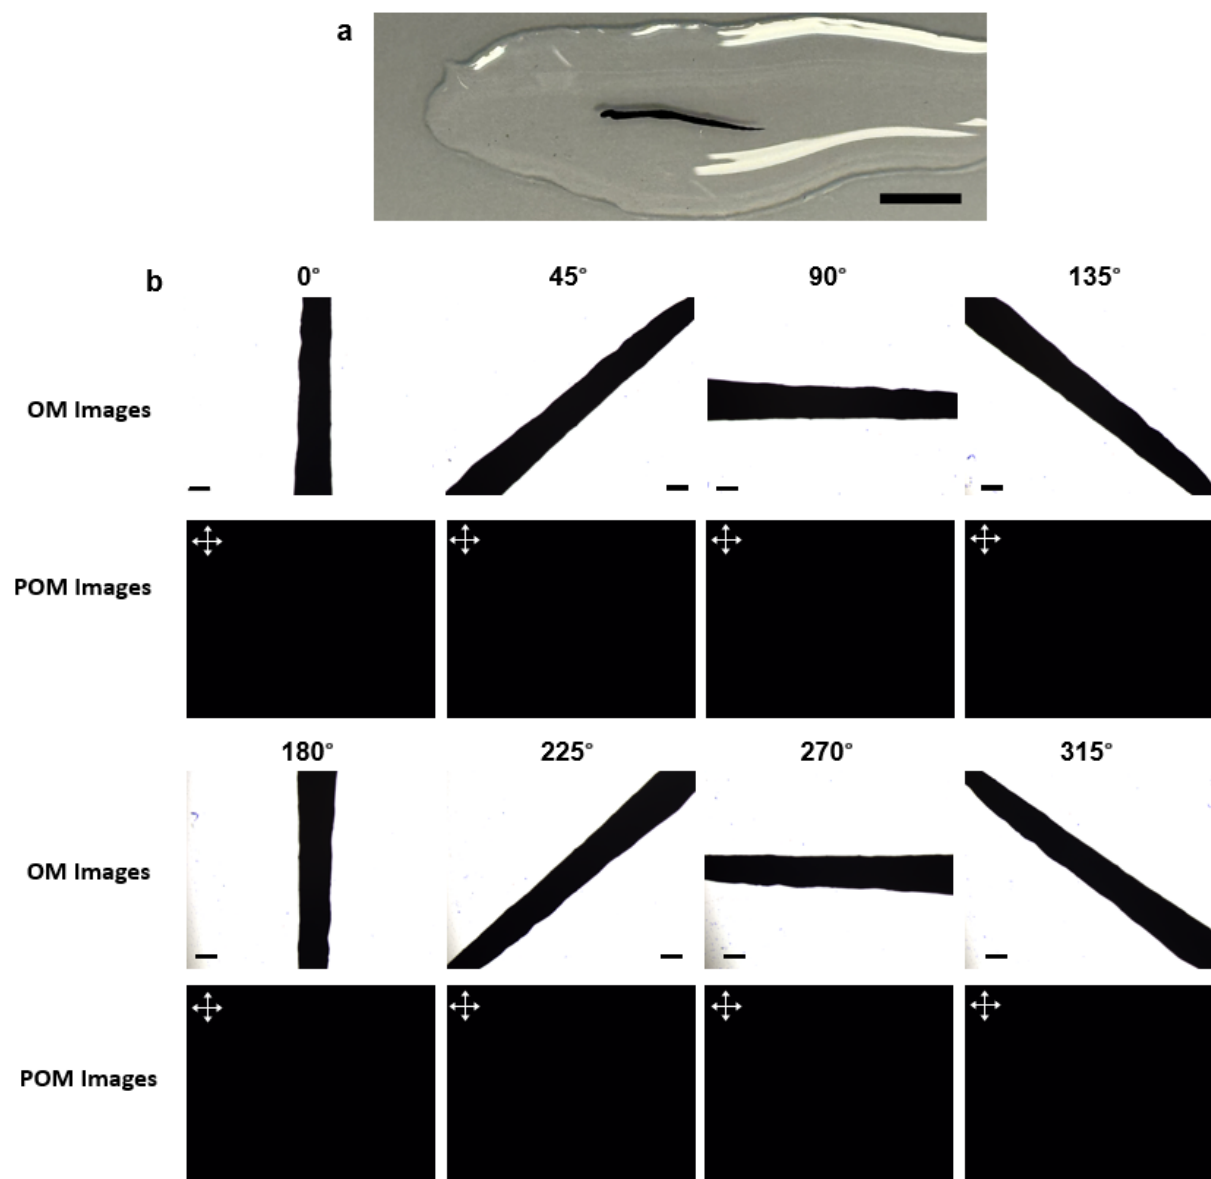

**Supplementary Fig. 20 | Fabrication of macroscopic soft scaffold of  $\text{DALPhe}$  and optical microscopic images of a macroscopic soft scaffold of  $\text{DALPhe}$  under crossed polarisers. a** Snapshot of a macroscopic soft scaffold of  $\text{DALPhe}$  (5.0 wt.%) prepared from an aqueous solution of  $\text{CaCl}_2$  (150 mM), Scale bar 0.5 cm. **b** Optical microscopic images of a macroscopic soft scaffold of  $\text{DALPhe}$  (5.0 wt.%) prepared from a solution of  $\text{CaCl}_2$  (150 mM) under crossed polarisers. The POM and OM images of the soft scaffold were tilted at 0°, 45°, 90°, 135°, 180°, 225°, 270° and 315° relative to the transmission axis of the analyser. Scale bar 200  $\mu\text{m}$  for all panels.

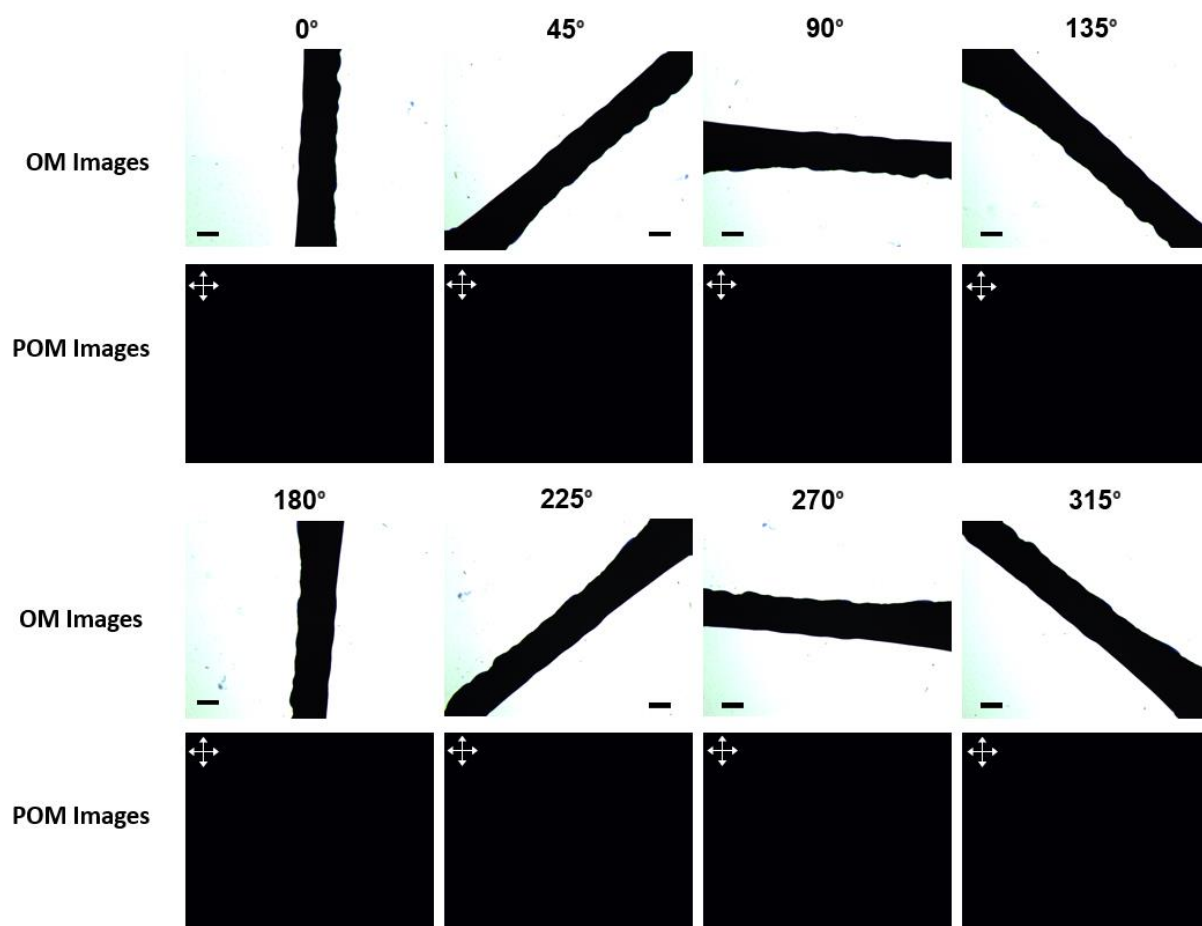

**Supplementary Fig. 21 | Optical microscopic images of a macroscopic soft scaffold of DALVal under crossed polarisers.** Optical microscopic images of a macroscopic soft scaffold of DALVal (5.0 wt.%) prepared from a solution of CaCl<sub>2</sub> (150 mM) under crossed polarisers. The POM and OM images of the soft scaffold were tilted at 0°, 45°, 90°, 135°, 180°, 225°, 270° and 315° relative to the transmission axis of the analyser. Scale bar 200  $\mu$ m for all panels.

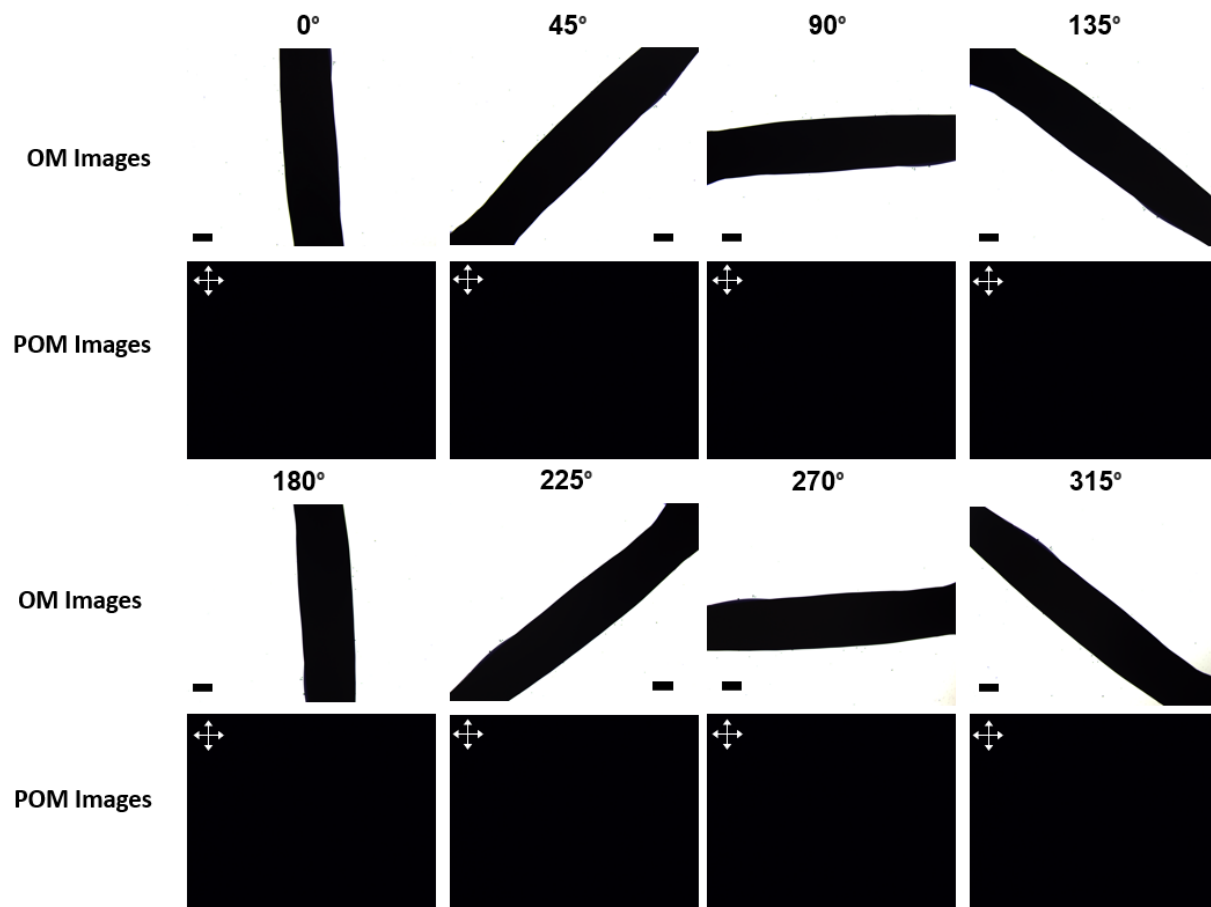

**Supplementary Fig. 22 | Optical microscopic images of a macroscopic soft scaffold of DA<sub>LALA</sub> under crossed polarisers.** Optical microscopic images of a macroscopic soft scaffold of DA<sub>LALA</sub> (5.0 wt.%) prepared from a solution of CaCl<sub>2</sub> (150 mM) under crossed polarisers. The POM and OM images of the soft scaffold were tilted at 0°, 45°, 90°, 135°, 180°, 225°, 270° and 315° relative to the transmission axis of the analyser. Scale bar 200 μm for all panels.

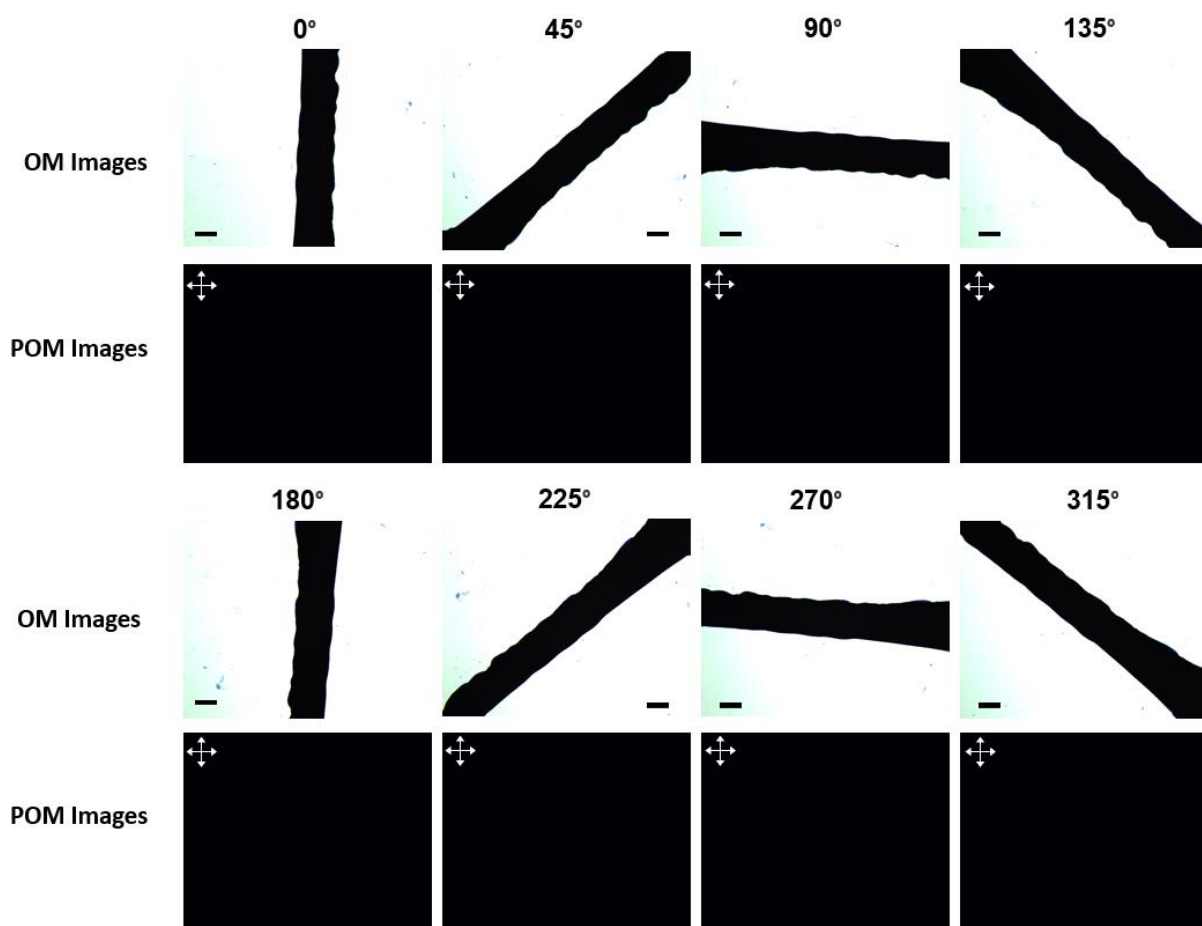

**Supplementary Fig. 23 | Optical microscopic images of a macroscopic soft scaffold of **DADPhe** under crossed polarisers.** Optical microscopic images of a macroscopic soft scaffold of **DADPhe** (5.0 wt.%) prepared from a solution of  $\text{CaCl}_2$  (150 mM) under crossed polarisers. The POM and OM images of the soft scaffold were tilted at 0°, 45°, 90°, 135°, 180°, 225°, 270° and 315° relative to the transmission axis of the analyser. Scale bar 200  $\mu\text{m}$  for all panels.

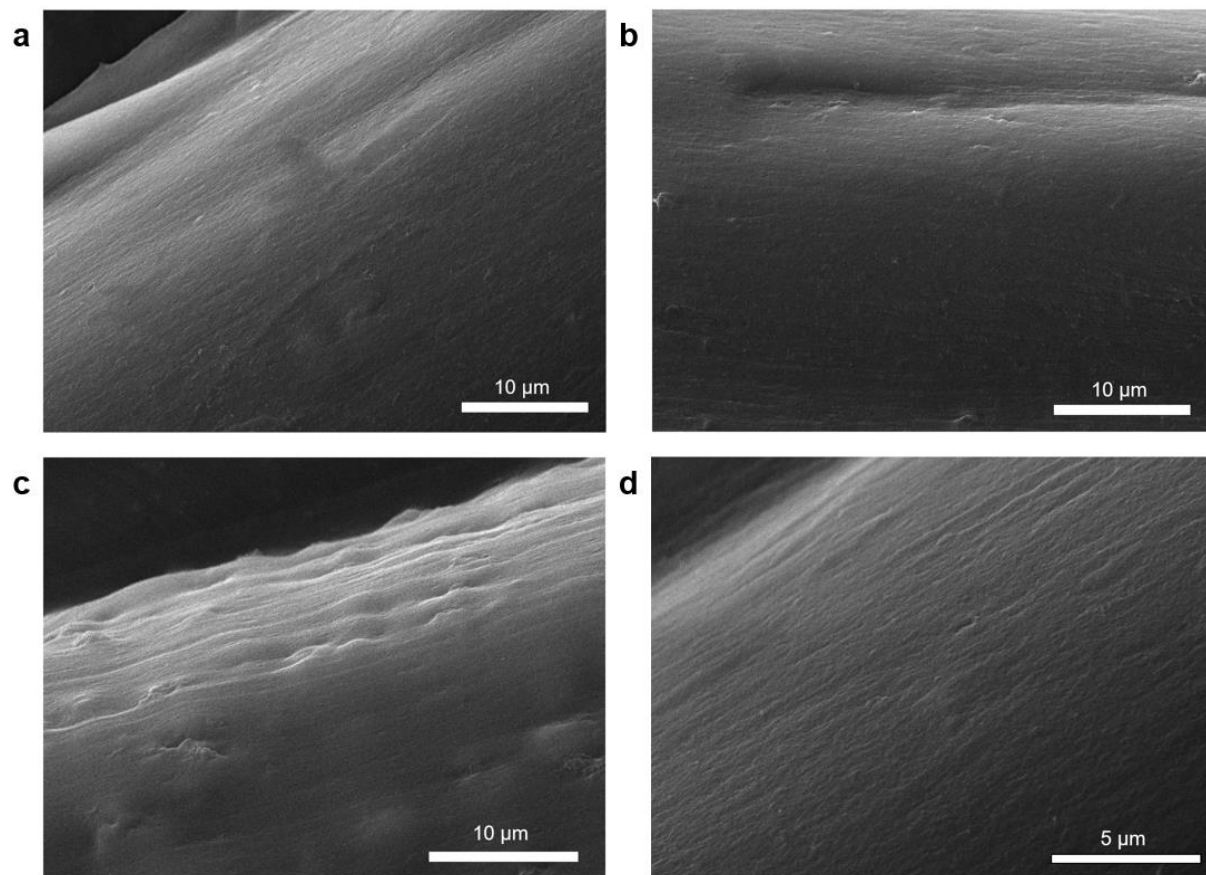

**Supplementary Fig. 24 | SEM images of macroscopic soft scaffold of DAA.** Scanning electron microscopy images of an air-dried macroscopic soft scaffold of **a** DALPhe, **b** DALVal, **c** DALAla and **d** DADphe (5.0 wt.%).



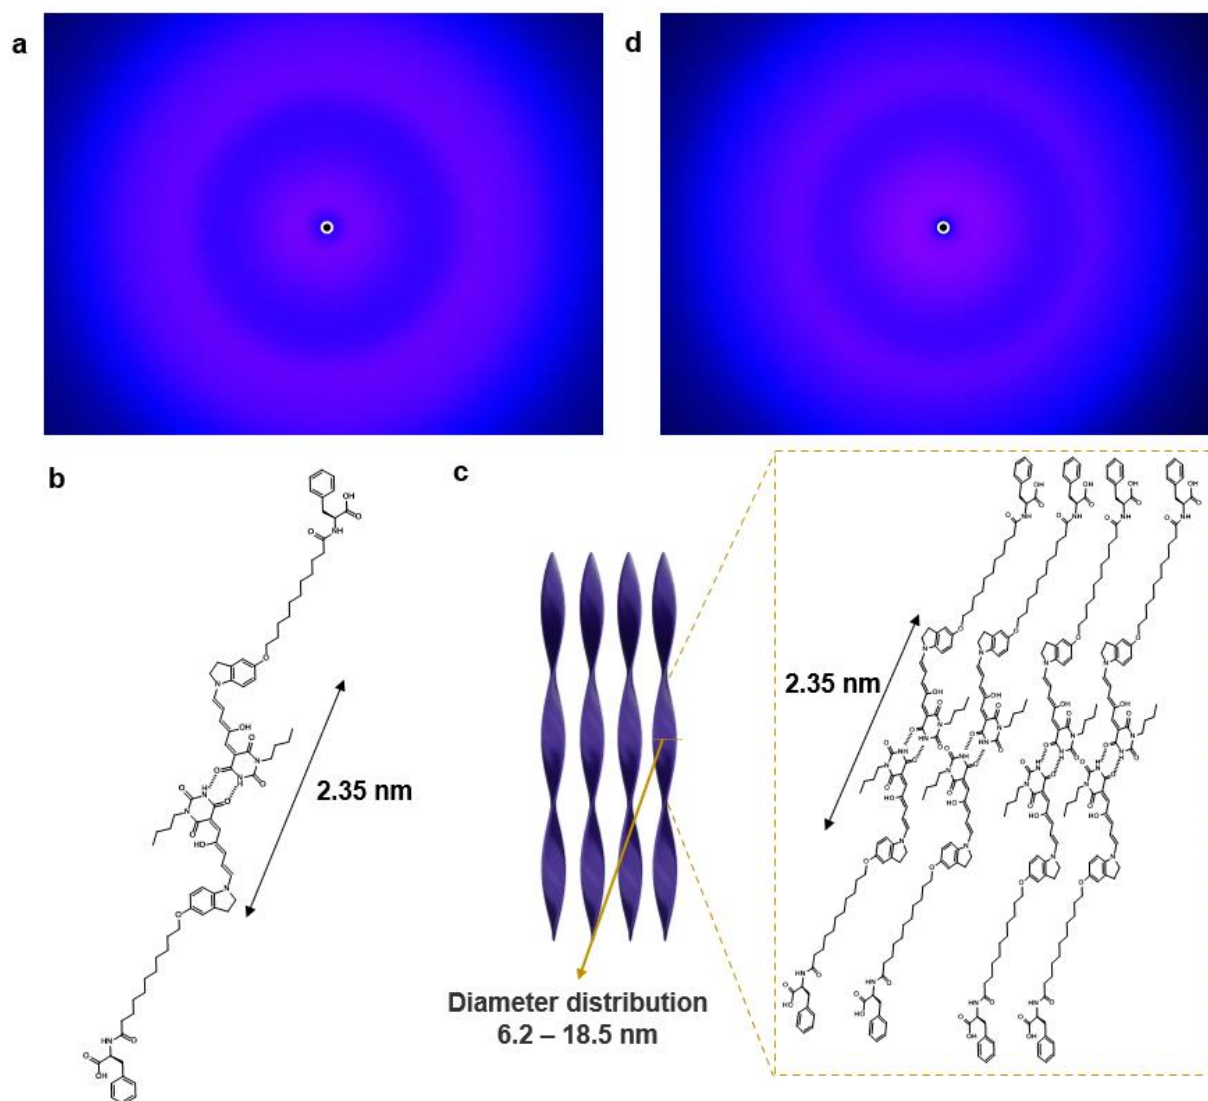

**Supplementary Fig. 25 | WAXD image of a macroscopic soft scaffold of  $\text{DALPhe}$  and schematic illustration of supramolecular packing.** **a** 2D-WAXD image of a macroscopic soft scaffold of  $\text{DALPhe}$  (5.0 wt.%, 68.6 mM) before irradiation **b** Schematic illustration of supramolecular assembled  $\text{DALPhe}$  in a dimeric form leads to diffraction in WAXD of the macroscopic soft scaffold. **c** Schematic illustration of  $\text{DALPhe}$  due to slightly twisted  $\pi$ - $\pi$  packing of the phenyl-groups of phenylalanines within the pre-defined out-of-plane intermolecular distance **d** 2D-WAXD image of a macroscopic soft scaffold of  $\text{DALPhe}$  (5.0 wt.%, 68.6 mM) after red-laser irradiation for 120 min (0.2W, 650 nm).

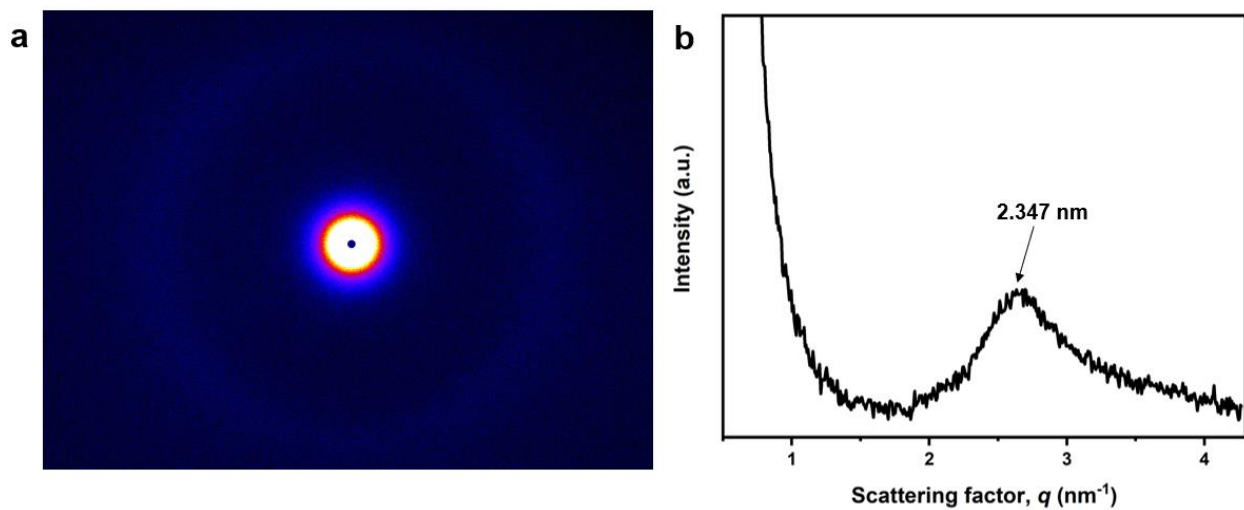

**Supplementary Fig. 26 | SAXS image of a macroscopic soft scaffold of **DALPhe**.** **a** 2D-SAXS image of a macroscopic soft scaffold of **DALPhe** (5.0 wt.%, 68.6 mM) before irradiation. **b** Converted 1D-SAXS profile from 2D-SAXS image of macroscopic soft scaffold of **DALPhe** in **a**.

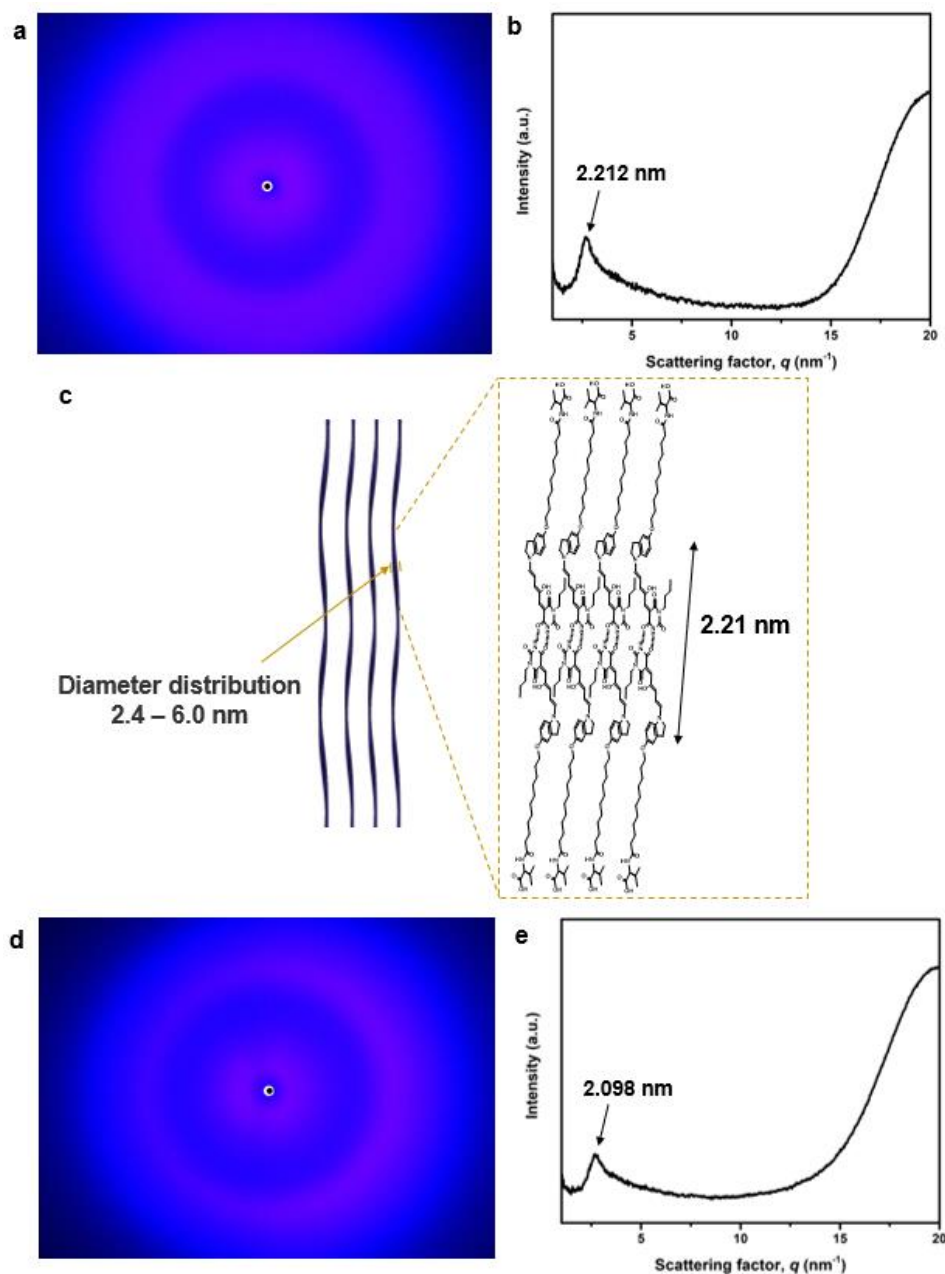

**Supplementary Fig. 27 | WAXD image of a macroscopic soft scaffold of  $\text{DALVal}$  and schematic illustration of supramolecular packing.** **a** 2D-WAXD image of a macroscopic soft scaffold of  $\text{DALVal}$  (5.0 wt.%, 73.4 mM) before irradiation. **b** Converted 1D-WAXD profile from 2D-WAXD image of macroscopic soft scaffold of  $\text{DALVal}$  in **a**. **c** Schematic illustration of supramolecular assembled  $\text{DALVal}$  in a dimeric form leads to diffraction in WAXD of the macroscopic soft scaffold and helical nanofibers diameters. **d** 2D-WAXD image of a macroscopic soft scaffold of  $\text{DALVal}$  (5.0 wt.%, 73.4 mM) after red-laser irradiation for 120 min (0.2W, 650 nm). **e** Converted 1D-WAXD profile from 2D-WAXD image of macroscopic soft scaffold of  $\text{DALVal}$  in **d**.

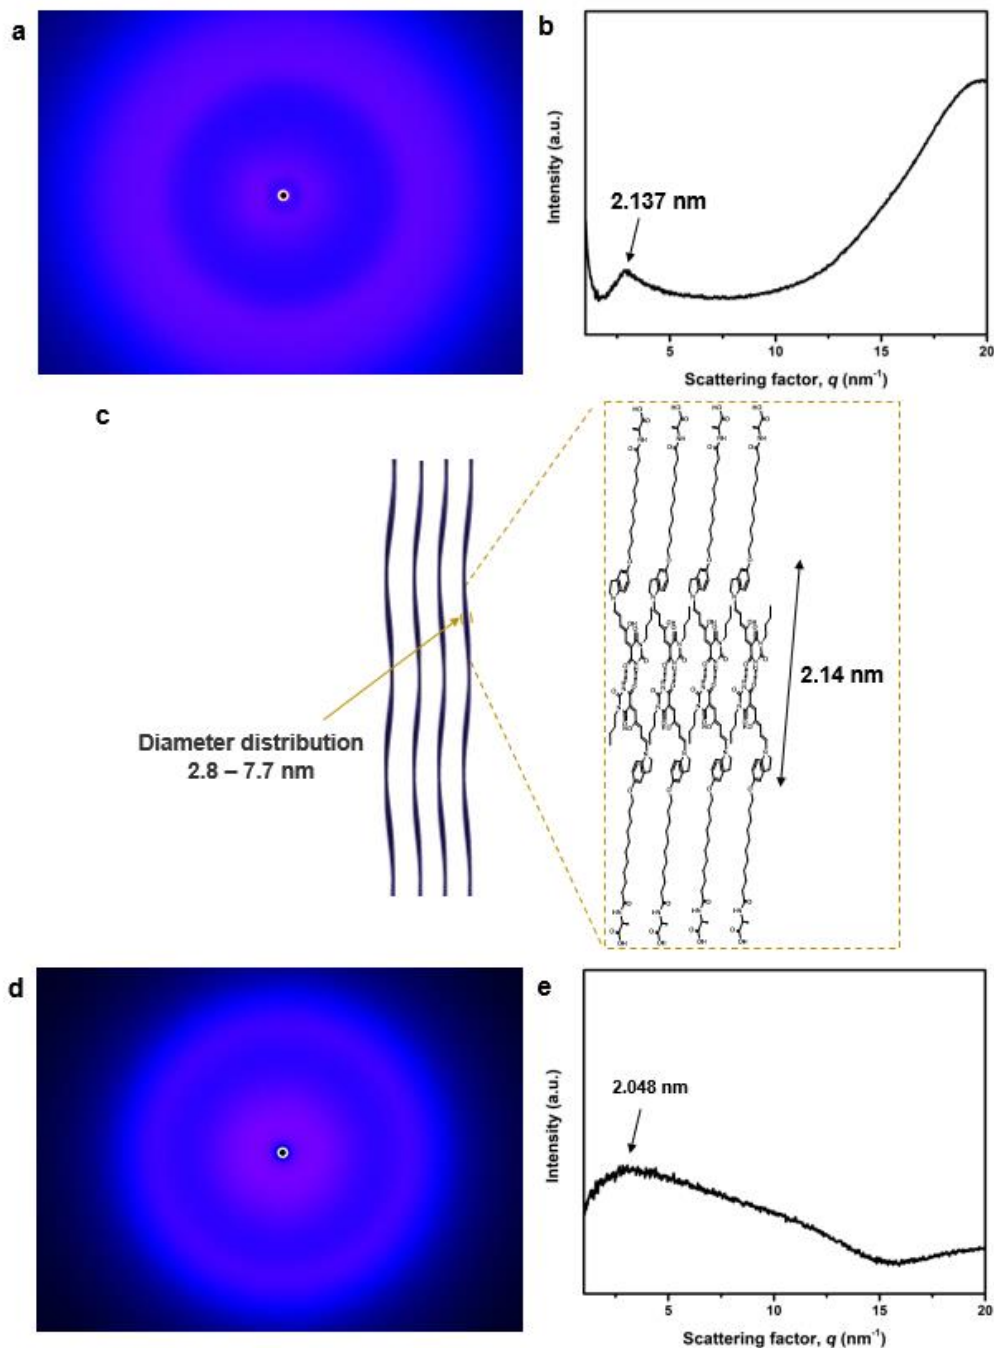

**Supplementary Fig. 28 | WAXD image of a macroscopic soft scaffold of  $\text{DALA1a}$  and schematic illustration of supramolecular packing.** **a** 2D-WAXD image of a macroscopic soft scaffold of  $\text{DALA1a}$  (5.0 wt.%, 76.6 mM) before irradiation. **b** Converted 1D-WAXD profile from 2D-WAXD image of macroscopic soft scaffold of  $\text{DALA1a}$  in **a**. **c** Schematic illustration of supramolecular assembled  $\text{DALA1a}$  in a dimeric form leads to diffraction in WAXD of the macroscopic soft scaffold and helical nanofibres diameters. **d** 2D-WAXD image of a macroscopic soft scaffold of  $\text{DALA1a}$  (5.0 wt.%, 76.6 mM) after red-laser irradiation. **e** Converted 1D-WAXD profile from 2D-WAXD image of macroscopic soft scaffold of  $\text{DALA1a}$  in **d**.

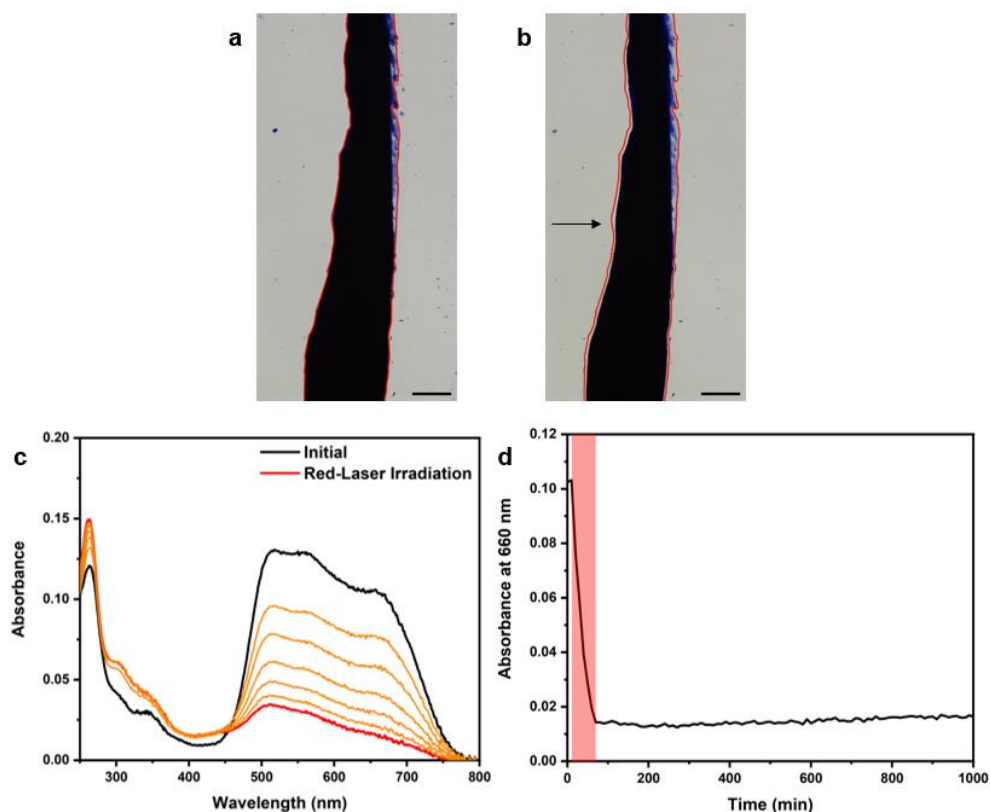

**Supplementary Fig. 29 | Photoirradiation of a macroscopic soft scaffold of DALPhe and photoisomerisation of DALPhe in aqueous solution with red-laser.** **a** Snapshot of a macroscopic soft scaffold of DALPhe (5.0 wt.%, 68.6 mM) before and **b** after 60 min white-light irradiation. (Black arrow indicates the irradiation position) Scale bar 200 μm for all panels. **c** UV-vis absorption spectra of DALPhe in aqueous solution (50 μM) before irradiation (black-line), upon red-laser irradiation over 60 min (orange-line) and after red-laser irradiation for 60 min (red-line). **d** Time-course of the red-laser irradiation of an aqueous solution of DALPhe, monitored at 660 nm (black-line). Photoirradiation of UV-vis sample was carried out at 20 °C using a red-laser (650 nm, 0.2 W) positioned at a distance of 1.0 cm from the sample.

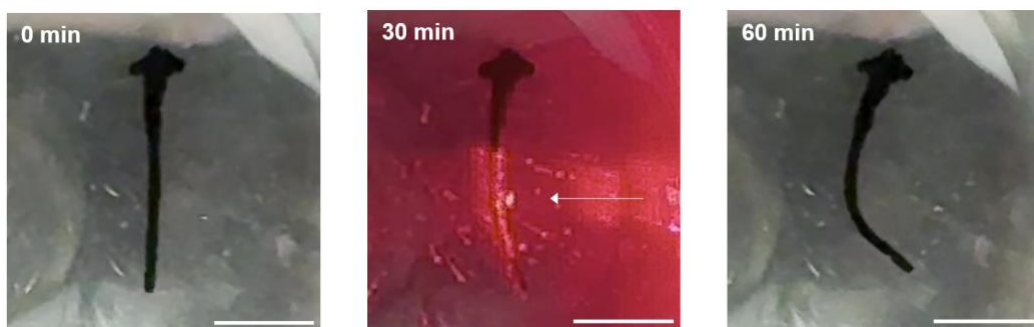

**Supplementary Fig. 30 | Photoactuation of a macroscopic soft scaffold of DADPhe in aqueous solution.** Snapshots of macroscopic soft scaffold of DADPhe (3.0 wt.%, 41.2 mM) in CaCl<sub>2</sub> solution (150 mM) before and after irradiated over 60 min with 650 nm light source from right side. White arrows indicate the irradiation direction and scale bars for all panels: 0.5 cm.

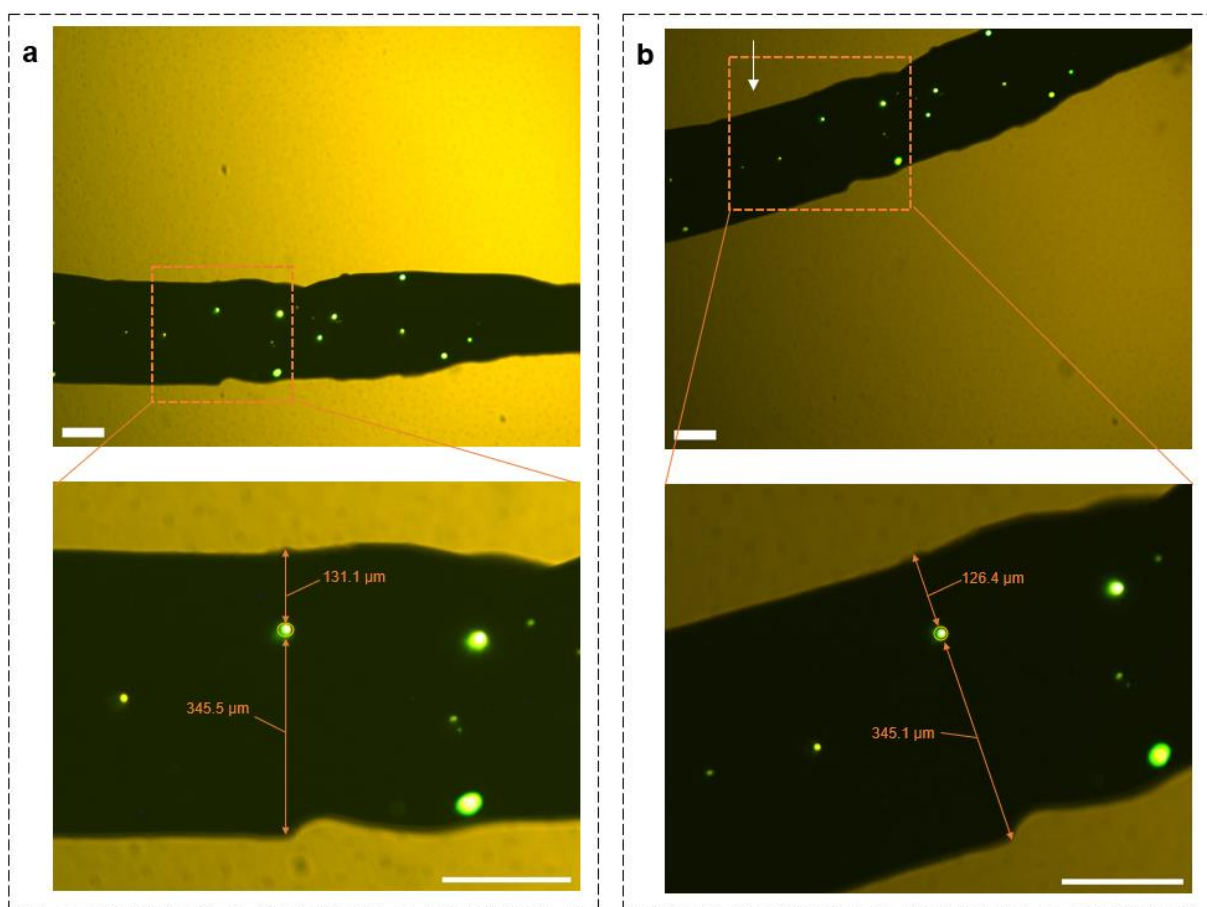

**Supplementary Fig. 31 | Photoactuation of microbeads encapsulated macroscopic soft scaffold of DALPhe in aqueous solution.** **a** Snapshots of a microbeads encapsulated (FluoSpheres™ Polystyrene Microspheres, Invitrogen™) macroscopic soft scaffold of DALPhe (3.0 wt.%, 41.2 mM) in CaCl<sub>2</sub> (150 mM) before irradiation and enlarged selected area. **b** After red laser irradiation to the macroscopic soft scaffold for 70 s and enlarged selected area. Direction of photoirradiation is indicated by the white arrow. Scale bar is 200 μm for all panels.



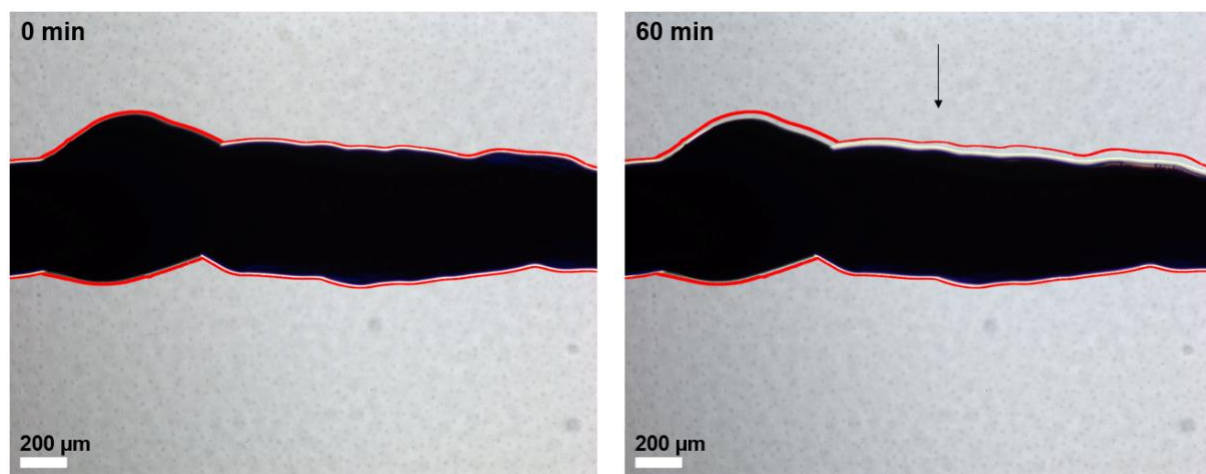

**Supplementary Fig. 32 | Photoirradiation of a macroscopic soft scaffold of  $\text{DALPhe}$  in  $n$ -dodecane solution.** Snapshots of macroscopic soft scaffold of  $\text{DALPhe}$  (3.0 wt.%) immersed in  $n$ -dodecane solution. The macroscopic soft scaffold of  $\text{DALPhe}$  was applied red laser irradiation over 60 min. Direction of the irradiation is indicated by the black arrow. Scale bar is 200  $\mu\text{m}$  for all panels.

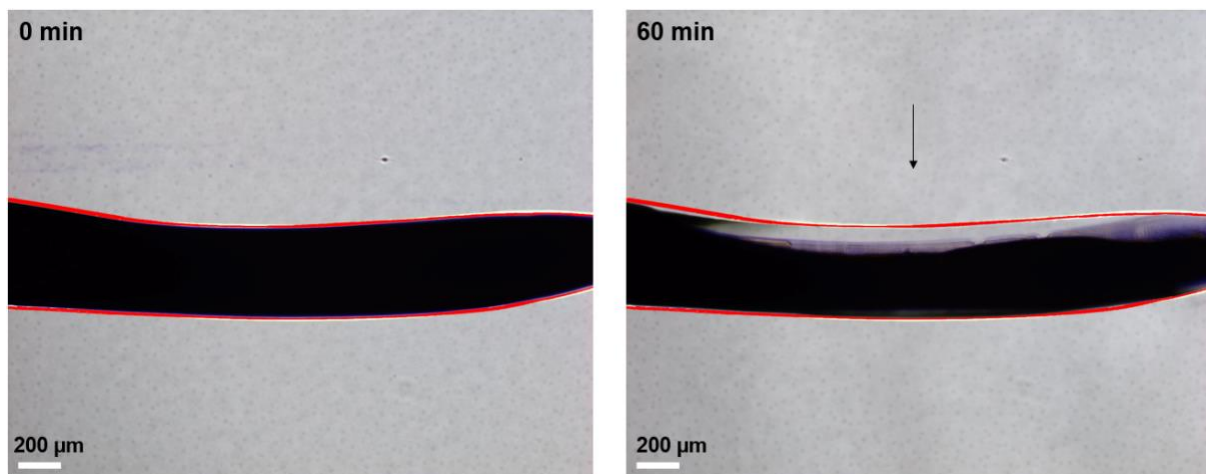

**Supplementary Fig. 33 | Photoirradiation of a macroscopic soft scaffold of  $\text{DALVal}$  in  $n$ -dodecane solution.** Snapshots of macroscopic soft scaffold of  $\text{DALVal}$  (3.0 wt.%) immersed in  $n$ -dodecane solution. The macroscopic soft scaffold of  $\text{DALVal}$  was applied red laser irradiation over 60 min. Direction of the irradiation is indicated by the black arrow. Scale bar is 200  $\mu\text{m}$  for all panels.

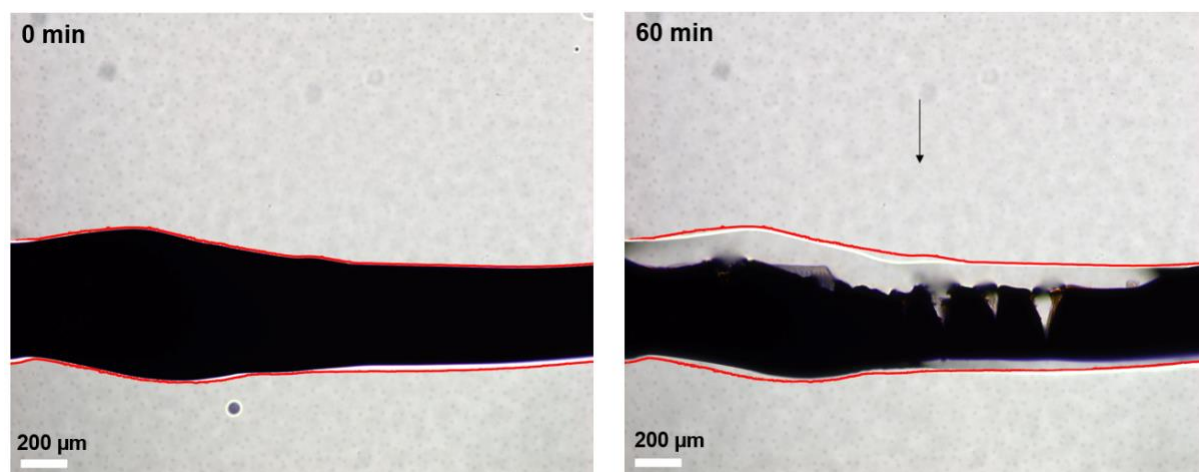

**Supplementary Fig. 34 | Photoirradiation of a macroscopic soft scaffold of DA<sub>LAla</sub> in *n*-dodecane solution.** Snapshots of macroscopic soft scaffold of DA<sub>LAla</sub> (3.0 wt.%) immersed in *n*-dodecane solution. The macroscopic soft scaffold of DA<sub>LAla</sub> was applied red laser irradiation over 60 min. Direction of the irradiation is indicated by the black arrow. Scale bar is 200  $\mu\text{m}$  for all panels.

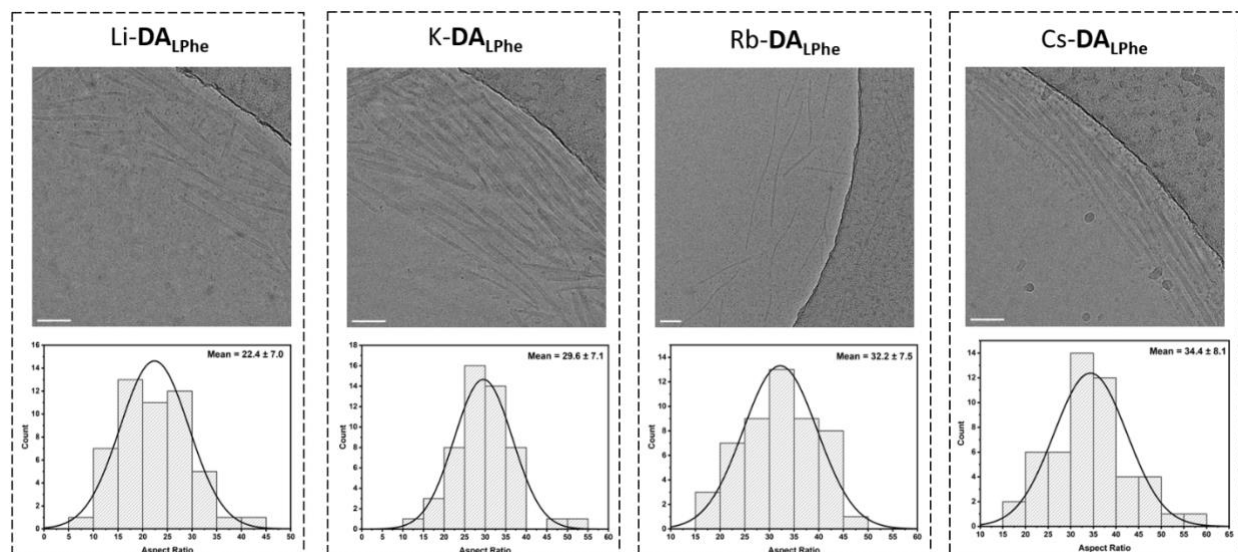

**Supplementary Fig. 35 | Cryo-TEM images of M-DA<sub>LPh</sub> in aqueous solution and corresponding aspect-ratio histogram profile.** Representative of cryo-TEM images and histogram of aspect-ratio distribution of M-DA<sub>LPh</sub> (1.0 wt.%, 13.7 mM). Scale bar is 50 nm for all panels.



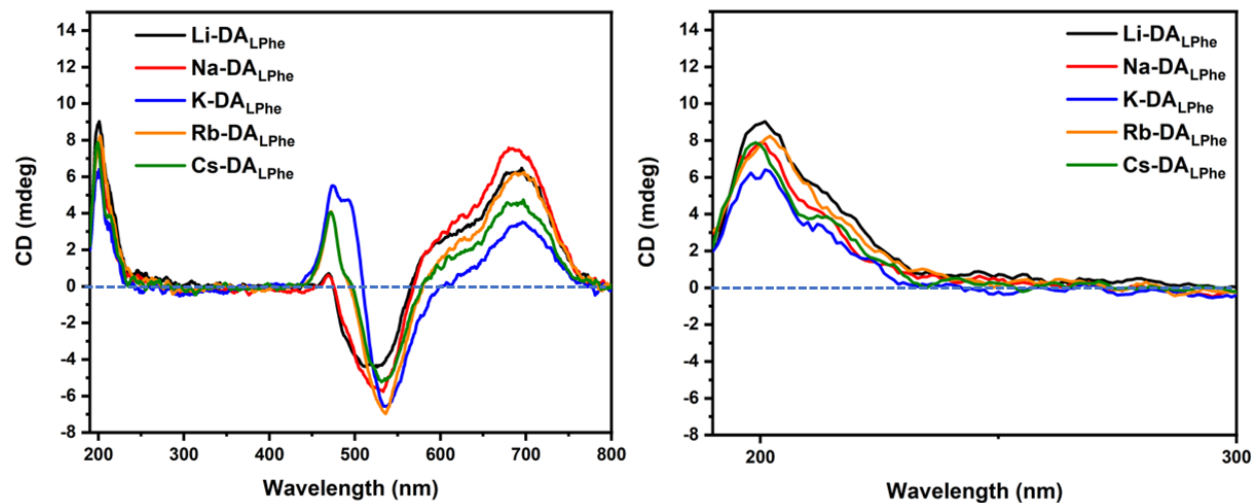

**Supplementary Fig. 36 | Circular dichroism of M-DALPhe in aqueous solution.** Circular dichroism spectra of the aqueous solution of M-DALPhe (50  $\mu$ M) and enlarged circular dichroism spectra at 190 – 250 nm wavelength.

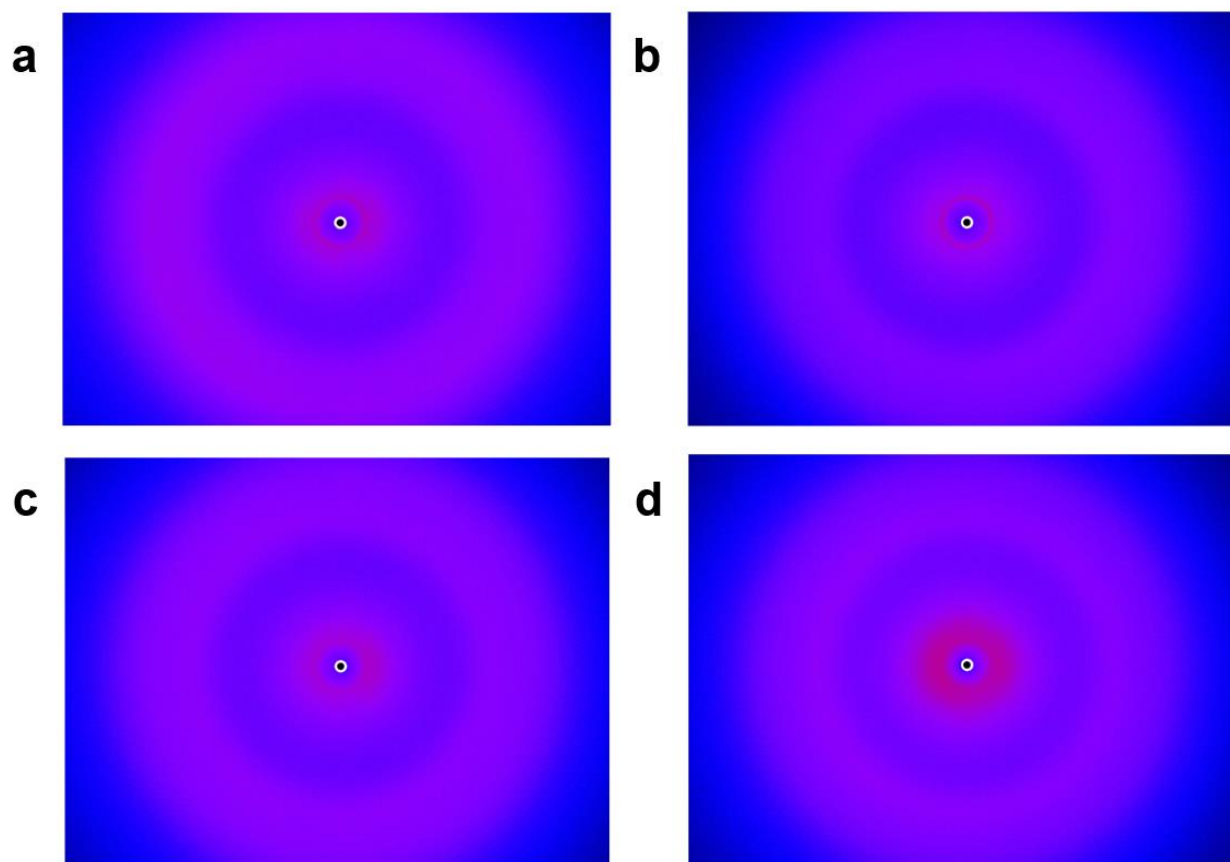

**Supplementary Fig. 37 | 2D-WAXD image of a macroscopic soft scaffold of M-DA<sub>LPhe</sub>.** 2D-WAXD images of a macroscopic soft scaffold of **a** Li-DA<sub>Phe</sub>, **b** K-DA<sub>Phe</sub>, **c** Rb-DA<sub>Phe</sub>, and **d** Cs-DA<sub>Phe</sub> (5.0 wt.%, 73.4 mM) before irradiation.

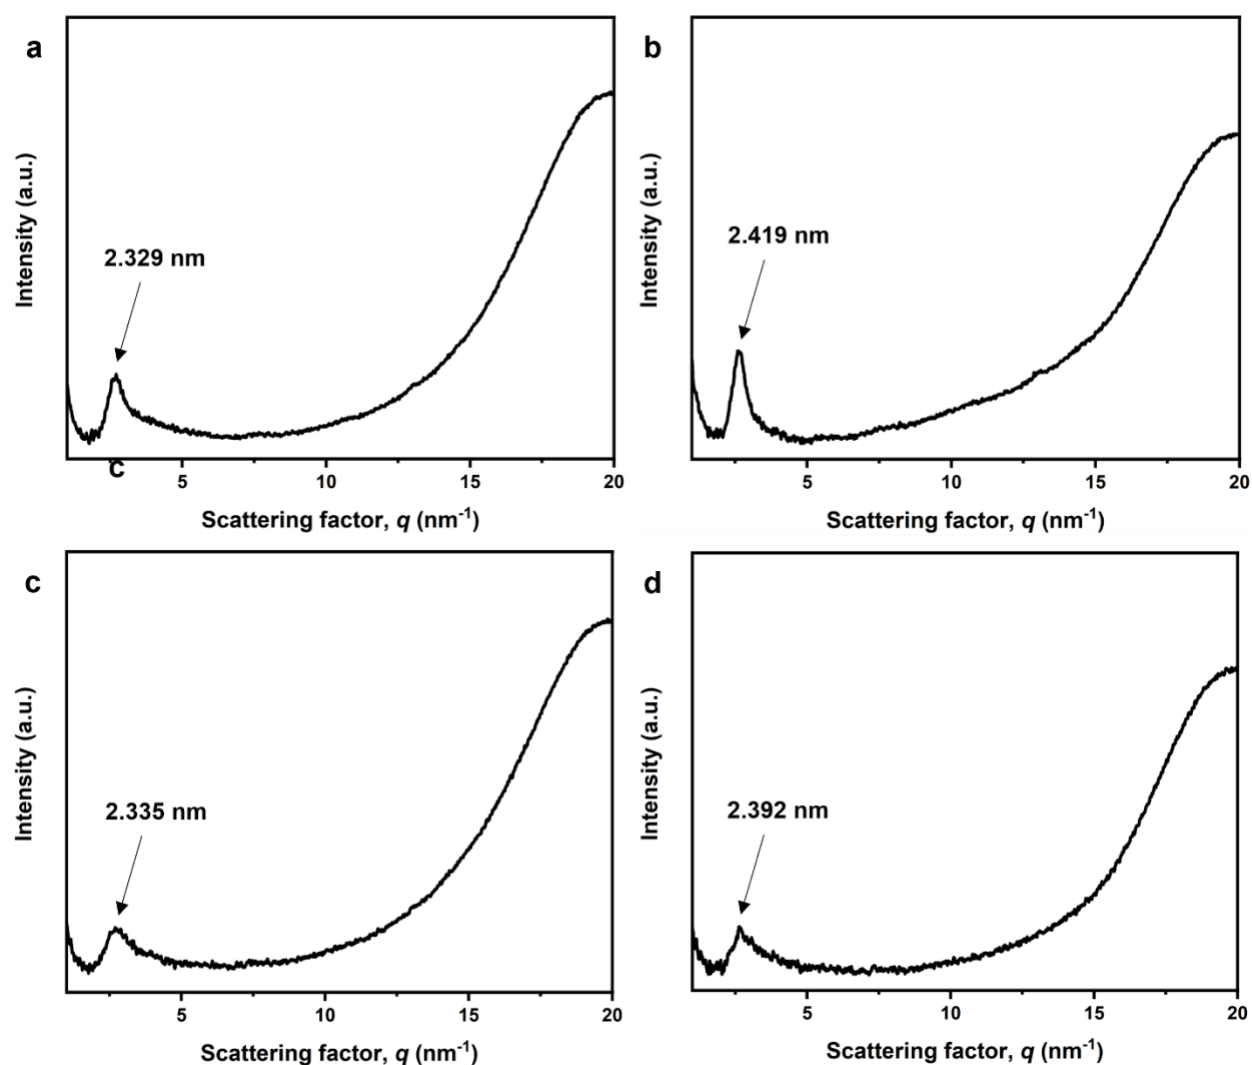

**Supplementary Fig. 38 | 1D-WAXD profile of a macroscopic soft scaffold of M-DALPhe.** Corresponding converted 1D-WAXD profiles of a macroscopic soft scaffold of **a** Li-DAPhe, **b** K-DAPhe, **c** Rb-DAPhe, and **d** Cs-DAPhe (5.0 wt.%, 73.4 mM) before irradiation.

| M-DA <sub>L</sub> Phe  | Length (nm)    | Width (nm)  |
|------------------------|----------------|-------------|
| Li-DA <sub>L</sub> Phe | 147.10 ± 41.61 | 6.80 ± 1.57 |
| Na-DA <sub>L</sub> Phe | 147.47 ± 37.57 | 6.21 ± 1.30 |
| K-DA <sub>L</sub> Phe  | 206.96 ± 51.22 | 7.16 ± 1.63 |
| Rb-DA <sub>L</sub> Phe | 196.77 ± 60.65 | 6.04 ± 1.07 |
| Cs-DA <sub>L</sub> Phe | 222.15 ± 55.39 | 6.55 ± 0.95 |

**Supplementary Table 1 | Length and width distribution of M-DA<sub>L</sub>Phe measured from cryo-TEM images.** The length and width distribution from corresponding cryo-TEM images with 50 numbers of nanoribbons of M-DA<sub>L</sub>Phe (1.0 wt.% 13.7 mM).

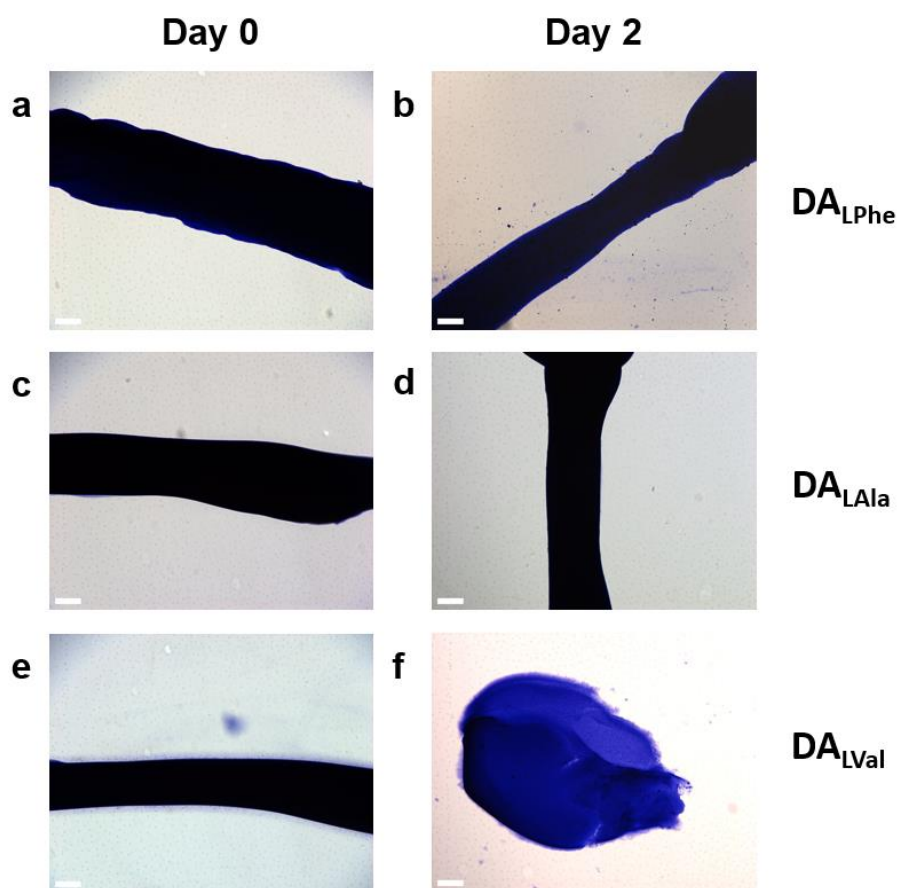

**Supplementary Fig. 39 | Stability of macroscopic soft scaffolds of DA<sub>A</sub> in 10% FBS medium over 2 days incubation.** Snapshots of macroscopic soft scaffolds of DA<sub>L</sub>Phe (3.0 wt.%), DA<sub>L</sub>Val (3.0 wt.%) and DA<sub>L</sub>Ala (3.0 wt.%) were immersed in 10% FBS medium over 2 days of incubation at 37°C and 5% CO<sub>2</sub>. Scale bar is 200 μm for all panels.

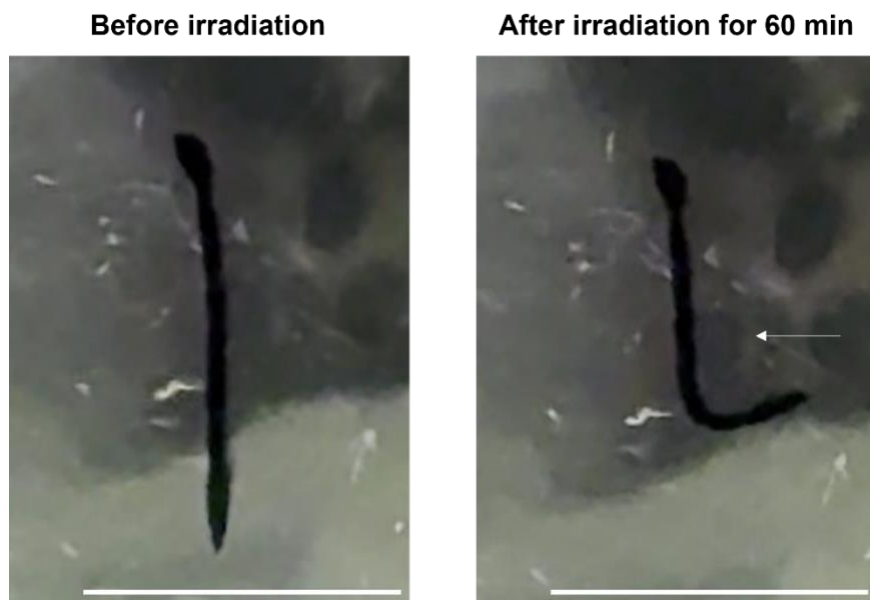

**Supplementary Fig. 40 | Photoactuation of macroscopic soft scaffolds of  $\text{DA}_{\text{LAla}}$  after 10% FBS medium incubation over 2 days.** Snapshots of before and after 60 min red-laser irradiation (0.2 W, 650 nm) of macroscopic soft scaffold of  $\text{DA}_{\text{LAla}}$  (3.0 wt.%) after 10% FBS medium incubation over 2 days. White arrow indicates photoirradiation position. Scale bar is 0.5 cm for all panels.

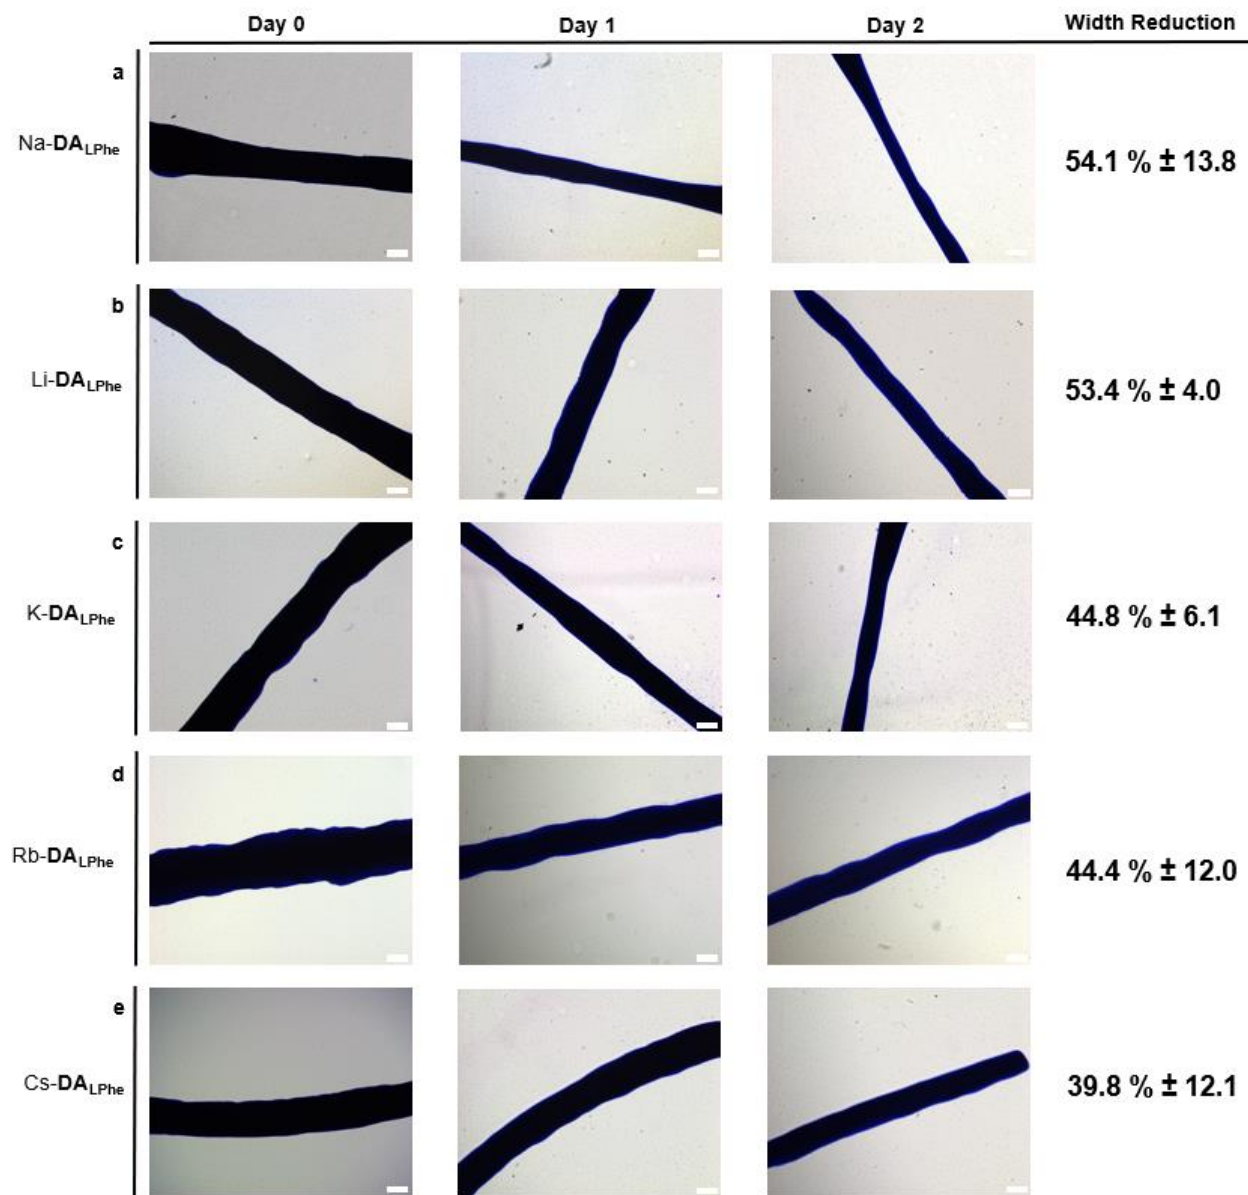

**Supplementary Fig. 41 | Stability study of macroscopic soft scaffolds of M-DA<sub>L</sub>Phe 20% FBS medium over 2 days incubation.** Snapshots of representative macroscopic soft scaffold of **a** Na-DA<sub>L</sub>Phe **b** Li-DA<sub>L</sub>Phe **c** K-DA<sub>L</sub>Phe **d** Rb-DA<sub>L</sub>Phe **and e** Cs-DA<sub>L</sub>Phe (3.0 wt.%) immersed in 20% FBS medium over 2 days incubation. The corresponding width reduction percentage were obtained by averaging five macroscopic soft scaffold's widths. Scale bar is 200  $\mu$ m for all panels.

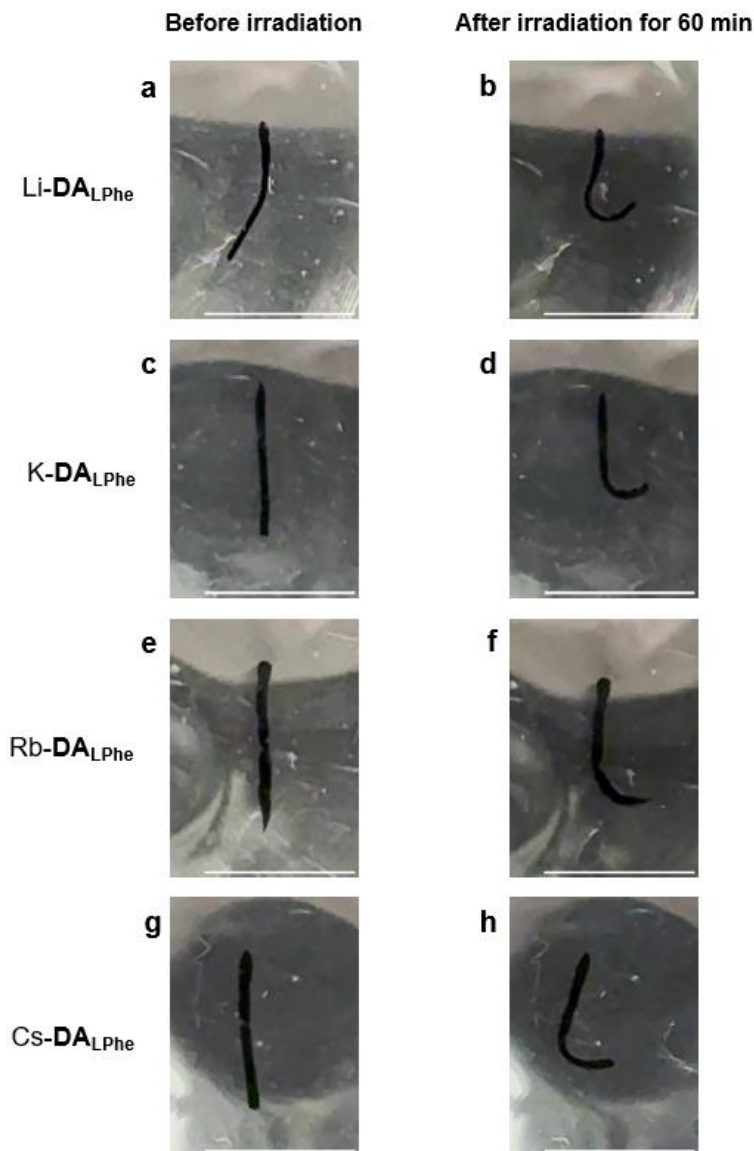

**Supplementary Fig. 42 | Photoactuation of macroscopic soft scaffolds of M-**DA**<sub>L</sub>Phe after 10% FBS medium incubation over 2 days.** The 10% FBS medium containing macroscopic soft scaffolds M-**DA**<sub>L</sub>Phe were exchanged to CaCl<sub>2</sub> solution before performing actuation experiment. Snapshots of before irradiation of macroscopic soft scaffold of **a** Li-**DA**<sub>L</sub>Phe **c** K-**DA**<sub>L</sub>Phe **e** Rb-**DA**<sub>L</sub>Phe and **g** Cs-**DA**<sub>L</sub>Phe (3.0 wt.%) after 10% FBS medium incubation over 2 days. Snapshots of macroscopic soft scaffold of **b** Li-**DA**<sub>L</sub>Phe **d** K-**DA**<sub>L</sub>Phe **f** Rb-**DA**<sub>L</sub>Phe and **h** Cs-**DA**<sub>L</sub>Phe (3.0 wt.%) after 60 min red-laser irradiation (0.2 W, 650 nm). Scale bar is 0.5 cm for all panels.

| M-DA <sub>L</sub> Phe  | Actuation Speed (°/min) |
|------------------------|-------------------------|
| Li-DA <sub>L</sub> Phe | 1.62                    |
| Na-DA <sub>L</sub> Phe | 1.73                    |
| K-DA <sub>L</sub> Phe  | 1.66                    |
| Rb-DA <sub>L</sub> Phe | 1.53                    |
| Cs-DA <sub>L</sub> Phe | 1.53                    |

**Supplementary Table 2 | Photo-induced actuation speed of macroscopic soft scaffolds of M-DA<sub>L</sub>Phe after 2 days of 10% FBS medium incubation.** The macroscopic soft scaffolds of M-DA<sub>L</sub>Phe (3.0 wt.) were incubated in 10% FBS medium for 2 days. The 10% FBS medium containing macroscopic soft scaffolds M-DA<sub>L</sub>Phe were exchanged to CaCl<sub>2</sub> solution before performing actuation experiment. All the macroscopic soft scaffolds were irradiated with red-laser for 60 min (0.2W, 650 nm).

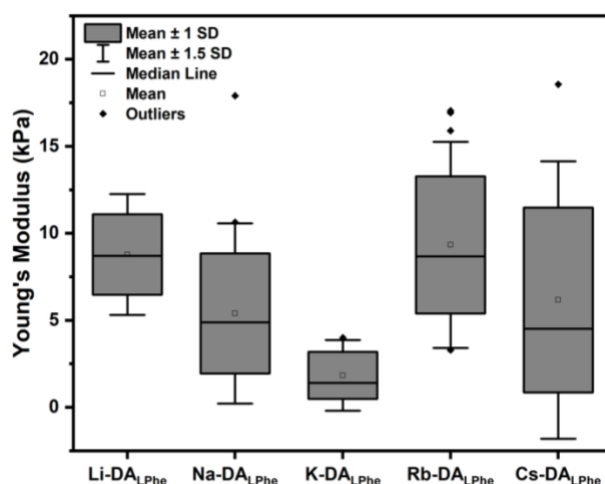

**Supplementary Fig. 43 | Probing of Young's modulus of macroscopic soft scaffolds of M-DA<sub>L</sub>Phe through AFM nanoindentation.** Young's modulus values of macroscopic soft scaffolds of M-DA<sub>L</sub>Phe (3.0 wt.%) without photoirradiation.



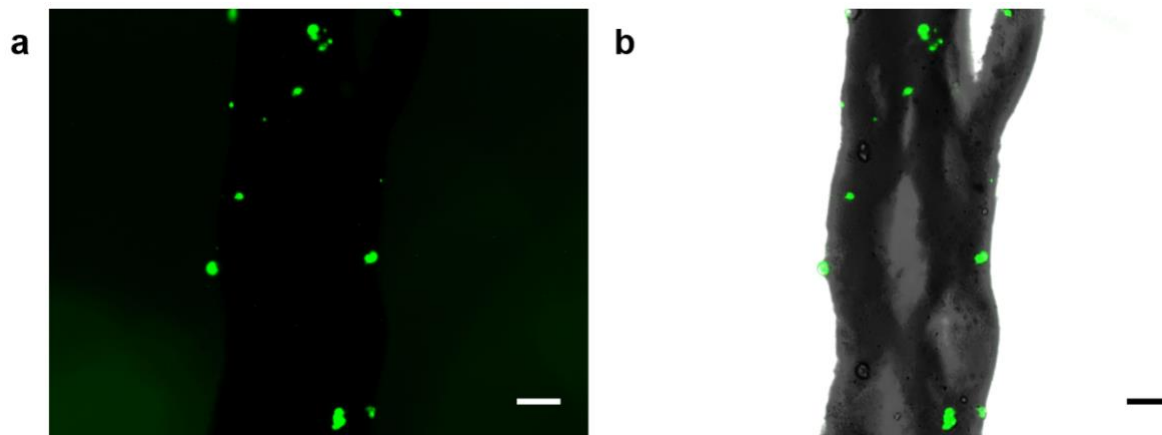

**Supplementary Fig. 44 | Cell cultured macroscopic soft scaffold of Na-DALPhe in 10% FBS medium for 1 day.** Snapshot of **a** Calcein AM live cell staining and **b** merged with bright field of hMSCs cultured with macroscopic soft scaffold of DALPhe (3.0 wt.%) after 1 day of incubation in 10% FBS supplemented medium at 37 °C and 5% CO<sub>2</sub>. Scale bar is 200  $\mu$ m for all panels.

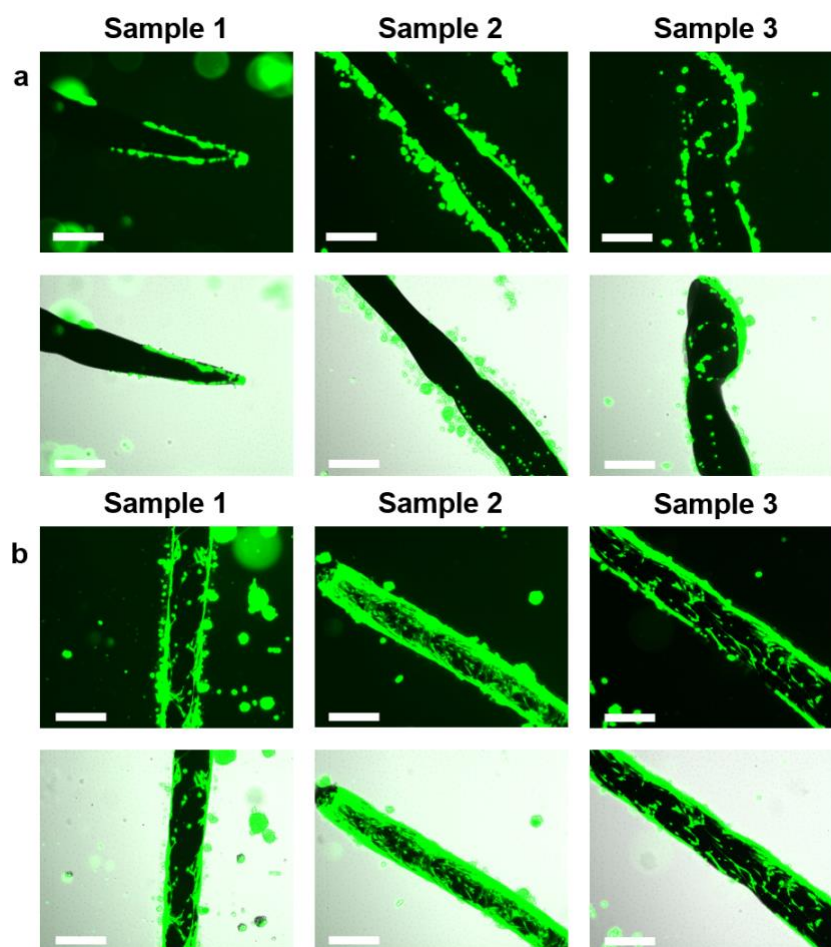

**Supplementary Fig. 45 | Cell cultured macroscopic soft scaffolds of Na-DA<sub>Lala</sub> and Na-DA<sub>Dphe</sub> in 2% FBS medium for 1 day.** Snapshots of Calcein AM live cell staining and merged with bright field of hMSCs cultured with macroscopic soft scaffold of **a** Na-DA<sub>Lala</sub> (3.0 wt.%) and **b** Na-DA<sub>Dphe</sub> (3.0 wt.%) after 1 day of incubation in 2% FBS supplemented medium at 37 °C and 5% CO<sub>2</sub>. Scale bar is 500  $\mu$ m for all panels.

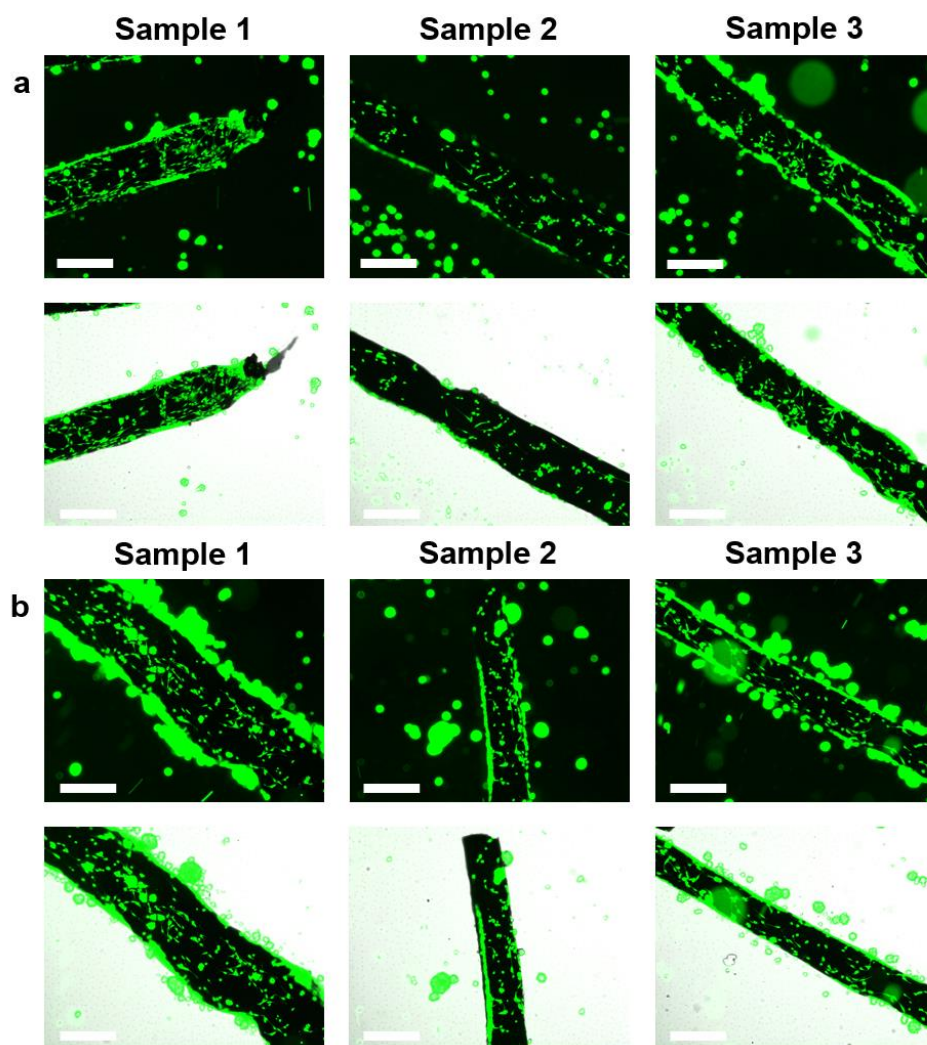

**Supplementary Fig. 46 | Cell cultured macroscopic soft scaffolds of Li-DALPhe and Cs-DALPhe in 2% FBS medium for 1 day.** Snapshots of Calcein AM live cell staining and merged with bright field of hMSCs cultured with macroscopic soft scaffold of **a** Li-DALPhe (3.0 wt.%) and **b** Cs-DALPhe (3.0 wt.%) after 1 day of incubation in 2% FBS supplemented medium at 37 °C and 5% CO<sub>2</sub>. Scale bar is 500  $\mu$ m for all panels.

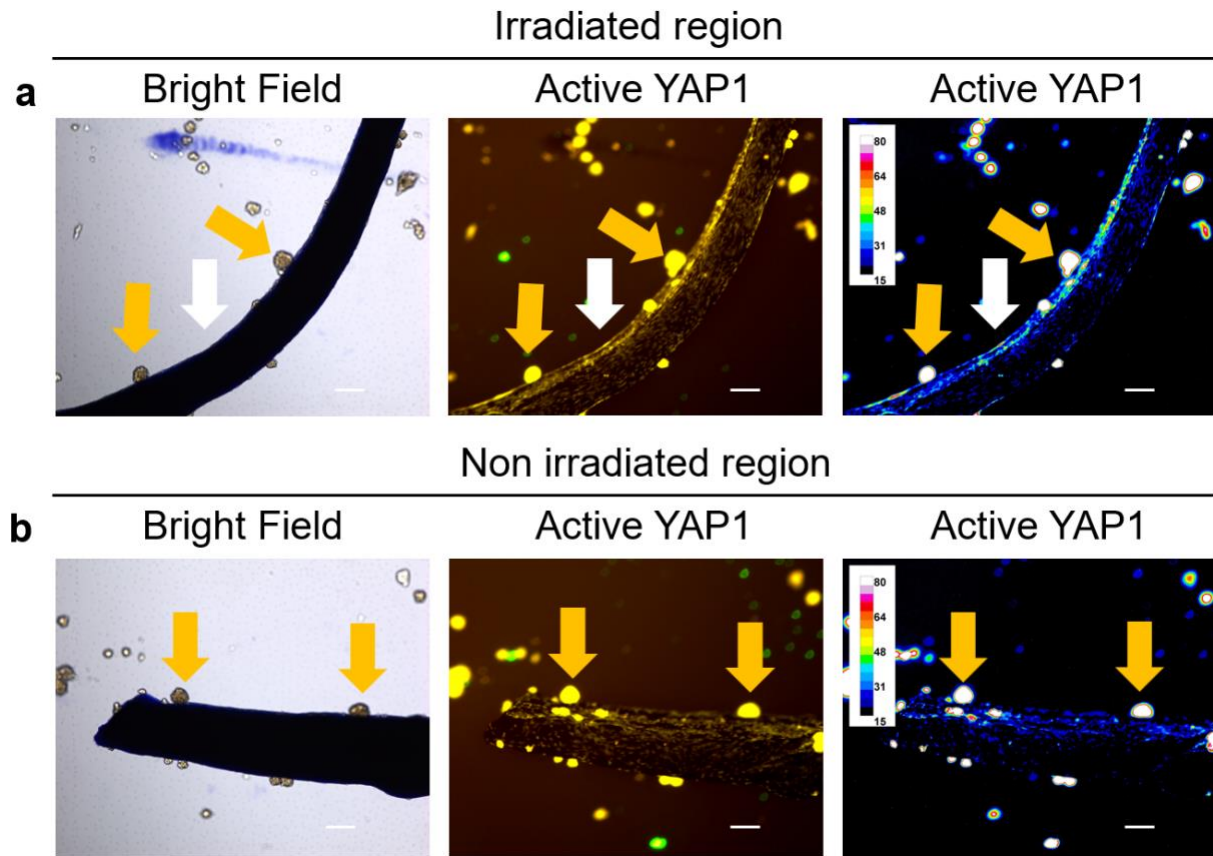

**Supplementary Fig. 47 | Mechano-transduction study of hMSCs using macroscopic soft scaffold of DA<sub>L</sub>Ph<sub>e</sub>.** Lower magnification view (5x) of the mechano-transduction sample (as shown in Fig. 7). White arrow: irradiated region. Blue arrow: examples of cell aggregate attached on the scaffold. Scale bar: 200  $\mu$ m

## 4. Analytical Data

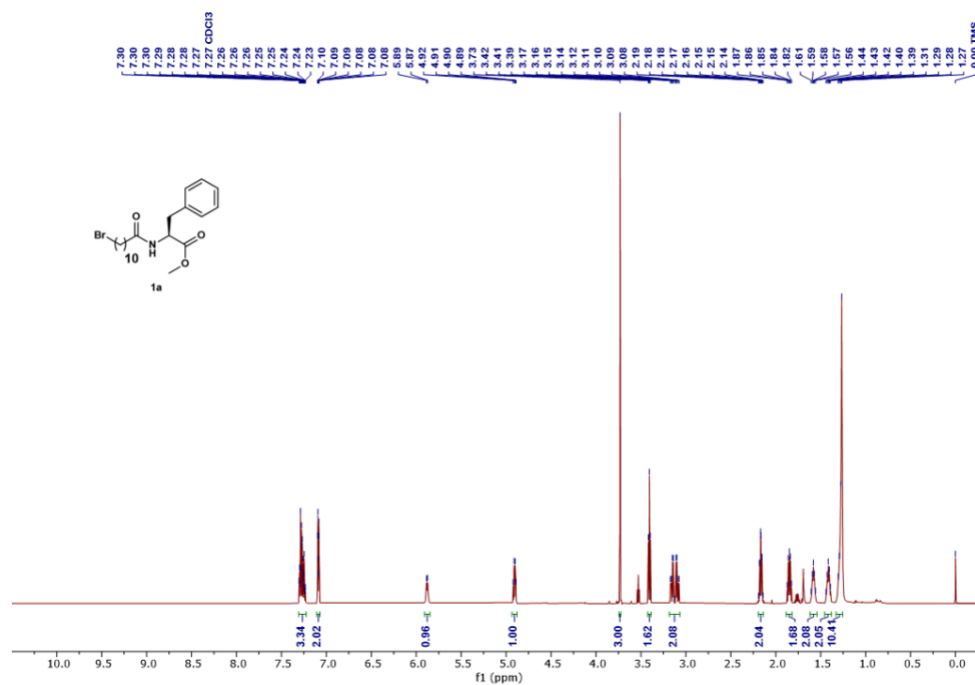

**Supplementary Fig. 48** | <sup>1</sup>H NMR spectrum (600 MHz, 25 °C) of compound **1a** in CDCl<sub>3</sub> with 0.03% v/v TMS

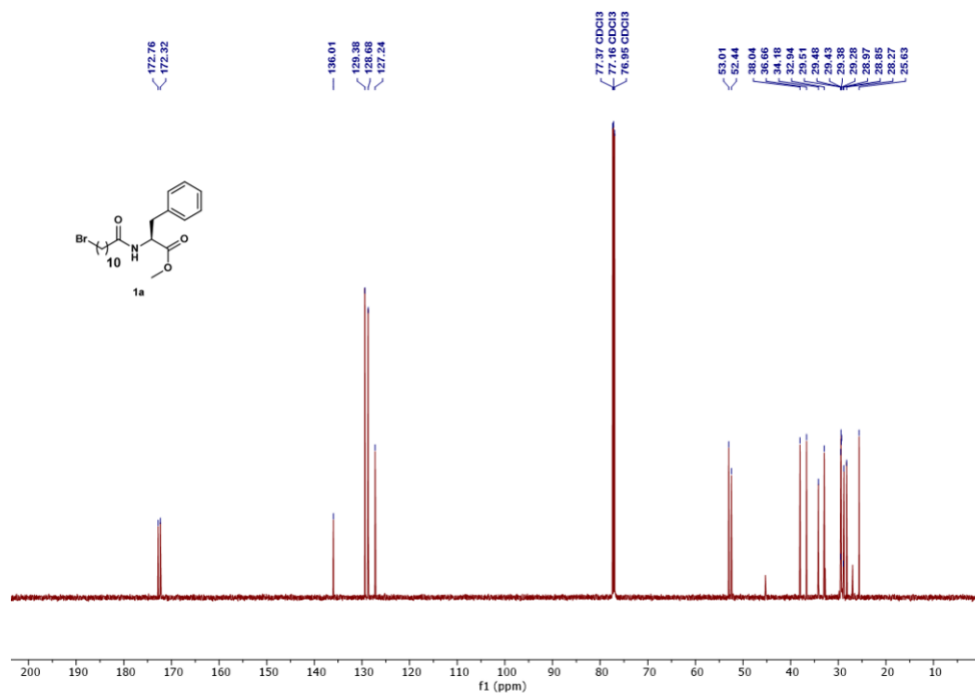

**Supplementary Fig. 49** |  $^{13}\text{C}$  NMR spectrum (151 MHz, 25 °C) of compound **1a** in  $\text{CDCl}_3$  with 0.03% v/v TMS.

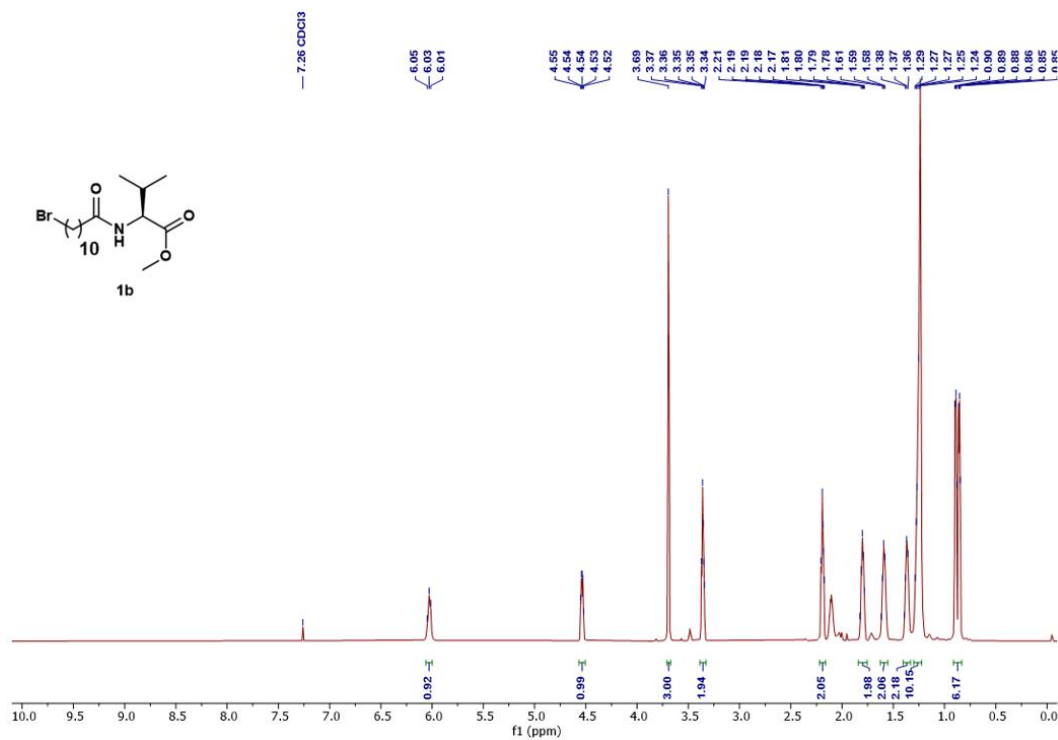

**Supplementary Fig. 50** | <sup>1</sup>H NMR spectrum (600 MHz, 25 °C) of compound **1b** in CDCl<sub>3</sub> with 0.03% v/v TMS

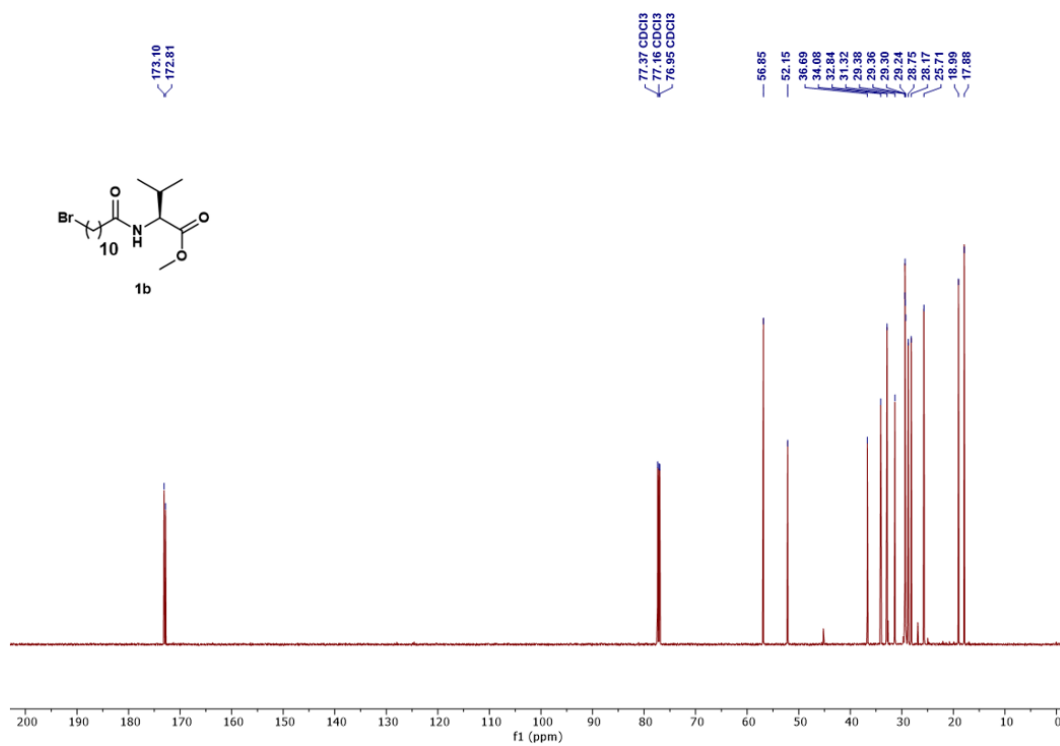

**Supplementary Fig. 51** | <sup>13</sup>C NMR spectrum (151 MHz, 25 °C) of compound **1b** in CDCl<sub>3</sub> with 0.03% v/v TMS.

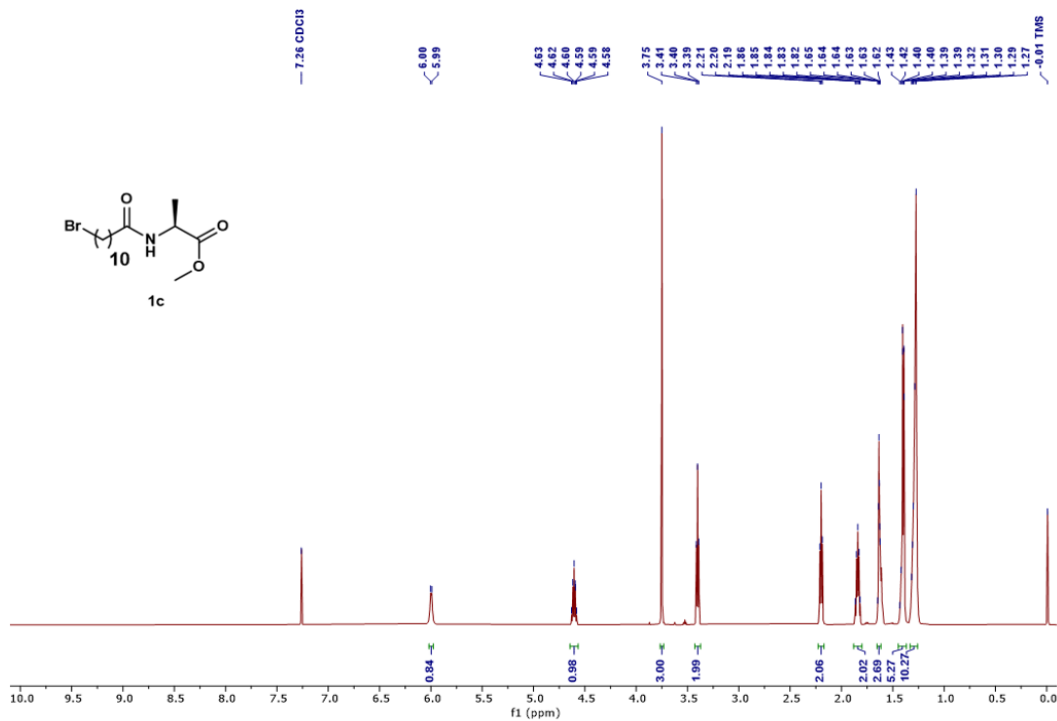

**Supplementary Fig. 52** | <sup>1</sup>H NMR spectrum (600 MHz, 25 °C) of compound **1c** in CDCl<sub>3</sub> with 0.03% v/v TMS

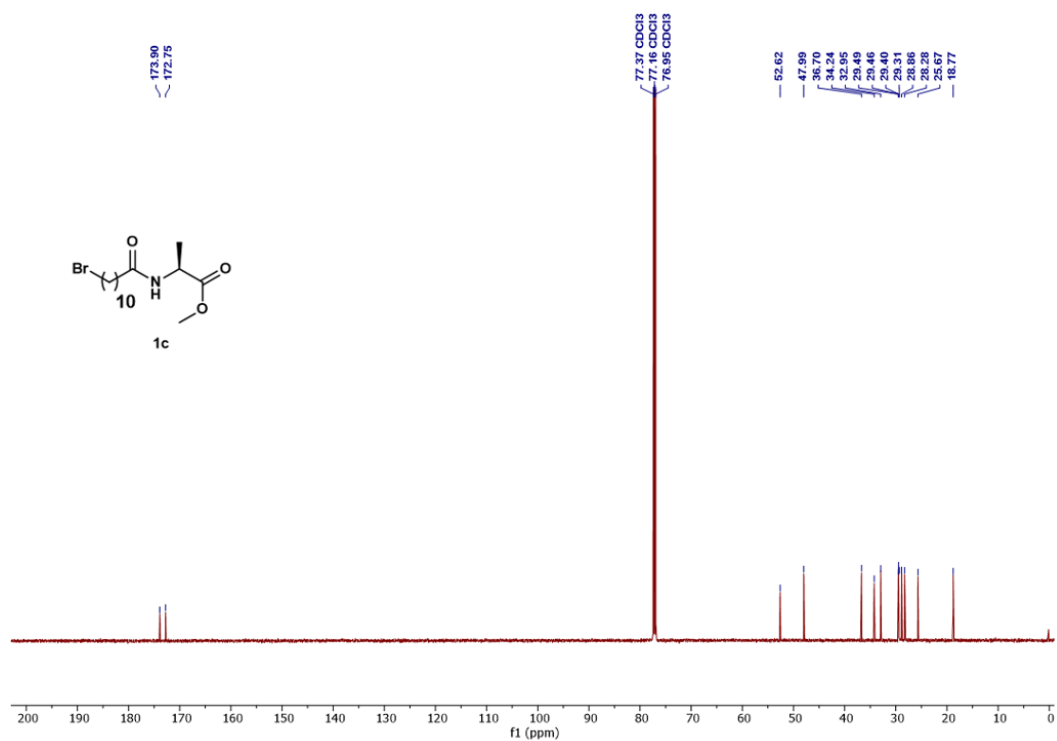

**Supplementary Fig. 53** | <sup>13</sup>C NMR spectrum (151 MHz, 25 °C) of compound **1c** in CDCl<sub>3</sub> with 0.03% v/v TMS.

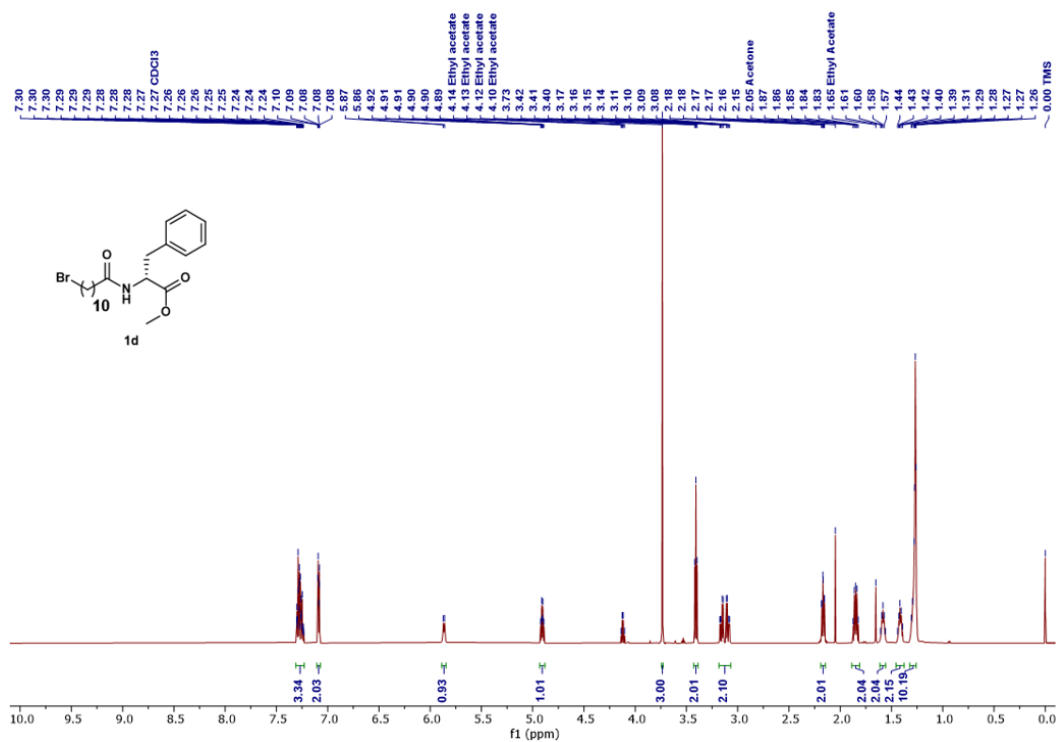

**Supplementary Fig. 54** | <sup>1</sup>H NMR spectrum (600 MHz, 25 °C) of compound **1d** in CDCl<sub>3</sub> with 0.03% v/v TMS

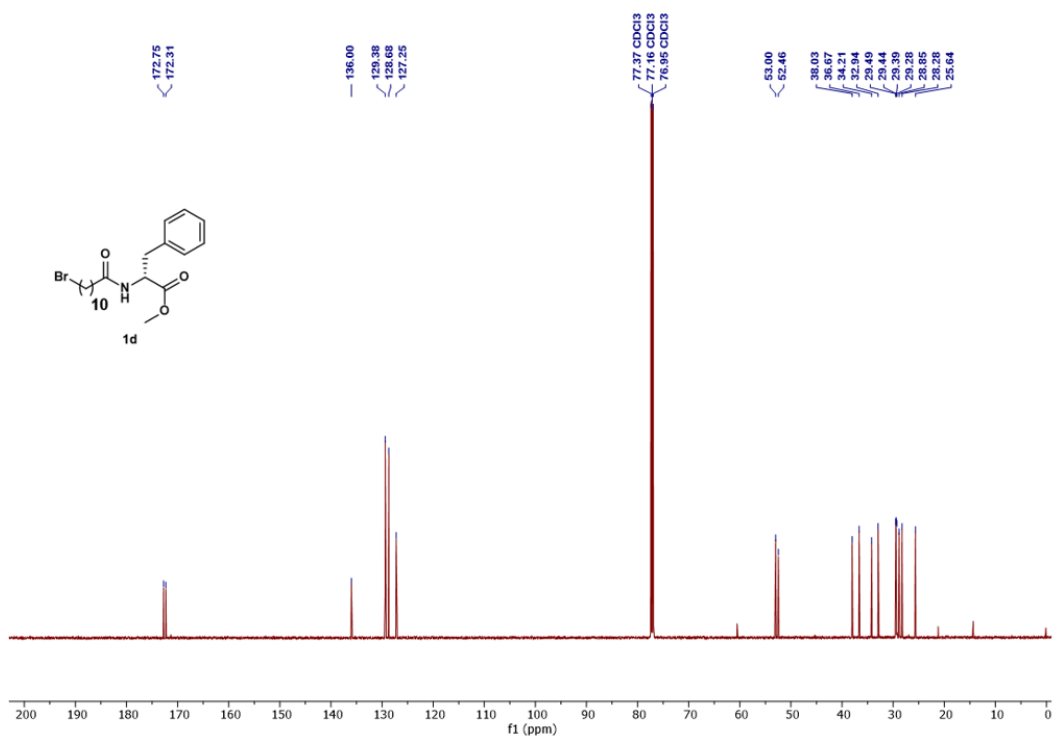

**Supplementary Fig. 55** | <sup>13</sup>C NMR spectrum (151 MHz, 25 °C) of compound **1d** in CDCl<sub>3</sub> with 0.03% v/v TMS.



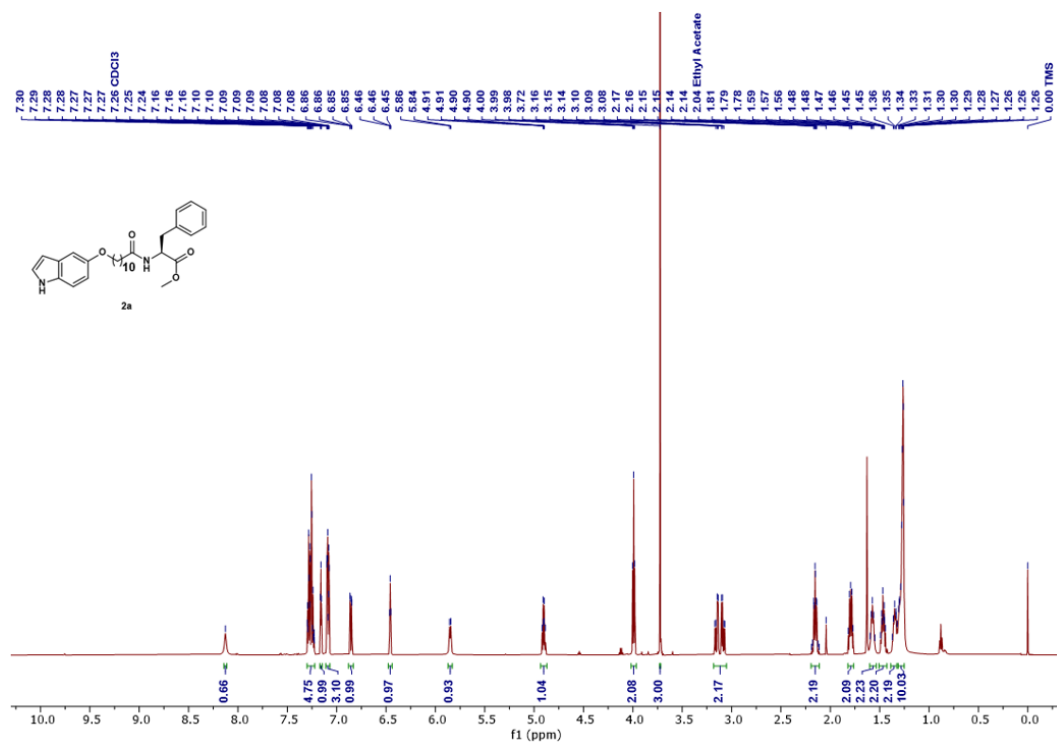

**Supplementary Fig. 56** | <sup>1</sup>H NMR spectrum (600 MHz, 25 °C) of compound 2a in CDCl<sub>3</sub> with 0.03% v/v TMS

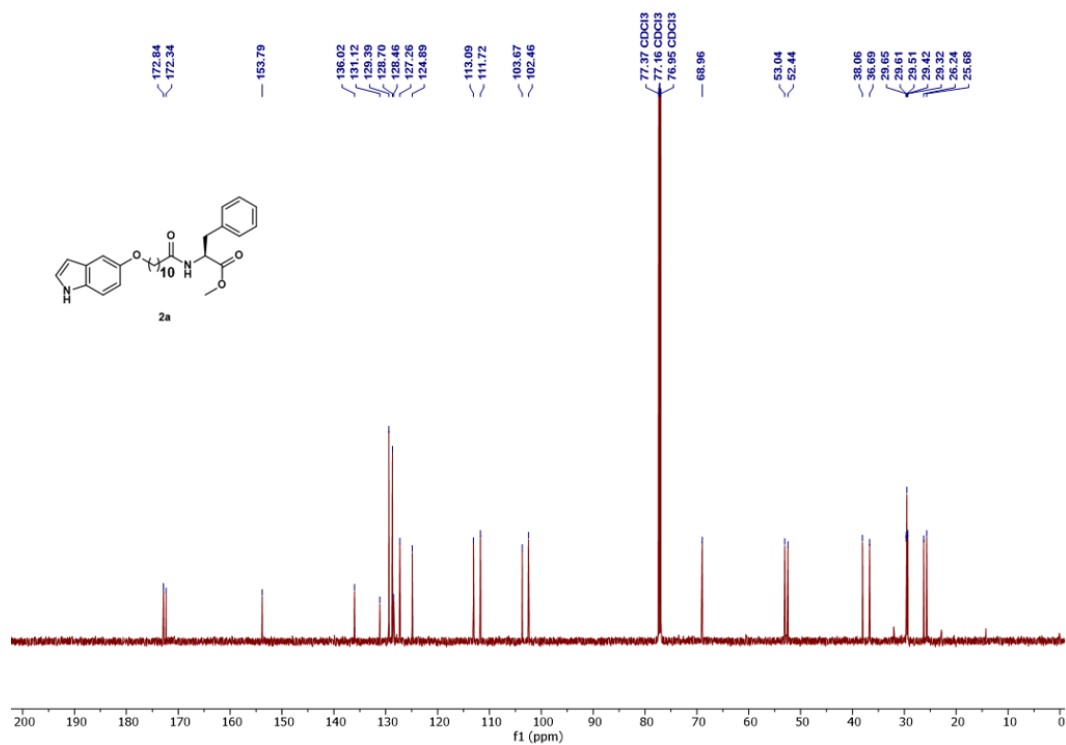

**Supplementary Fig. 57** | <sup>13</sup>C NMR spectrum (151 MHz, 25 °C) of compound 2a in CDCl<sub>3</sub> with 0.03% v/v TMS.

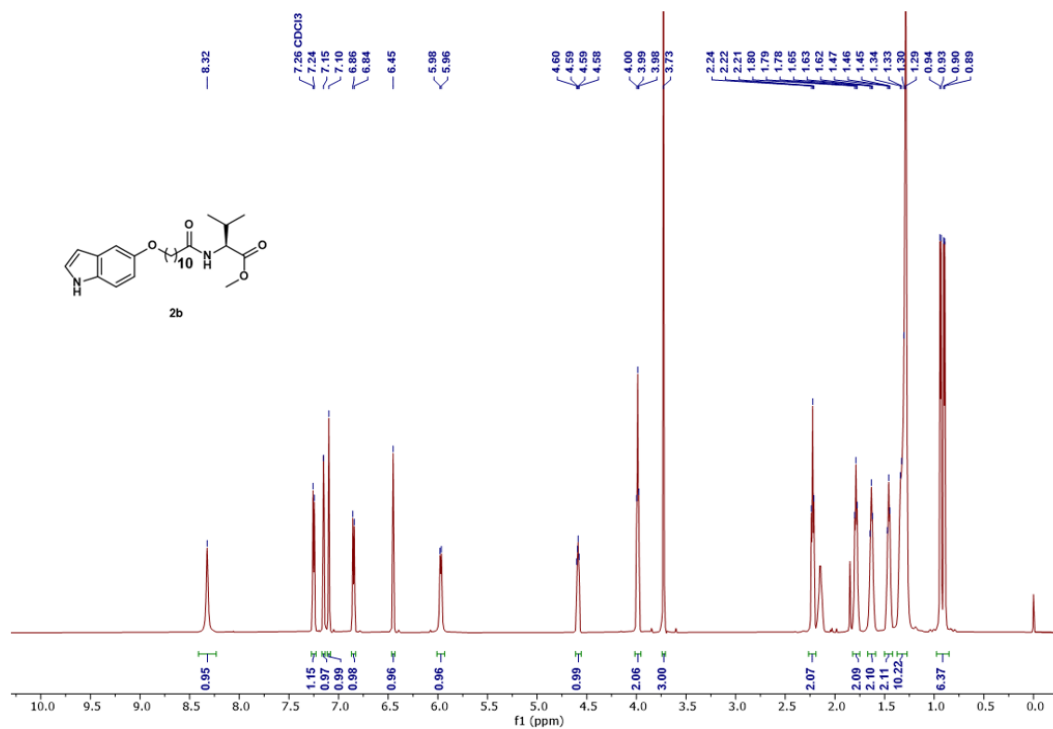

**Supplementary Fig. 58** | <sup>1</sup>H NMR spectrum (600 MHz, 25 °C) of compound **2b** in CDCl<sub>3</sub> with 0.03% v/v TMS

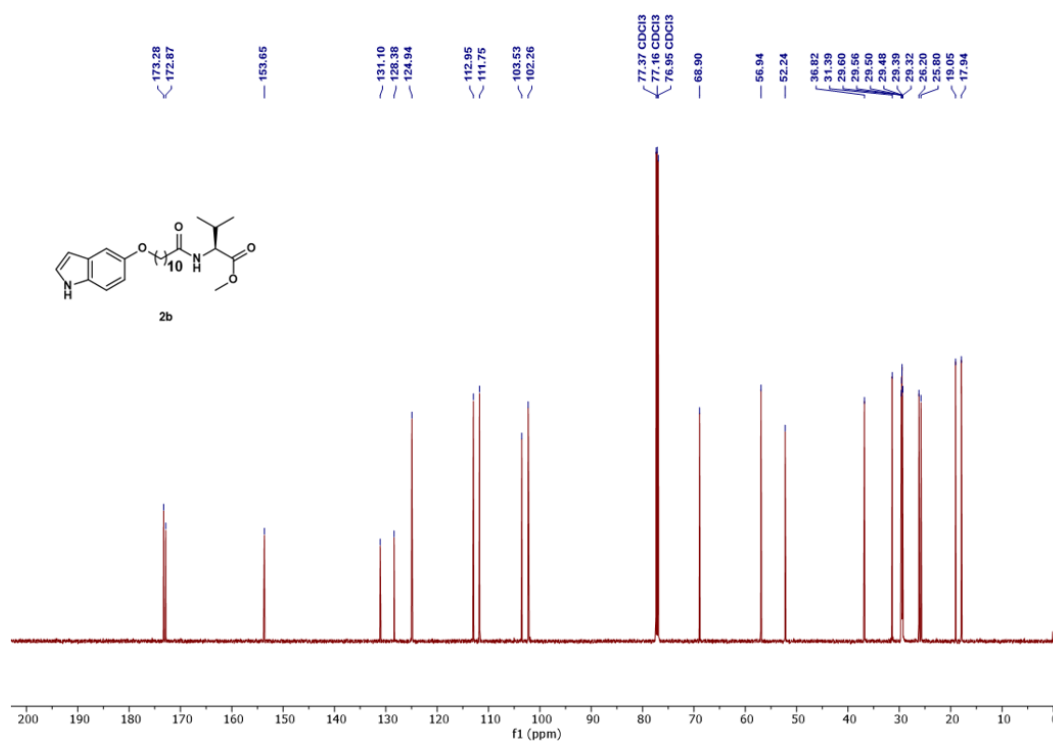

**Supplementary Fig. 59** | <sup>13</sup>C NMR spectrum (151 MHz, 25 °C) of compound **2b** in CDCl<sub>3</sub> with 0.03% v/v TMS.

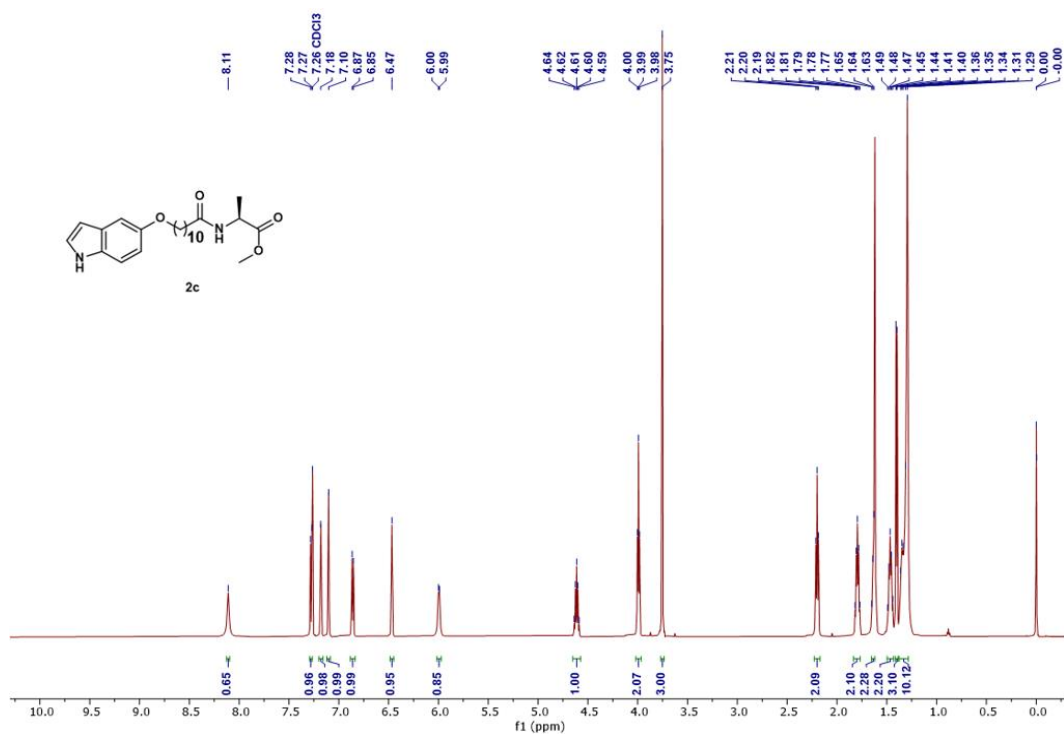

**Supplementary Fig. 60** | <sup>1</sup>H NMR spectrum (600 MHz, 25 °C) of compound **2c** in CDCl<sub>3</sub> with 0.03% v/v TMS

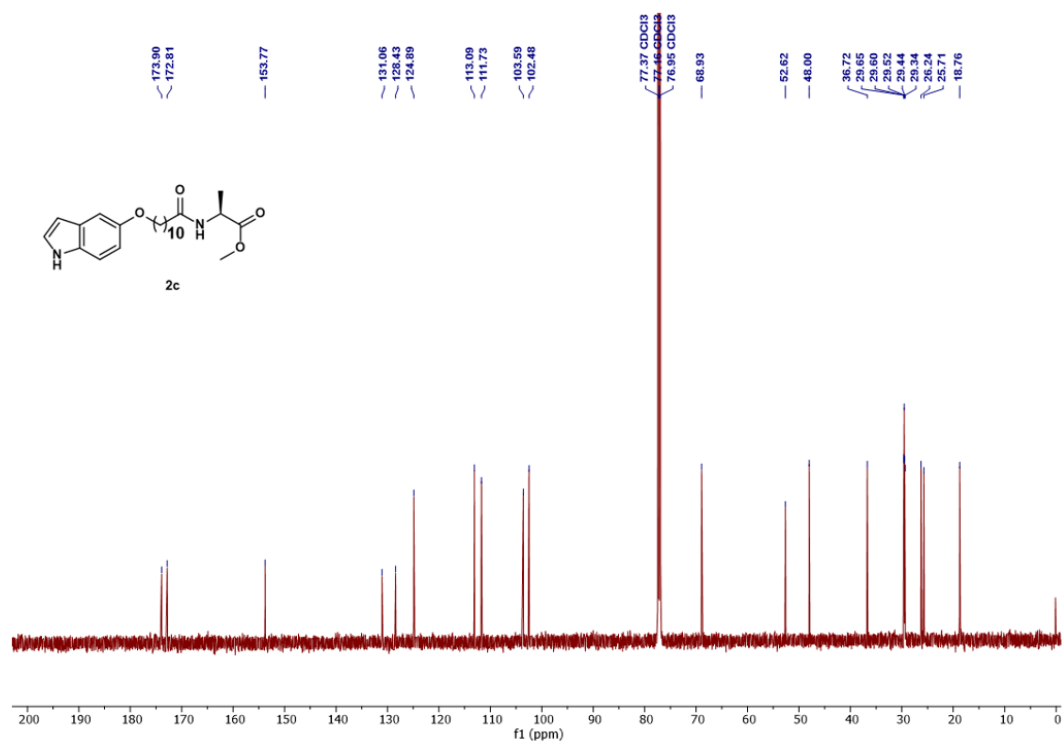

**Supplementary Fig. 61** | <sup>13</sup>C NMR spectrum (151 MHz, 25 °C) of compound **2c** in CDCl<sub>3</sub> with 0.03% v/v TMS.

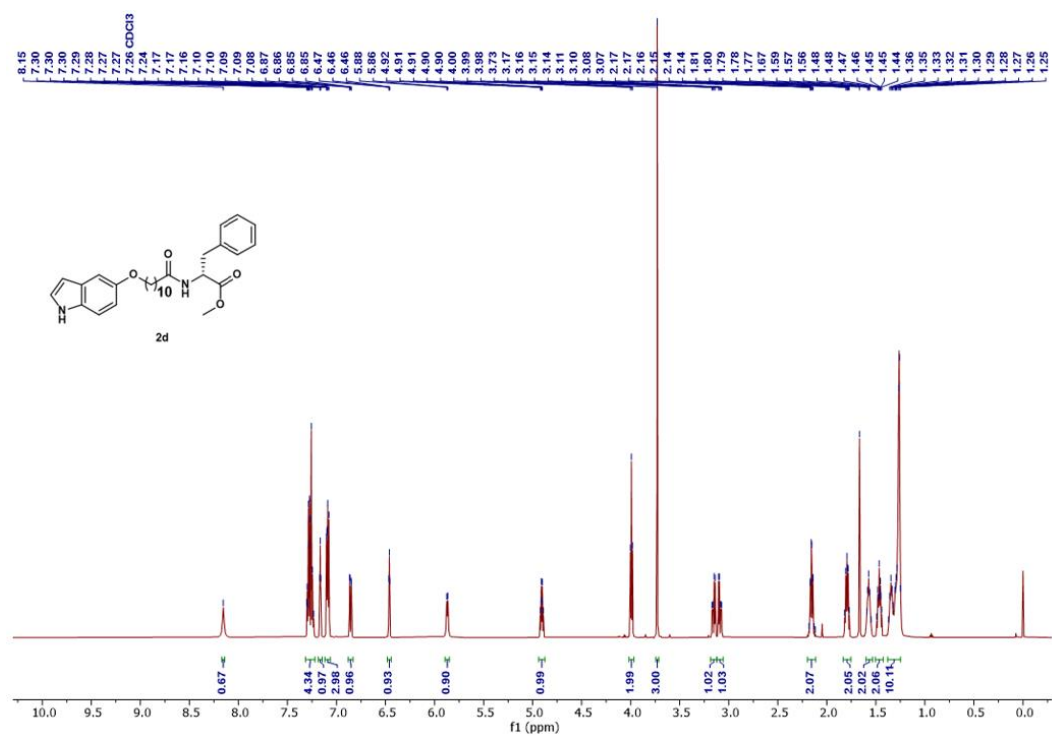

**Supplementary Fig. 62** |  $^1\text{H}$  NMR spectrum (600 MHz, 25 °C) of compound **2d** in  $\text{CDCl}_3$  with 0.03% v/v TMS

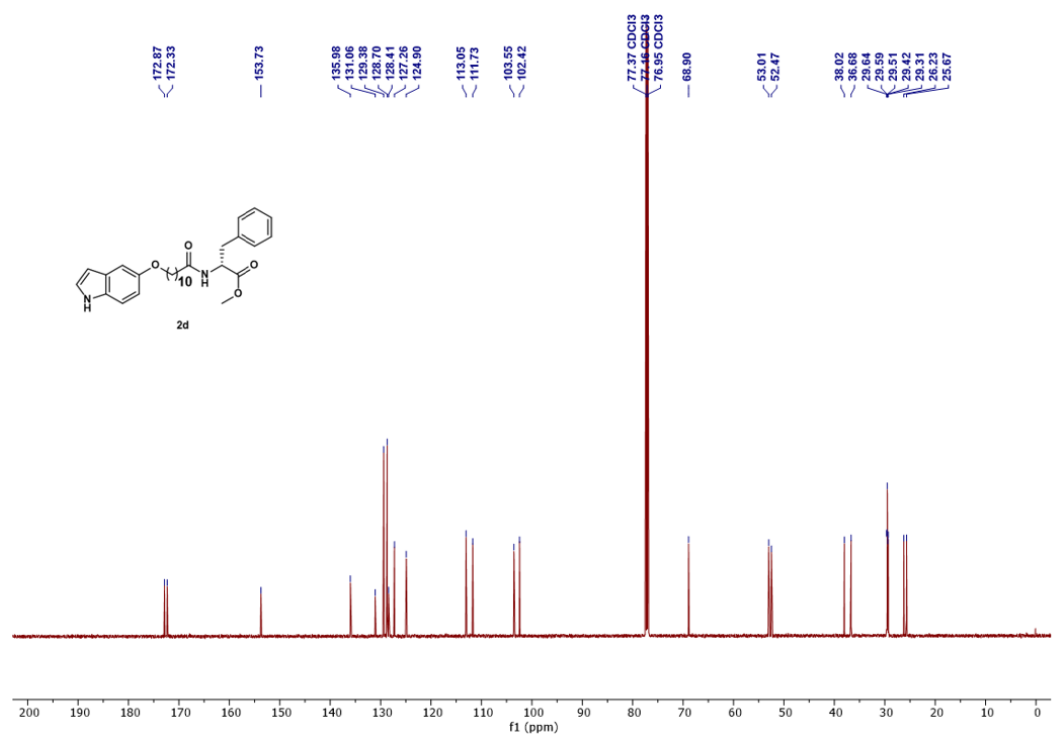

**Supplementary Fig. 63** |  $^{13}\text{C}$  NMR spectrum (151 MHz, 25 °C) of compound **2d** in  $\text{CDCl}_3$  with 0.03% v/v TMS.

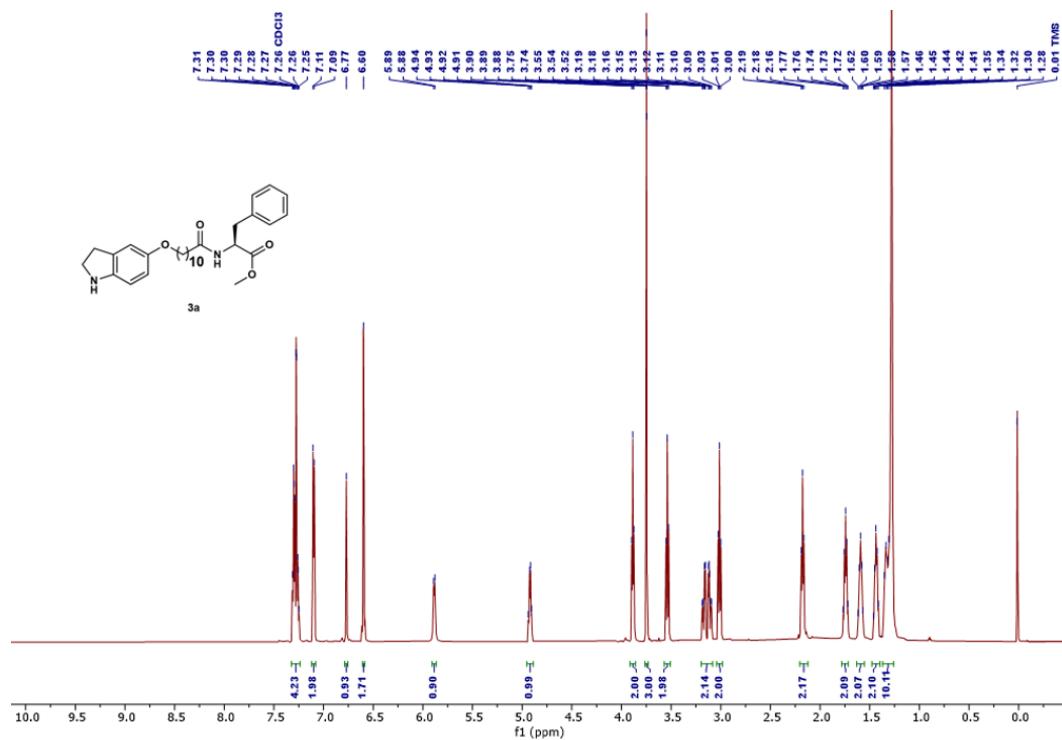

**Supplementary Fig. 64** |  $^1\text{H}$  NMR spectrum (600 MHz, 25 °C) of compound **3a** in  $\text{CDCl}_3$  with 0.03% v/v TMS

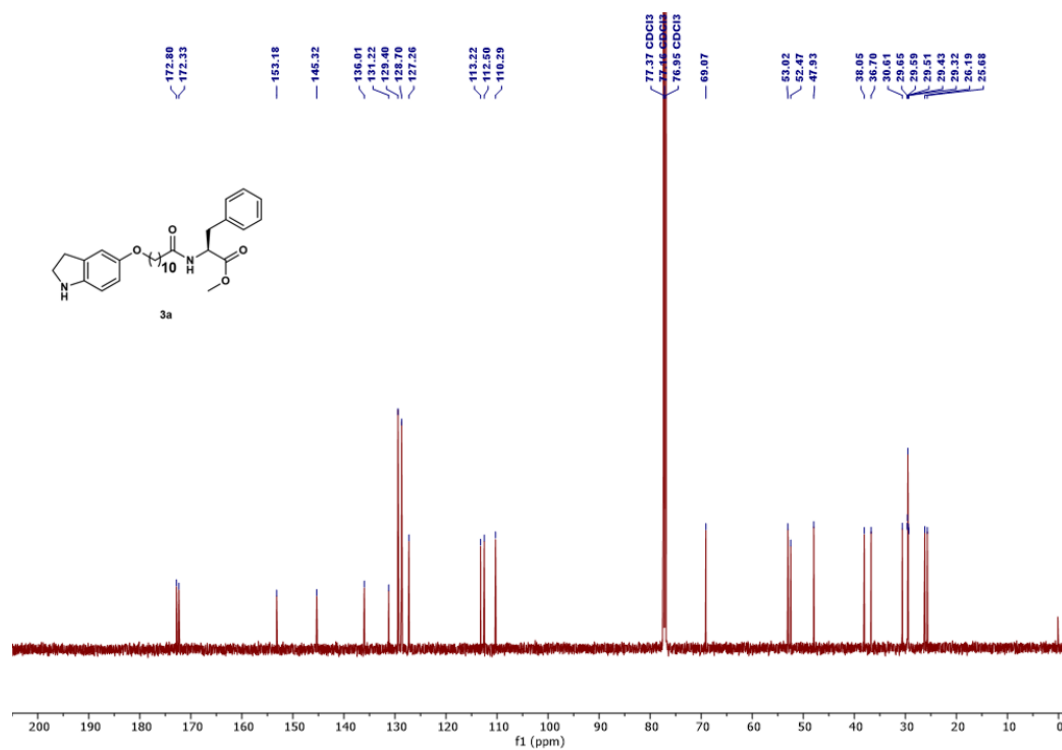

**Supplementary Fig. 65** |  $^{13}\text{C}$  NMR spectrum (151 MHz, 25 °C) of compound **3a** in  $\text{CDCl}_3$  with 0.03% v/v TMS.

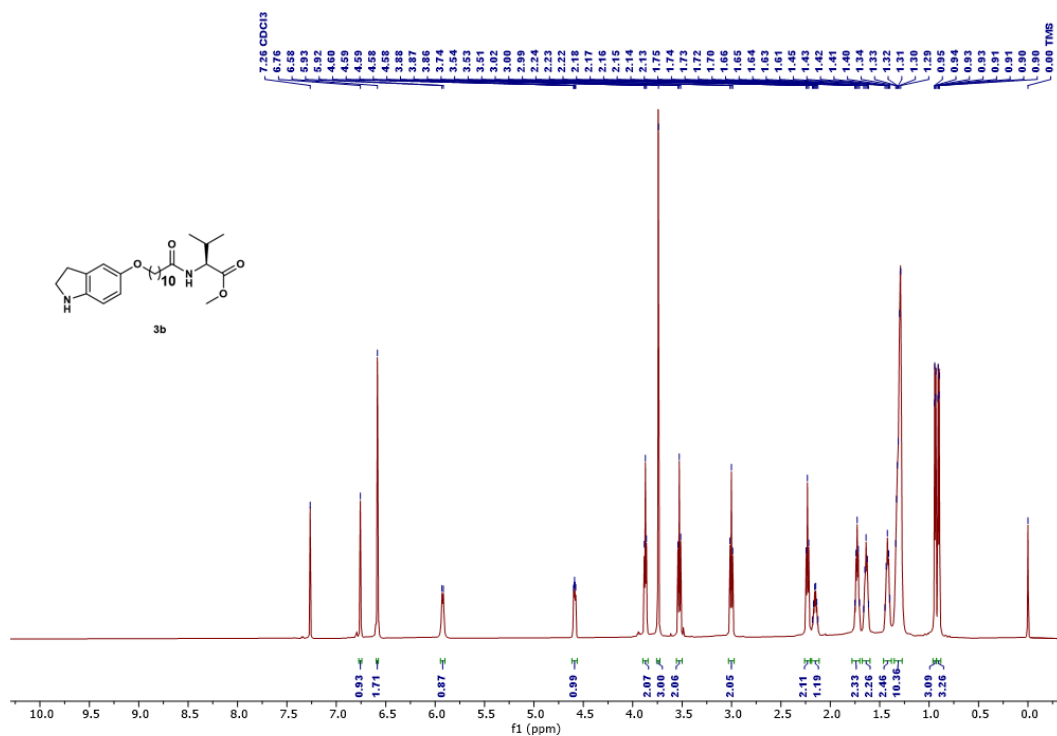

**Supplementary Fig. 66** | <sup>1</sup>H NMR spectrum (600 MHz, 25 °C) of compound **3b** in CDCl<sub>3</sub> with 0.03% v/v TMS

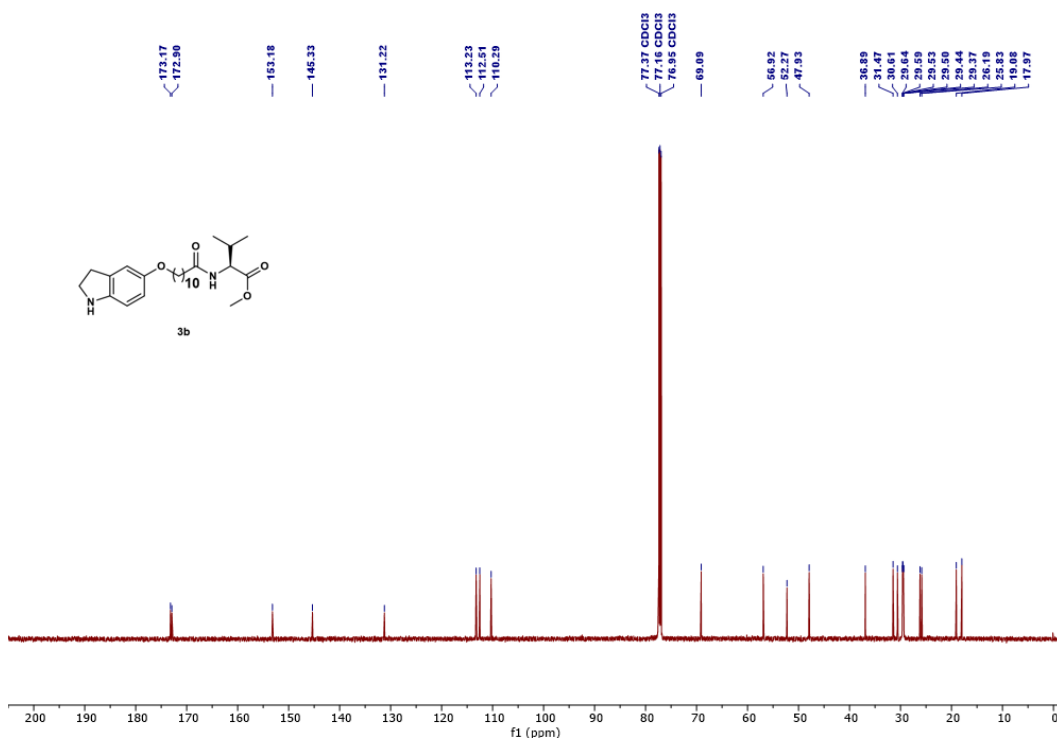

**Supplementary Fig. 67** | <sup>13</sup>C NMR spectrum (151 MHz, 25 °C) of compound **3b** in CDCl<sub>3</sub> with 0.03% v/v TMS.

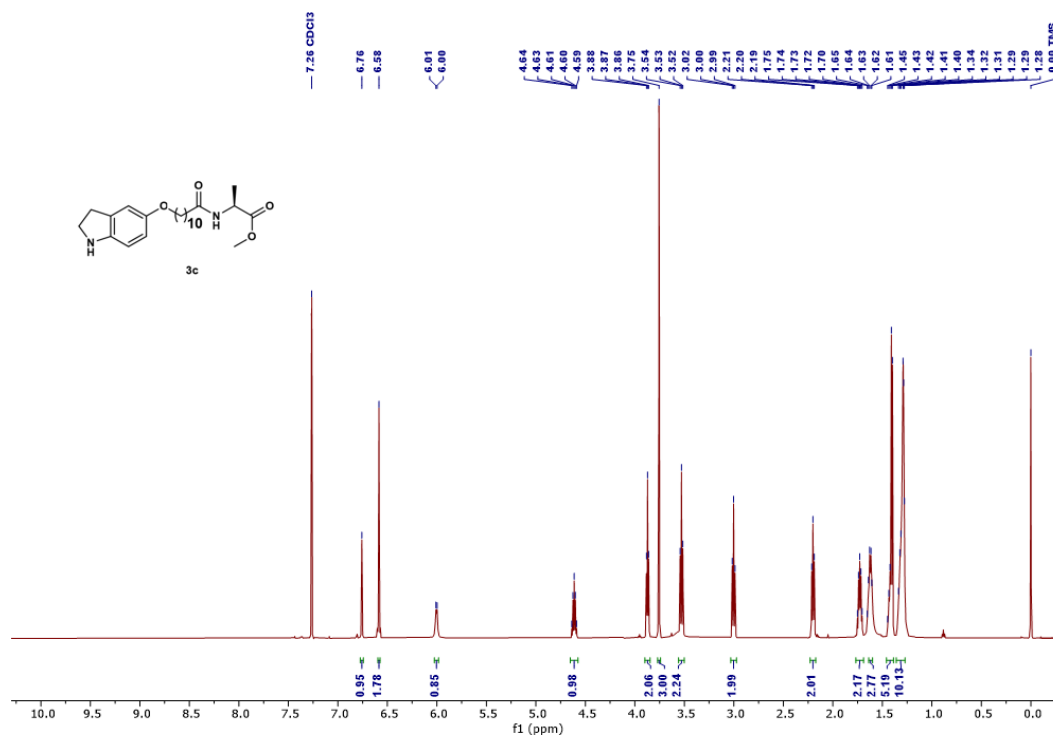

**Supplementary Fig. 68** | <sup>1</sup>H NMR spectrum (600 MHz, 25 °C) of compound **3c** in CDCl<sub>3</sub> with 0.03% v/v TMS

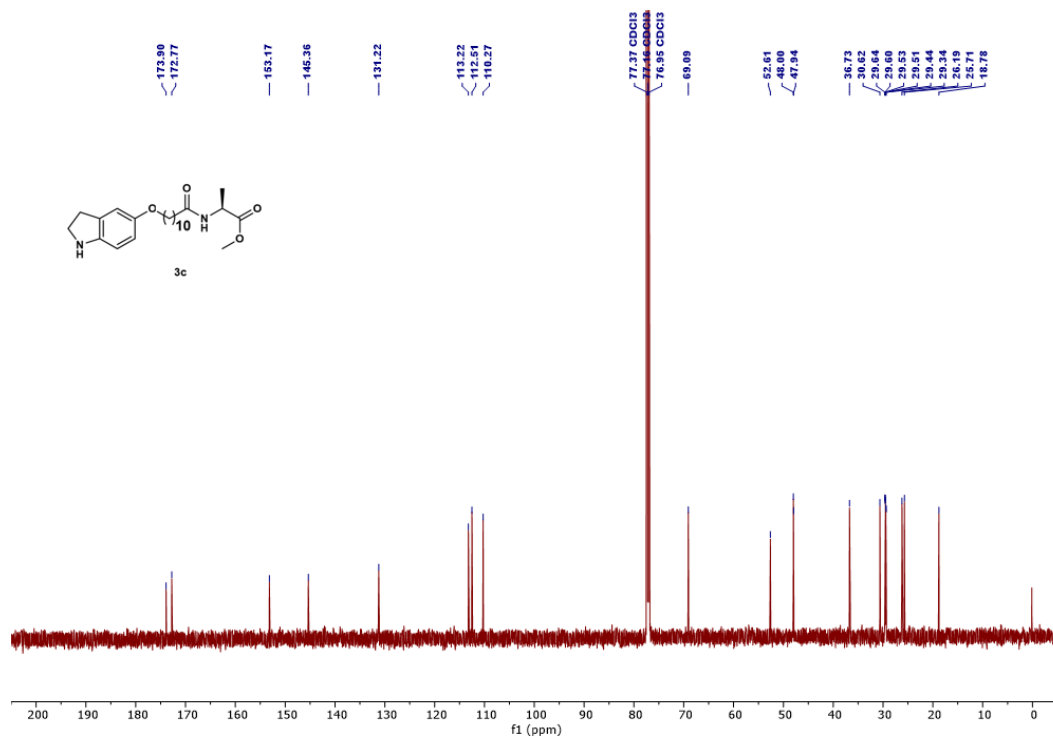

**Supplementary Fig. 69** | <sup>13</sup>C NMR spectrum (151 MHz, 25 °C) of compound **3c** in CDCl<sub>3</sub> with 0.03% v/v TMS.

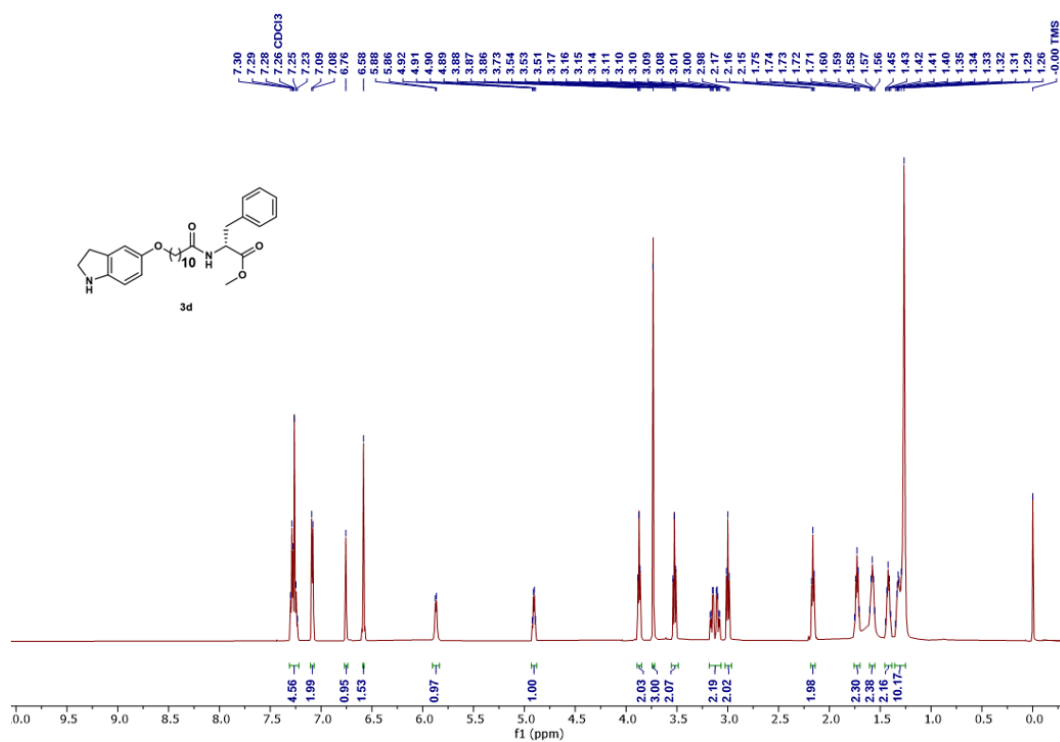

**Supplementary Fig. 70** | <sup>1</sup>H NMR spectrum (600 MHz, 25 °C) of compound **3d** in CDCl<sub>3</sub> with 0.03% v/v TMS

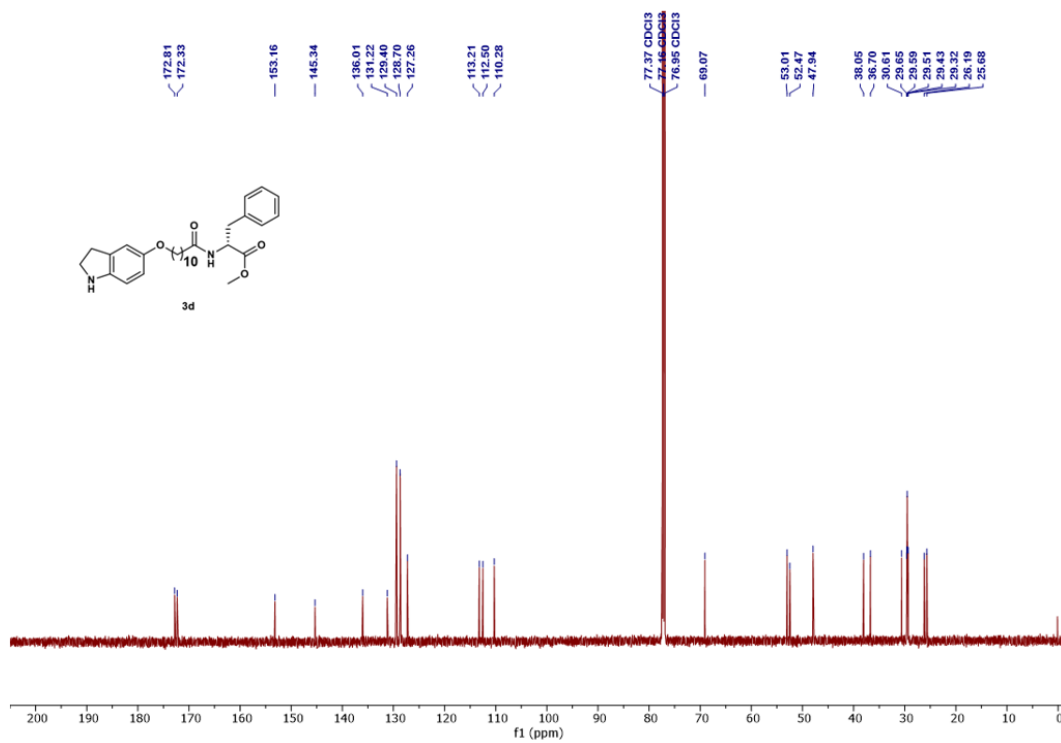

**Supplementary Fig. 71** | <sup>13</sup>C NMR spectrum (151 MHz, 25 °C) of compound **3d** in CDCl<sub>3</sub> with 0.03% v/v TMS.



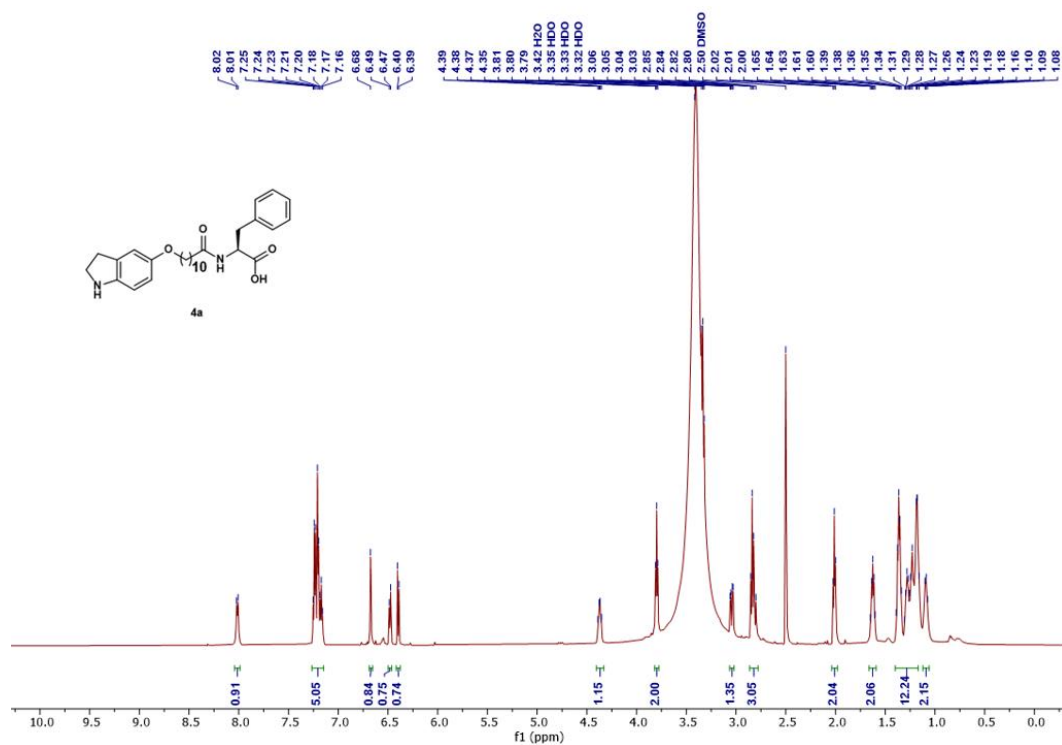

Supplementary Fig. 72 | <sup>1</sup>H NMR spectrum (600 MHz, 25 °C) of compound **4a** in DMSO-*d*<sub>6</sub>

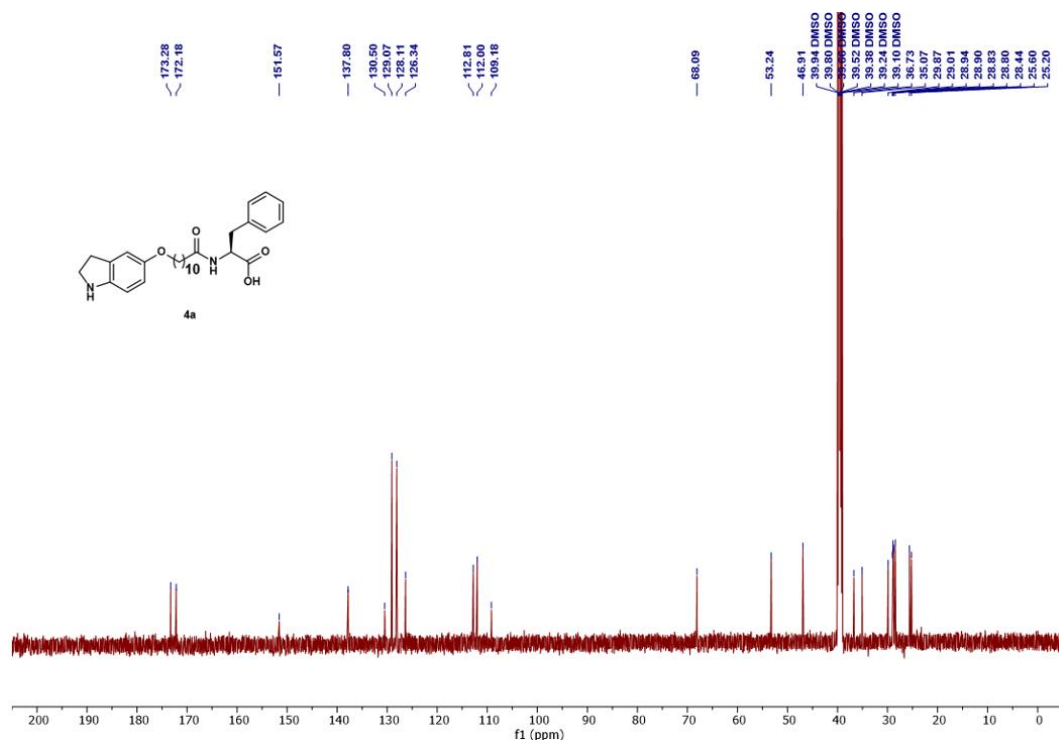

Supplementary Fig. 73 | <sup>13</sup>C NMR spectrum (151 MHz, 25 °C) of compound **4a** in DMSO-*d*<sub>6</sub>

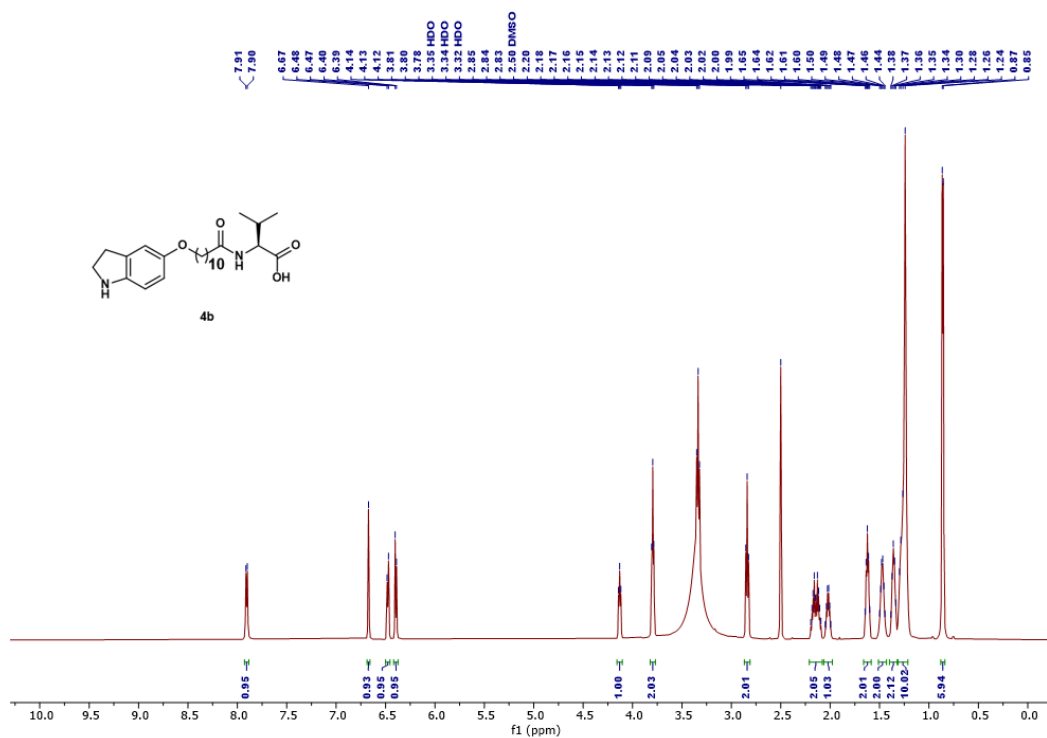

**Supplementary Fig. 74** | <sup>1</sup>H NMR spectrum (600 MHz, 25 °C) of compound **4b** in DMSO-*d*<sub>6</sub>

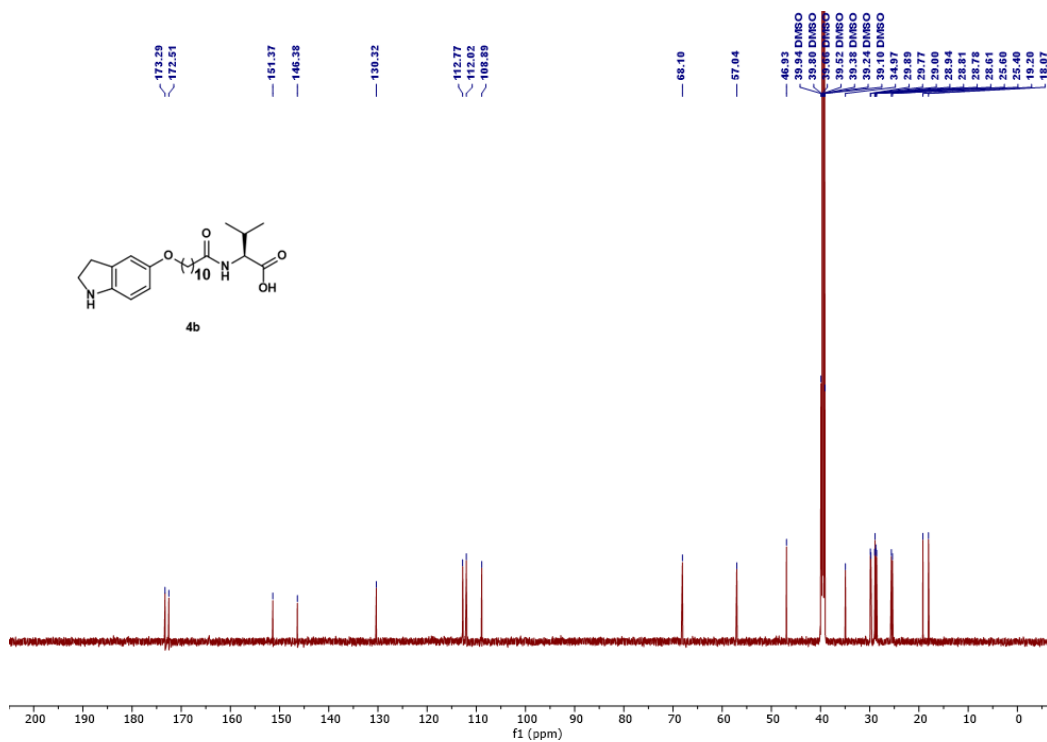

**Supplementary Fig. 75** | <sup>13</sup>C NMR spectrum (151 MHz, 25 °C) of compound **4b** in DMSO-*d*<sub>6</sub>

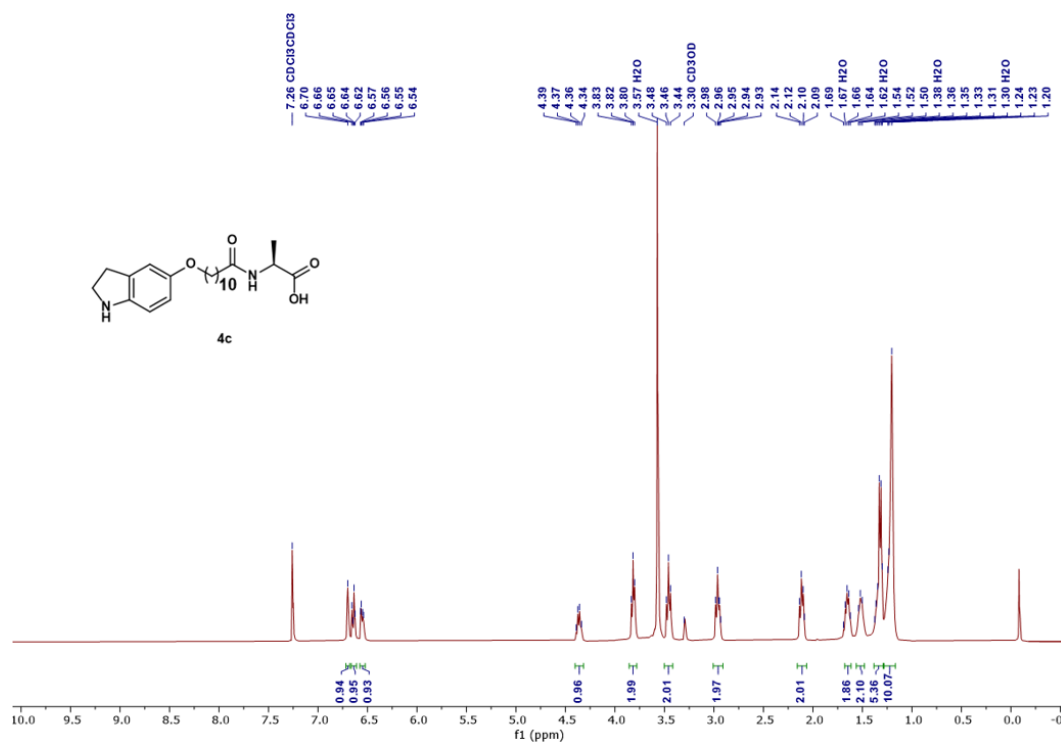

**Supplementary Fig. 76** |  $^1\text{H}$  NMR spectrum (400 MHz, 25 °C) of compound **4c** in 9 : 1  $\text{CDCl}_3$  with 0.03% v/v TMS:  $\text{CD}_3\text{OD}$

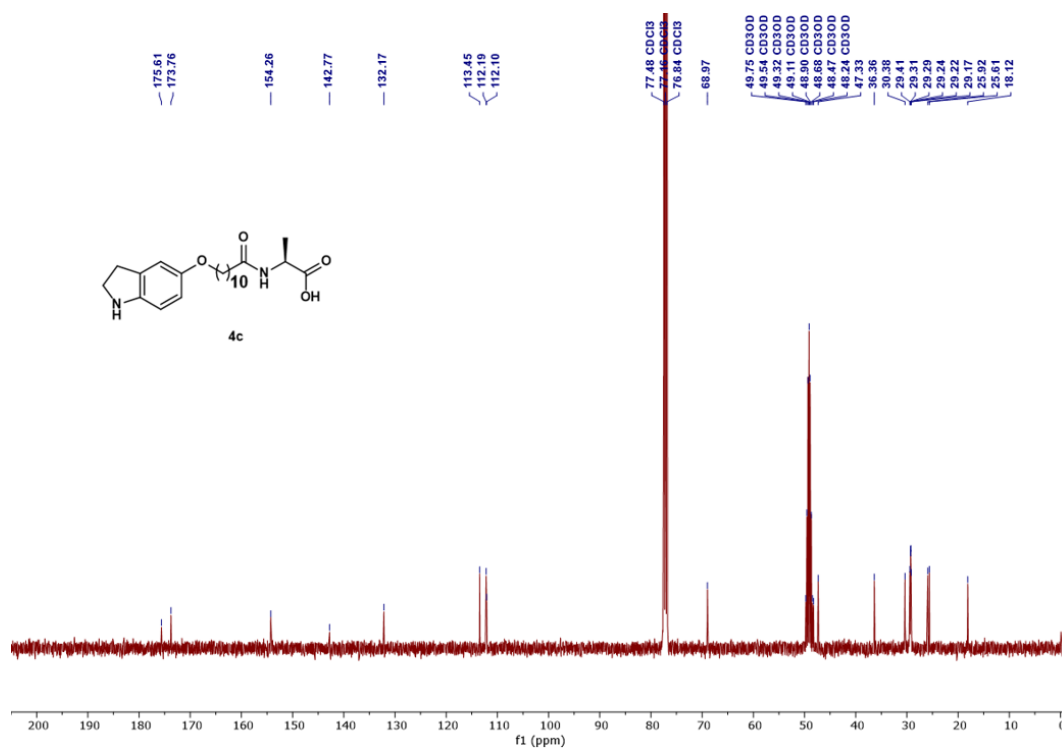

**Supplementary Fig. 77** |  $^{13}\text{C}$  NMR spectrum (101 MHz, 25 °C) of compound **4c** in 9 : 1  $\text{CDCl}_3$  with 0.03% v/v TMS:  $\text{CD}_3\text{OD}$ .

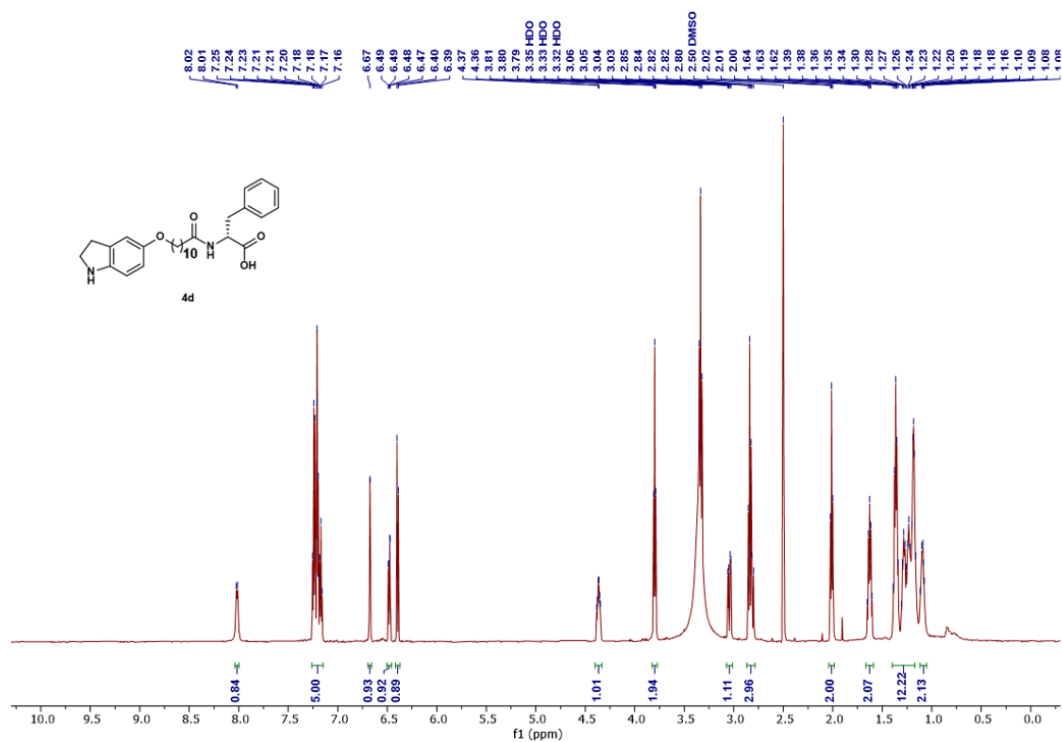

Supplementary Fig. 78 |  $^1\text{H}$  NMR spectrum (600 MHz, 25 °C) of compound **4d** in  $\text{DMSO}-d_6$

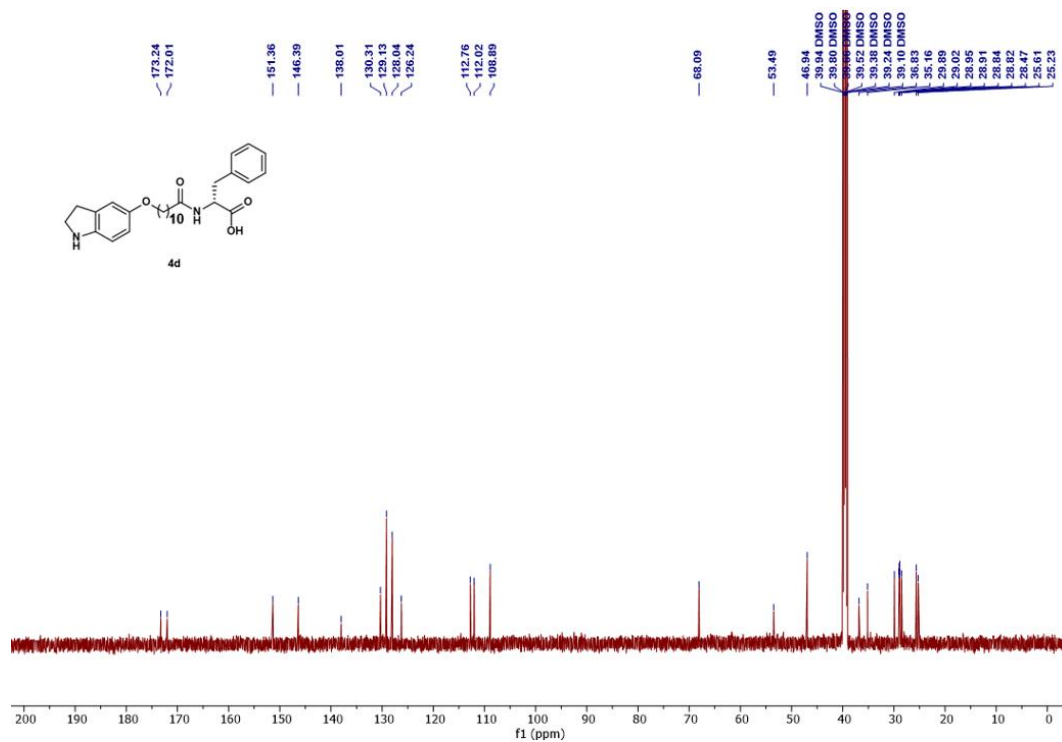

Supplementary Fig. 79 |  $^{13}\text{C}$  NMR spectrum (151 MHz, 25 °C) of compound **4d** in  $\text{DMSO}-d_6$

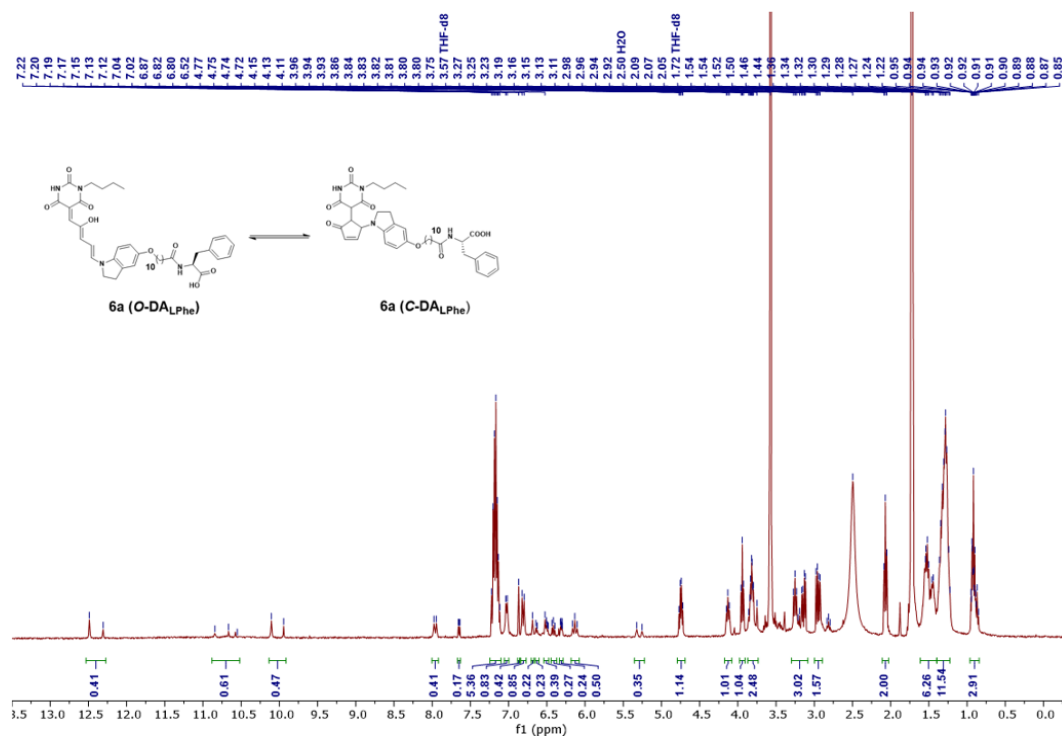

**Supplementary Fig. 80** | <sup>1</sup>H NMR spectrum (400 MHz, 25 °C) of **compound 6a (DALPhe)** in THF-*d*<sub>8</sub>.

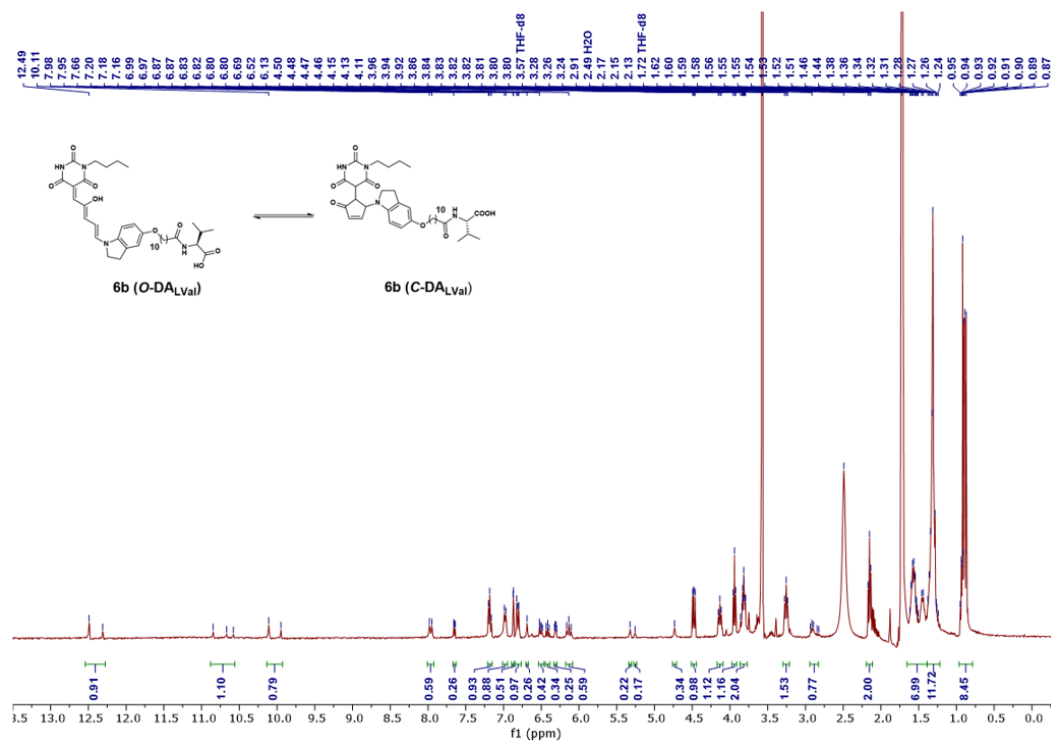

**Supplementary Fig. 81** | <sup>1</sup>H NMR spectrum (400 MHz, 25 °C) of **compound 6b (DALVal)** in THF-*d*<sub>8</sub>.

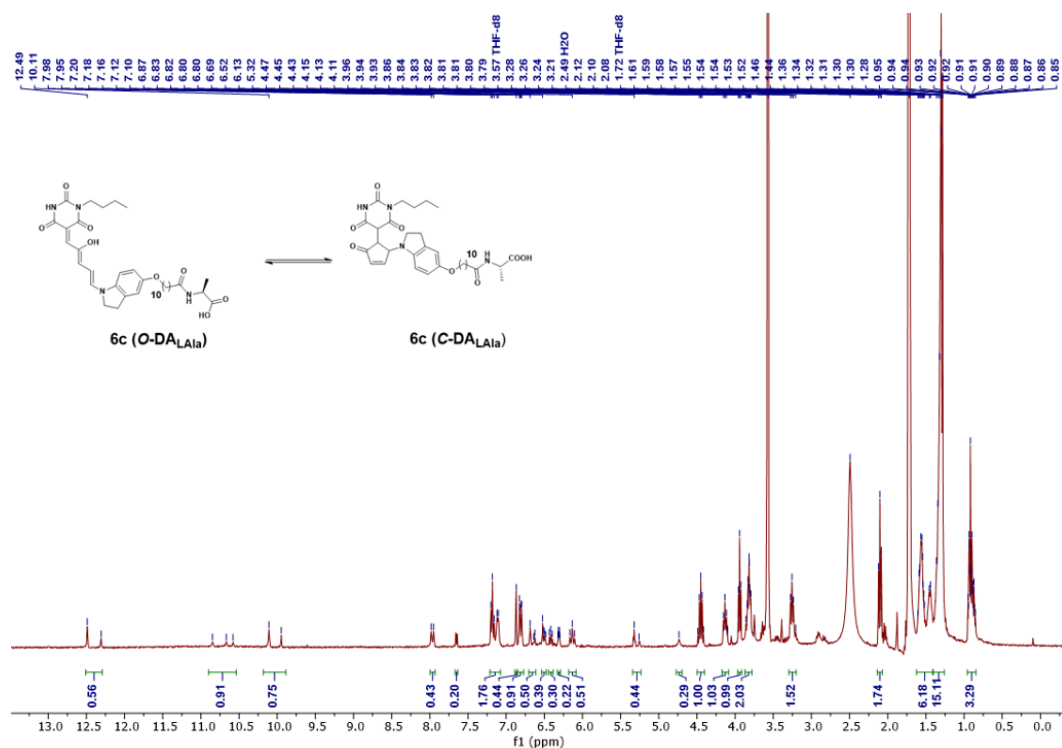

**Supplementary Fig. 82** | <sup>1</sup>H NMR spectrum (400 MHz, 25 °C) of compound **6c** (DA<sub>LAla</sub>) in THF-*d*<sub>8</sub>.

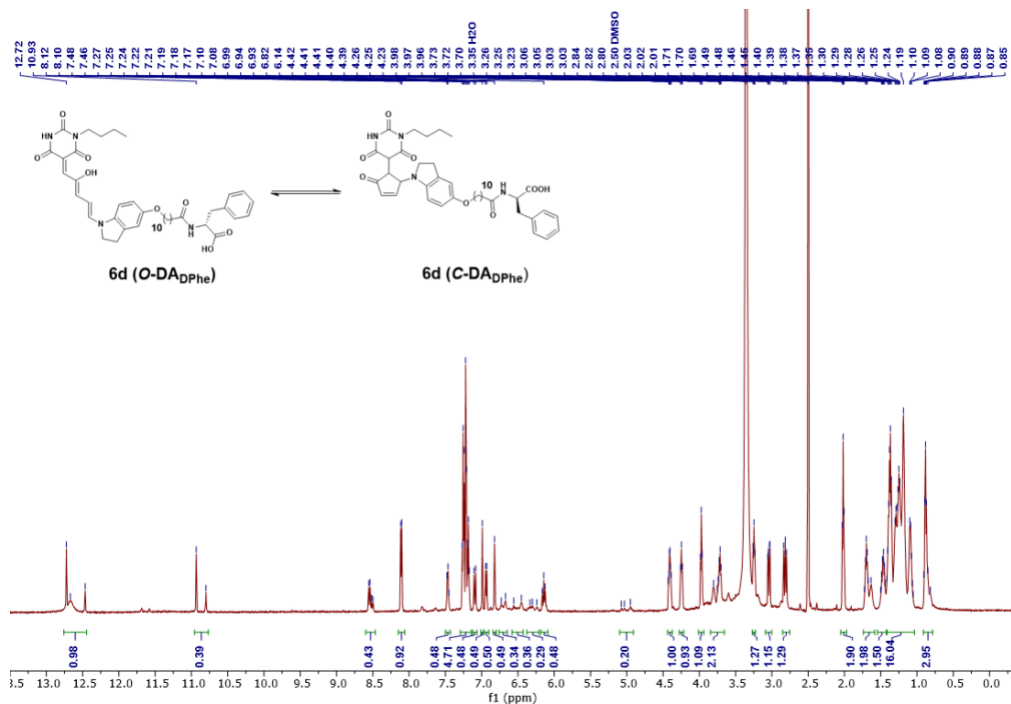

## 5. References

1. Fulmer, G. R. *et al.* NMR Chemical Shifts of Trace Impurities: Common Laboratory Solvents, Organics, and Gases in Deuterated Solvents Relevant to the Organometallic Chemist. *Organometallics* **29**, 2176–2179 (2010).
2. Hung, K. L. *et al.* A Soft Robot Based on Charged Spiropyran Amphiphilic Supramolecular Nanoassembly for Macroscopic Actuation. *ACS Appl. Nano Mater.* **8**, 8876–8885 (2025).
